# Supplementary material for: A phosphoryl radical-initiated Atherton–Todd-type reaction under open air
Source: Royal Society of Chemistry journal article supplement (doi:10.1039/c9cc09407e), 2019-12-20

## Phosphoryl radical-initiated Atherton–Todd-type reaction under open air

Yingcong Ou,<sup>a</sup> Yuanting Huang,<sup>a</sup> Zhenlin He,<sup>a</sup> Guodian Yu,<sup>a</sup> Yanping Huo,<sup>a</sup> Xianwei  
Li,<sup>a</sup> Yang Gao,<sup>a</sup> and Qian Chen<sup>\*a,b</sup>

<sup>a</sup>School of Chemical Engineering and Light Industry, Guangdong University of  
Technology, Guangzhou 510006, China

<sup>b</sup>Key Laboratory of Functional Molecular Engineering of Guangdong Province, South  
China University of Technology, Guangzhou 510640, China

\*qianchen@gdut.edu.cn

## SUPPORTING INFORMATION

### Content:

|                                          |     |
|------------------------------------------|-----|
| 1. General Information.....              | S2  |
| 2. Overview of Substrates Numbering..... | S3  |
| 3. Mechanistic Studies.....              | S4  |
| 4. Experimental Section.....             | S9  |
| 5. Analytic Data for Products.....       | S11 |
| 6. NMR Spectra for Products.....         | S29 |

## 1. General Information

Unless otherwise stated, commercially available reagents including dry solvents were used without additional purification. Petroleum ether refers to the petroleum fraction b.p. 60–90 °C. Secondary phosphine oxides which were not commercially available were prepared according to the literature.<sup>1</sup> All reactions were carried out in oven-dried thick-walled glassware. Flash chromatography was performed using the indicated solvent system on silica gel standard grade (200–300 mesh). <sup>1</sup>H NMR spectra were recorded in CDCl<sub>3</sub> on a Bruker 400 (400 MHz) spectrometer. <sup>13</sup>C NMR spectra were recorded in CDCl<sub>3</sub> on a Bruker 400 (100 MHz) spectrometer. <sup>31</sup>P NMR spectra were recorded in CDCl<sub>3</sub> on a Bruker 400 (162 MHz) spectrometer. <sup>19</sup>F NMR spectra were recorded in CDCl<sub>3</sub> on a Bruker 400 (376 MHz) spectrometer. Chemical shifts were reported relative to CDCl<sub>3</sub> ( $\delta$  7.26 ppm) for <sup>1</sup>H NMR and CDCl<sub>3</sub> ( $\delta$  77.16 ppm) for <sup>13</sup>C NMR. High-resolution mass spectra (HRMS) were recorded on an Q-Exactive Orbitrap mass spectrometer (Thermo, CA). Abbreviations for signal coupling are as follows: s = singlet, d = doublet; t = triplet, q = quartet, dd = doublet of doublets, m = multiplet, br = broad.

## 2. Overview of Substrates Numbering

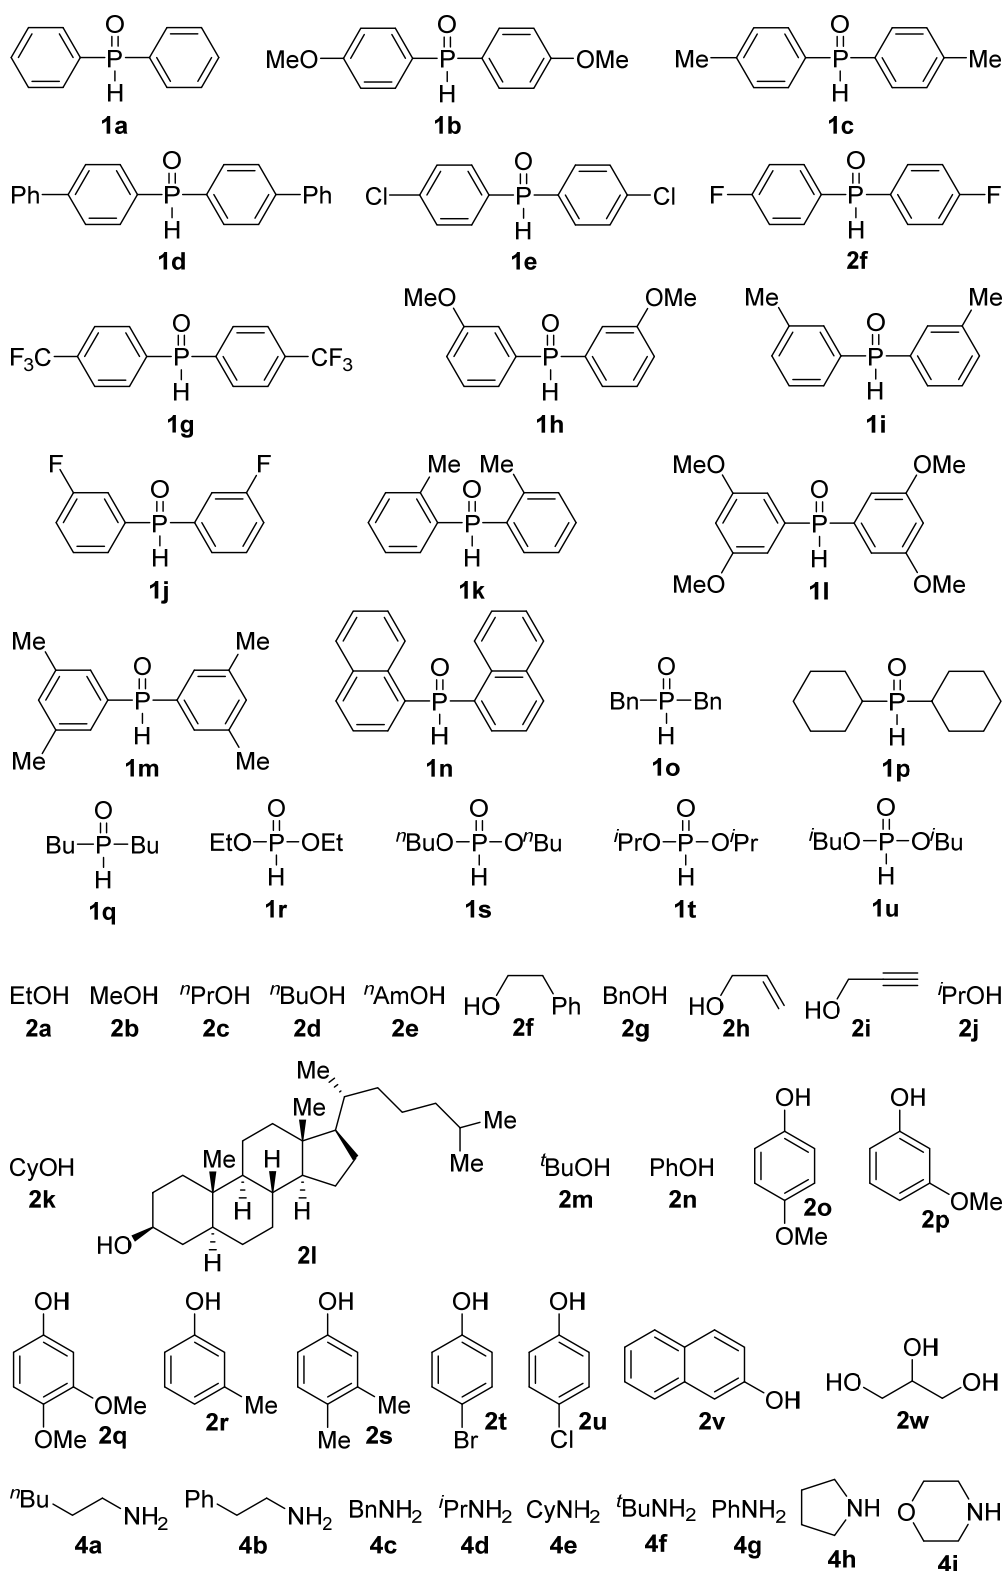

### 3. Mechanistic Studies

#### 1) The Investigation of the Effect of Air Atmosphere

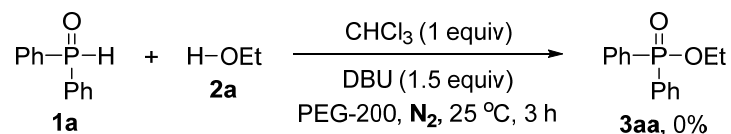

To a solution of diphenylphosphine oxide **1a** (40 mg, 0.2 mmol) and ethanol **2a** (46 mg, 1 mmol) in PEG-200 (2 mL) were added CHCl<sub>3</sub> (24 mg, 0.2 mmol) and DBU (46 mg, 0.3 mmol). The mixture was stirred at 25 °C under N<sub>2</sub> for 3 h. The reaction mixture was quenched with saturated aqueous NaCl solution (20 mL), and the resulting mixture was then extracted with ethyl acetate (3×20 mL). The combined organic layers were dried over anhydrous Na<sub>2</sub>SO<sub>4</sub> and concentrated under reduced pressure. The desired ethyl diphenylphosphinate **3aa** was not detected from <sup>1</sup>H NMR spectrum of the crude mixture.

#### 2) The Investigation of the Effect of Visible Light

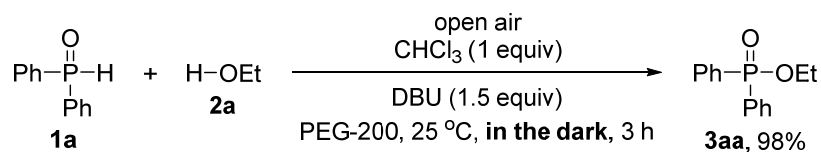

To a solution of diphenylphosphine oxide **1a** (40 mg, 0.2 mmol) and ethanol **2a** (46 mg, 1 mmol) in PEG-200 (2 mL) were added CHCl<sub>3</sub> (24 mg, 0.2 mmol) and DBU (46 mg, 0.3 mmol). The mixture was stirred at 25 °C under air atmosphere in the dark for 3 h. The reaction mixture was quenched with saturated aqueous NaCl solution (20 mL), and the resulting mixture was then extracted with ethyl acetate (3×20 mL). The combined organic layers were dried over anhydrous Na<sub>2</sub>SO<sub>4</sub> and concentrated under reduced pressure. The crude product was purified by flash column chromatography on silica gel with petroleum ether/ethyl acetate (2:1) to afford ethyl diphenylphosphinate **3aa** (48 mg, 98%) as a colorless oil.

### 3) The Investigation of By-Products

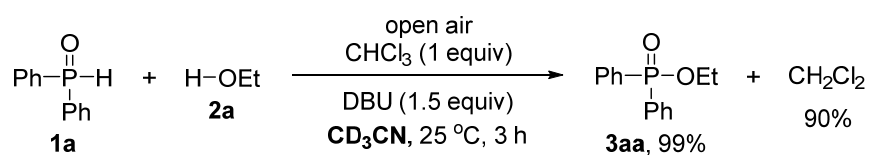

To a solution of diphenylphosphine oxide **1a** (10 mg, 0.05 mmol) and ethanol **2a** (12 mg, 0.25 mmol) in CD<sub>3</sub>CN (0.5 mL) were added CHCl<sub>3</sub> (6 mg, 0.05 mmol) and DBU (12 mg, 0.075 mmol). The mixture was stirred at 25 °C under air atmosphere for 3 h. The by-product CH<sub>2</sub>Cl<sub>2</sub> with 90% yield was detected from <sup>1</sup>H NMR spectrum of the resulting mixture according to the yield of **3aa** (99%).

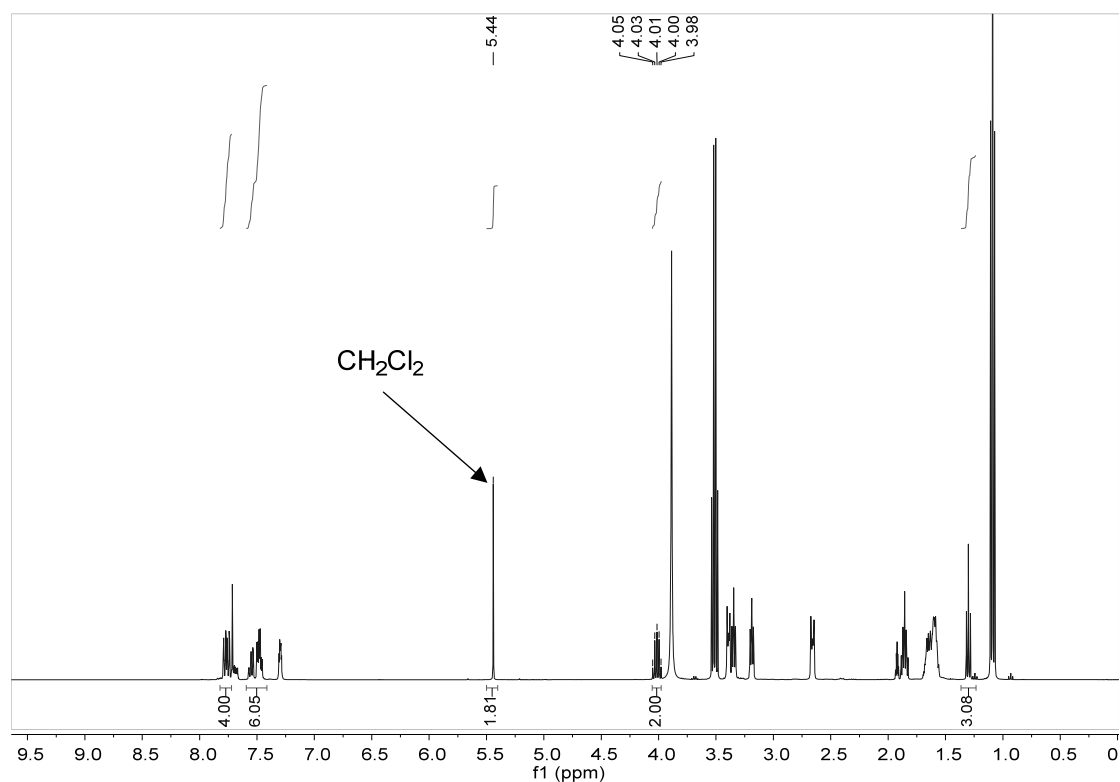

#### 4) Radical-Trapping Experiment

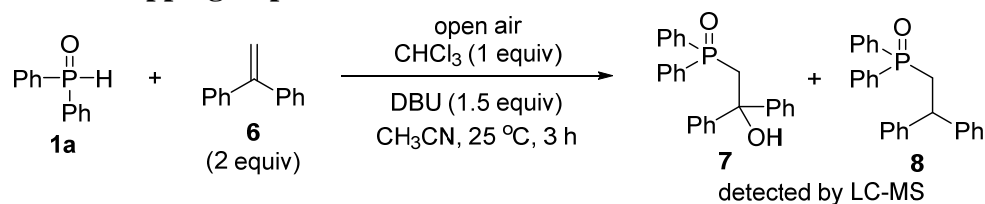

To a solution of diphenylphosphine oxide **1a** (40 mg, 0.2 mmol) and the radical scavenger diphenylethene **6** (72 mg, 0.4 mmol) in  $\text{CH}_3\text{CN}$  (2 mL) were added  $\text{CHCl}_3$  (24 mg, 0.2 mmol) and DBU (46 mg, 0.3 mmol). The mixture was stirred at  $25\text{ }^\circ\text{C}$  under air atmosphere for 3 h. The reaction mixture was then concentrated under reduced pressure. The adducts **7** and **8**, which should be generated via a phosphoryl radical pathway, were detected by LC-MS spectrum of the crude mixture.

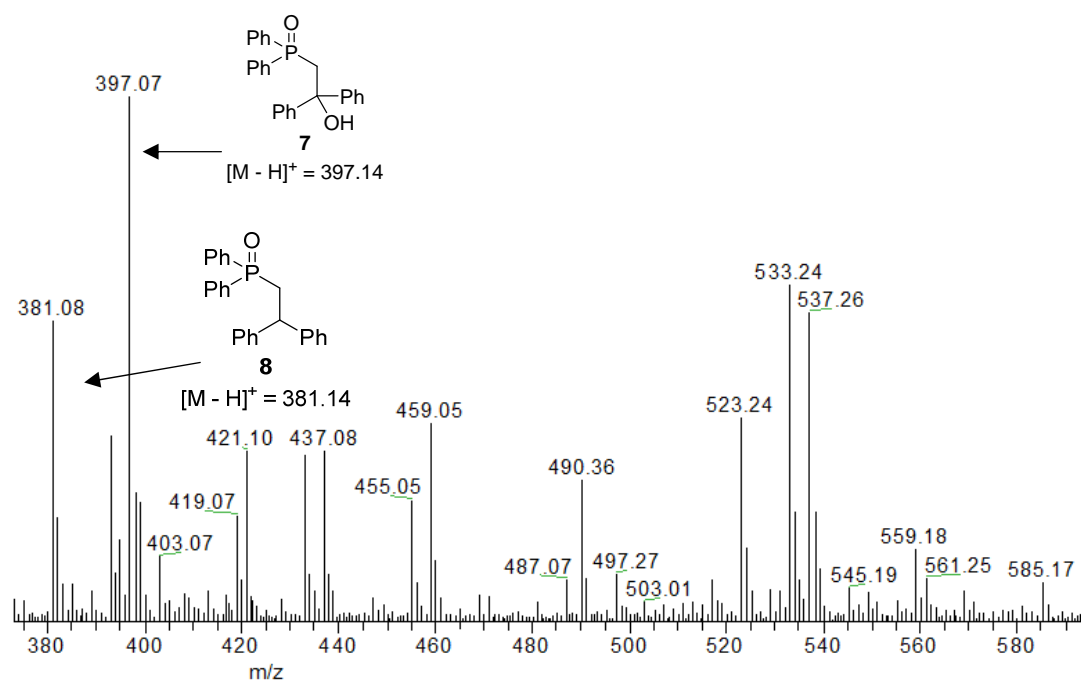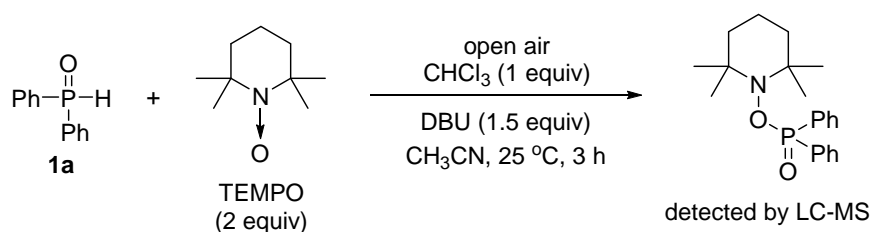

To a solution of diphenylphosphine oxide **1a** (40 mg, 0.2 mmol) and the radical scavenger TEMPO (62 mg, 0.4 mmol) in  $\text{CH}_3\text{CN}$  (2 mL) were added  $\text{CHCl}_3$  (24 mg, 0.2 mmol) and DBU (46 mg, 0.3 mmol). The mixture was stirred at  $25\text{ }^\circ\text{C}$  under air atmosphere for 3 h. The reaction mixture was then concentrated under reduced

pressure. The TEMPO-P(O)Ph<sub>2</sub> adduct was detected by LC-MS spectrum of the crude mixture, suggesting that a phosphoryl radical reaction pathway might be involved.

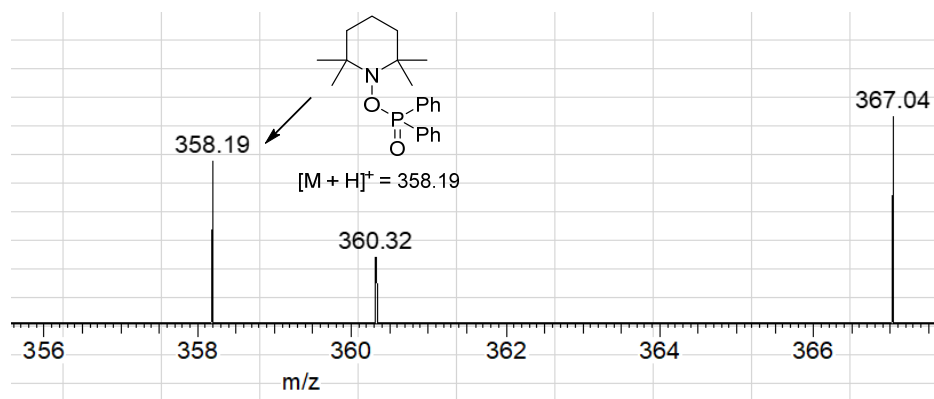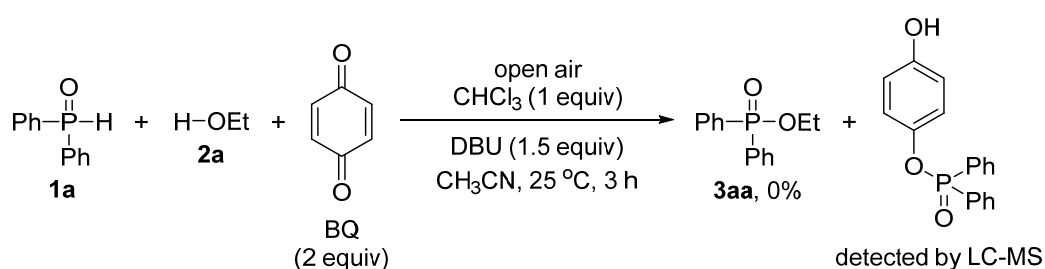

To a solution of diphenylphosphine oxide **1a** (40 mg, 0.2 mmol), ethanol **2a** (46 mg, 1 mmol) and the radical scavenger BQ (43 mg, 0.4 mmol) in CH<sub>3</sub>CN (2 mL) were added CHCl<sub>3</sub> (24 mg, 0.2 mmol) and DBU (46 mg, 0.3 mmol). The mixture was stirred at 25 °C under air atmosphere for 3 h. The reaction mixture was then concentrated under reduced pressure. The desired reaction of **1a** with **2a** was completely inhibited, and the BQ-P(O)Ph<sub>2</sub> adduct was detected by LC-MS spectrum of the crude mixture, suggesting that a radical reaction pathway might be involved.

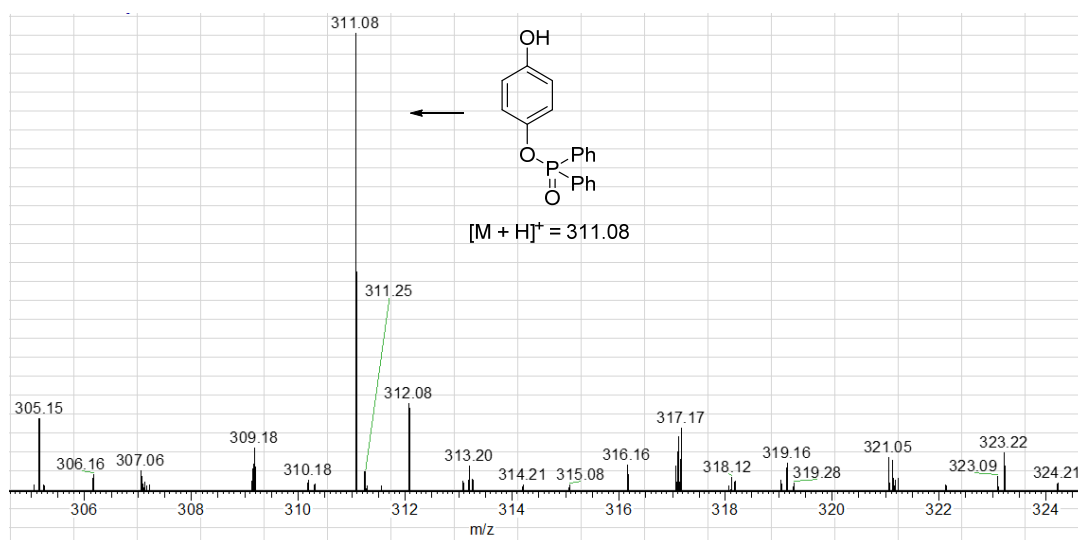

### 5) The Investigation of the Effect of Catalytic Amounts of O<sub>2</sub>

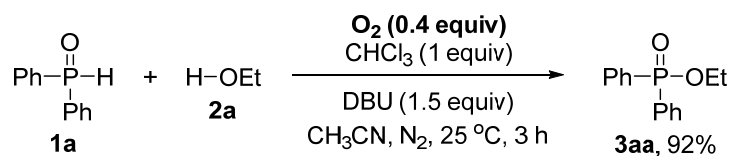

To a solution of diphenylphosphine oxide **1a** (40 mg, 0.2 mmol) and ethanol **2a** (46 mg, 1 mmol) in CH<sub>3</sub>CN (2 mL) were added CHCl<sub>3</sub> (24 mg, 0.2 mmol), DBU (46 mg, 0.3 mmol), and O<sub>2</sub> (1.8 mL, 0.08 mmol) under N<sub>2</sub>. The mixture was stirred at 25 °C for 3 h. The reaction mixture was then concentrated under reduced pressure. The crude product was purified by flash column chromatography on silica gel with petroleum ether/ethyl acetate (2:1) to afford ethyl diphenylphosphinate **3aa** (45 mg, 92%) as a colorless oil.



## 4. Experimental Section

### 1) General Procedure for the Atherton–Todd-Type Reaction in CH<sub>3</sub>CN

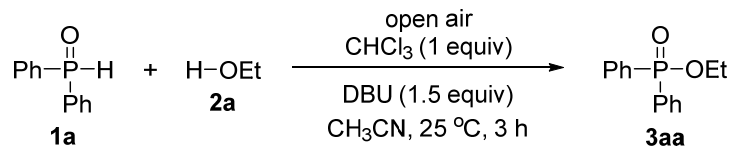

To a solution of diphenylphosphine oxide **1a** (40 mg, 0.2 mmol) and ethanol **2a** (46 mg, 1 mmol) in CH<sub>3</sub>CN (2 mL) were added CHCl<sub>3</sub> (24 mg, 0.2 mmol) and DBU (46 mg, 0.3 mmol). The mixture was stirred at 25 °C under air atmosphere for 3 h (Figure S1). The reaction mixture was then concentrated under reduced pressure. The crude product was purified by flash column chromatography on silica gel with petroleum ether/ethyl acetate (2:1) to afford ethyl diphenylphosphinate **3aa** (48 mg, 98%) as a colorless oil.

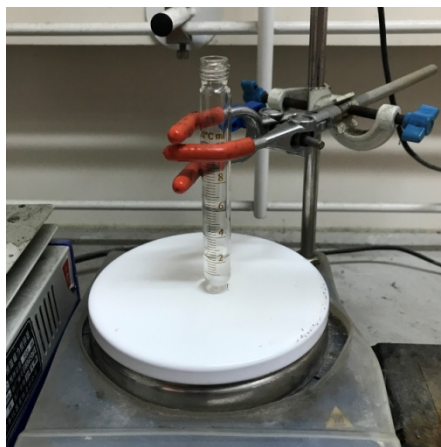

**Figure S1** The reaction setup for the general procedure.

### 2) General Procedure for the Atherton–Todd-Type Reaction in PEG-200

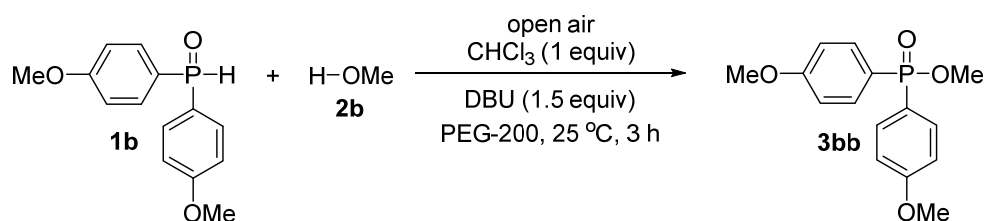

To a solution of bis(4-methoxyphenyl)phosphine oxide **1b** (52 mg, 0.2 mmol) and methanol **2b** (32 mg, 1 mmol) in PEG-200 (2 mL) were added CHCl<sub>3</sub> (24 mg, 0.2

mmol) and DBU (46 mg, 0.3 mmol). The mixture was stirred at 25 °C under air atmosphere for 3 h (Figure S1). The reaction mixture was quenched with saturated aqueous NaCl solution (20 mL), and the resulting mixture was then extracted with ethyl acetate (3×20 mL). The combined organic layers were dried over anhydrous Na<sub>2</sub>SO<sub>4</sub> and concentrated under reduced pressure. The crude product was purified by flash column chromatography on silica gel with petroleum ether/ethyl acetate (2:1) to afford methyl bis(4-methoxyphenyl)phosphinate **3bb** (58 mg, 99%) as a colorless oil.

### 3) Large-Scale Synthesis

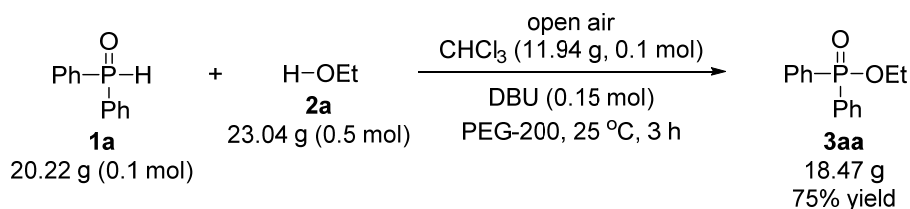

To a solution of diphenylphosphine oxide **1a** (20.22 g, 0.10 mol) and ethanol **2a** (23.04 g, 0.50 mol) in PEG-200 (100 mL) were added CHCl<sub>3</sub> (11.94 g, 0.10 mol) and DBU (22.84 g, 0.15 mol). The mixture was stirred at 25 °C under air atmosphere for 3 h. The reaction mixture was quenched with saturated aqueous NaCl solution (1 L), and the resulting mixture was then extracted with ethyl acetate (3×1 L). The combined organic layers were dried over anhydrous Na<sub>2</sub>SO<sub>4</sub> and concentrated under reduced pressure. The crude product was purified by flash column chromatography on silica gel with petroleum ether/ethyl acetate (2:1) to afford ethyl diphenylphosphinate **3aa** (18.47 g, 75%) as a colorless oil.

## 5. Analytic Data for Products

The known compounds **3aa**,<sup>2</sup> **3ab**,<sup>2</sup> **3ac**,<sup>2</sup> **3ad**,<sup>2</sup> **3ae**,<sup>2</sup> **3af**,<sup>3</sup> **3ag**,<sup>3</sup> **3ah**,<sup>3</sup> **3ai**,<sup>4</sup> **3aj**,<sup>2</sup> **3ak**,<sup>3</sup> **3an**,<sup>5</sup> **3ao**,<sup>5</sup> **3ap**,<sup>6</sup> **3ar**,<sup>6</sup> **3as**,<sup>7</sup> **3at**,<sup>7</sup> **3au**,<sup>7</sup> **3av**,<sup>6</sup> **3bb**,<sup>2</sup> **3cb**,<sup>2</sup> **3eb**,<sup>2</sup> **3fb**,<sup>2</sup> **3gb**,<sup>2</sup> **3hb**,<sup>8</sup> **3ib**,<sup>2</sup> **3kb**,<sup>2</sup> **3mb**,<sup>2</sup> **3ob**,<sup>2</sup> **5a**,<sup>9</sup> **5b**,<sup>10</sup> **5c**,<sup>11</sup> **5d**,<sup>12</sup> **5e**,<sup>13</sup> **5f**,<sup>14</sup> **5h**,<sup>15</sup> **5i**,<sup>15</sup> **5j**,<sup>16</sup> and **5l**<sup>16</sup> showed characterization data in full agreement with previously reported data.

### Ethyl Diphenylphosphinate (**3aa**)<sup>2</sup>.

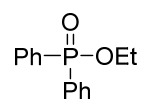

Colorless oil (48 mg, 98%): <sup>1</sup>H NMR (400 MHz, CDCl<sub>3</sub>) δ 7.84–7.77 (m, 4H), 7.53–7.47 (m, 2H), 7.46–7.40 (m, 4H), 4.14–4.05 (m, 2H), 1.36 (t, *J* = 7.1 Hz, 3H); <sup>13</sup>C NMR (100 MHz, CDCl<sub>3</sub>) δ 132.1 (d, *J* = 2.8 Hz), 131.7 (d, *J* = 136 Hz), 131.6 (d, *J* = 10.1 Hz), 128.5 (d, *J* = 13.1 Hz), 61.1 (d, *J* = 5.9 Hz), 16.5 (d, *J* = 6.7 Hz); <sup>31</sup>P NMR (162 MHz, CDCl<sub>3</sub>) δ 31.4.

### Methyl Diphenylphosphinate (**3ab**)<sup>2</sup>.

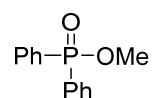

Colorless oil (46 mg, 99%): <sup>1</sup>H NMR (400 MHz, CDCl<sub>3</sub>) δ 7.84–7.77 (m, 4H), 7.55–7.49 (m, 2H), 7.48–7.41 (m, 4H), 3.76 (d, *J* = 11.1 Hz, 3H); <sup>13</sup>C NMR (100 MHz, CDCl<sub>3</sub>) δ 132.2 (d, *J* = 2.8 Hz), 131.7 (d, *J* = 10.1 Hz), 131.1 (d, *J* = 136 Hz), 128.6 (d, *J* = 13.1 Hz), 51.5 (d, *J* = 6.0 Hz); <sup>31</sup>P NMR (162 MHz, CDCl<sub>3</sub>) δ 33.3.

### Propyl Diphenylphosphinate (**3ac**)<sup>2</sup>.

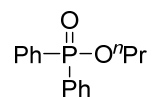

Colorless oil (48 mg, 92%): <sup>1</sup>H NMR (400 MHz, CDCl<sub>3</sub>) δ 7.86–7.76 (m, 4H), 7.55–7.48 (m, 2H), 7.47–7.42 (m, 4H), 3.99 (q, *J* = 6.7 Hz, 2H), 1.79–1.70 (m, 2H),

0.98 (t,  $J = 7.4$  Hz, 3H);  $^{13}\text{C}$  NMR (100 MHz,  $\text{CDCl}_3$ )  $\delta$  132.1 (d,  $J = 2.8$  Hz), 131.7 (d,  $J = 137$  Hz), 131.6 (d,  $J = 10.1$  Hz), 128.5 (d,  $J = 13.1$  Hz), 66.5 (d,  $J = 6.1$  Hz), 23.9 (d,  $J = 6.7$  Hz), 10.2;  $^{31}\text{P}$  NMR (162 MHz,  $\text{CDCl}_3$ )  $\delta$  31.1.

### Butyl Diphenylphosphinate (3ad)<sup>2</sup>.

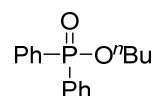

Colorless oil (53 mg, 97%):  $^1\text{H}$  NMR (400 MHz,  $\text{CDCl}_3$ )  $\delta$  7.82–7.77 (m, 4H), 7.53–7.38 (m, 6H), 4.01 (q,  $J = 6.6$  Hz, 2H), 1.79–1.62 (m, 2H), 1.47–1.37 (m, 2H), 0.90 (t,  $J = 7.4$  Hz, 3H);  $^{13}\text{C}$  NMR (100 MHz,  $\text{CDCl}_3$ )  $\delta$  132.0 (d,  $J = 2.8$  Hz), 131.7 (d,  $J = 137$  Hz), 131.6 (d,  $J = 10.1$  Hz), 128.5 (d,  $J = 13.1$  Hz), 64.7 (d,  $J = 6.0$  Hz), 32.6 (d,  $J = 6.7$  Hz), 18.9, 13.6;  $^{31}\text{P}$  NMR (162 MHz,  $\text{CDCl}_3$ )  $\delta$  31.1.

### Pentyl Diphenylphosphinate (3ae)<sup>2</sup>.

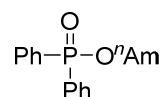

Colorless oil (51 mg, 88%):  $^1\text{H}$  NMR (400 MHz,  $\text{CDCl}_3$ )  $\delta$  7.86–7.74 (m, 4H), 7.56–7.38 (m, 6H), 4.01 (q,  $J = 6.7$  Hz, 2H), 1.75–1.68 (m, 2H), 1.44–1.25 (m, 4H), 0.88 (t,  $J = 7.1$  Hz, 3H);  $^{13}\text{C}$  NMR (100 MHz,  $\text{CDCl}_3$ )  $\delta$  132.1 (d,  $J = 2.8$  Hz), 131.7 (d,  $J = 137$  Hz), 131.6 (d,  $J = 10.1$  Hz), 128.5 (d,  $J = 13.1$  Hz), 65.0 (d,  $J = 6.1$  Hz), 30.2 (d,  $J = 6.6$  Hz), 27.8, 22.2, 13.9;  $^{31}\text{P}$  NMR (162 MHz,  $\text{CDCl}_3$ )  $\delta$  31.2.

### Phenethyl Diphenylphosphinate (3af)<sup>3</sup>.

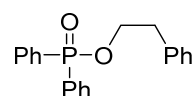

Colorless oil (63 mg, 98%):  $^1\text{H}$  NMR (400 MHz,  $\text{CDCl}_3$ )  $\delta$  7.73–7.62 (m, 4H), 7.51–7.44 (m, 2H), 7.42–7.34 (m, 4H), 7.30–7.15 (m, 5H), 4.20 (q,  $J = 6.8$  Hz, 2H), 3.02 (t,  $J = 6.9$  Hz, 2H);  $^{13}\text{C}$  NMR (100 MHz,  $\text{CDCl}_3$ )  $\delta$  137.5, 132.1 (d,  $J = 2.8$  Hz), 131.6 (d,  $J = 10.2$  Hz), 131.3 (d,  $J = 136$  Hz), 129.1, 128.6, 128.5 (d,  $J = 4.9$  Hz),

126.6, 65.4 (d,  $J = 6.0$  Hz), 37.1 (d,  $J = 7.0$  Hz);  $^{31}\text{P}$  NMR (162 MHz,  $\text{CDCl}_3$ )  $\delta$  31.6.

### Benzyl Diphenylphosphinate (**3ag**)<sup>3</sup>.

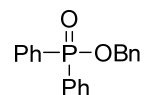

Colorless oil (55 mg, 90%):  $^1\text{H}$  NMR (400 MHz,  $\text{CDCl}_3$ )  $\delta$  7.88–7.78 (m, 4H), 7.54–7.50 (m, 2H), 7.47–7.42 (m, 4H), 7.39–7.28 (m, 5H), 5.07 (d,  $J = 6.8$  Hz, 2H);  $^{13}\text{C}$  NMR (100 MHz,  $\text{CDCl}_3$ )  $\delta$  136.4 (d,  $J = 7.5$  Hz), 132.2 (d,  $J = 2.8$  Hz), 131.7 (d,  $J = 10.2$  Hz), 131.3 (d,  $J = 137$  Hz), 128.6 (d,  $J = 13.1$  Hz), 128.5, 128.2, 127.8, 66.3 (d,  $J = 5.5$  Hz);  $^{31}\text{P}$  NMR (162 MHz,  $\text{CDCl}_3$ )  $\delta$  32.4.

### Allyl Diphenylphosphinate (**3ah**)<sup>3</sup>.

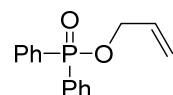

Colorless oil (51 mg, 99%):  $^1\text{H}$  NMR (400 MHz,  $\text{CDCl}_3$ )  $\delta$  7.91–7.73 (m, 4H), 7.54–7.47 (m, 2H), 7.47–7.36 (m, 4H), 6.03–5.88 (m, 1H), 5.37–5.32 (m, 1H), 5.23–5.19 (m, 1H), 4.54–4.50 (m, 2H);  $^{13}\text{C}$  NMR (100 MHz,  $\text{CDCl}_3$ )  $\delta$  133.0 (d,  $J = 7.3$  Hz), 132.2 (d,  $J = 2.8$  Hz), 131.6 (d,  $J = 10.2$  Hz), 131.4 (d,  $J = 137$  Hz), 128.6 (d,  $J = 13.2$  Hz), 117.9, 65.3 (d,  $J = 5.5$  Hz);  $^{31}\text{P}$  NMR (162 MHz,  $\text{CDCl}_3$ )  $\delta$  32.2.

### Prop-2-yn-1-yl Diphenylphosphinate (**3ai**)<sup>4</sup>.

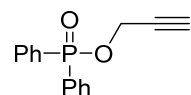

Colorless oil (50 mg, 99%):  $^1\text{H}$  NMR (400 MHz,  $\text{CDCl}_3$ )  $\delta$  7.87–7.73 (m, 4H), 7.53–7.46 (m, 2H), 7.44–7.40 (m, 4H), 4.66 (dd,  $J = 6.8, 2.4$  Hz, 2H), 2.47 (t,  $J = 2.5$  Hz, 1H);  $^{13}\text{C}$  NMR (100 MHz,  $\text{CDCl}_3$ )  $\delta$  132.5 (d,  $J = 2.8$  Hz), 131.7 (d,  $J = 10.4$  Hz), 130.7 (d,  $J = 137$  Hz), 128.6 (d,  $J = 13.3$  Hz), 78.0 (d,  $J = 8.9$  Hz), 75.8, 52.4 (d,  $J = 4.6$  Hz);  $^{31}\text{P}$  NMR (162 MHz,  $\text{CDCl}_3$ )  $\delta$  34.1.

### Isopropyl Diphenylphosphinate (3aj)<sup>2</sup>.

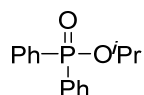

Colorless oil (21 mg, 41%): <sup>1</sup>H NMR (400 MHz, CDCl<sub>3</sub>) δ 7.85–7.77 (m, 4H), 7.53–7.46 (m, 2H), 7.46–7.39 (m, 4H), 4.73–4.60 (m, 1H), 1.34 (d, *J* = 6.1 Hz, 6H); <sup>13</sup>C NMR (100 MHz, CDCl<sub>3</sub>) δ 132.4 (d, *J* = 136 Hz), 131.9 (d, *J* = 2.7 Hz), 131.6 (d, *J* = 10.1 Hz), 128.4 (d, *J* = 13.1 Hz), 70.2 (d, *J* = 6.0 Hz), 24.3 (d, *J* = 4.2 Hz); <sup>31</sup>P NMR (162 MHz, CDCl<sub>3</sub>) δ 29.8.

### Cyclohexyl Diphenylphosphinate (3ak)<sup>3</sup>.

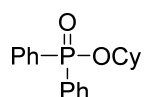

Colorless oil (19 mg, 31%): <sup>1</sup>H NMR (400 MHz, CDCl<sub>3</sub>) δ 7.88–7.74 (m, 4H), 7.53–7.38 (m, 6H), 4.46–4.37 (m, 1H), 1.90–1.87 (m, 2H), 1.77–1.67 (m, 2H), 1.67–1.54 (m, 2H), 1.51–1.40 (m, 1H), 1.35–1.18 (m, 3H); <sup>13</sup>C NMR (100 MHz, CDCl<sub>3</sub>) δ 132.6 (d, *J* = 137 Hz), 131.9 (d, *J* = 2.8 Hz), 131.6 (d, *J* = 10.1 Hz), 128.4 (d, *J* = 13.1 Hz), 75.0 (d, *J* = 6.1 Hz), 33.9 (d, *J* = 3.6 Hz), 25.2, 23.6; <sup>31</sup>P NMR (162 MHz, CDCl<sub>3</sub>) δ 29.7.

### (3*S*,5*S*,8*R*,9*S*,10*S*,13*R*,14*S*,17*R*)-10,13-Dimethyl-17-((*R*)-6-methylheptan-2-yl)hexadecahydro-1*H*-cyclopenta[*a*]phenanthren-3-yl Diphenylphosphinate (3al).

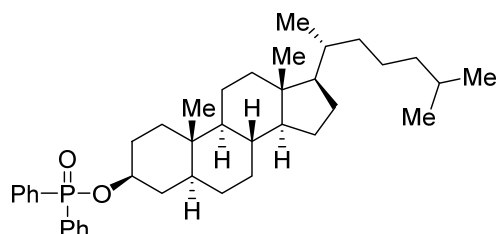

White amorphous solid (47 mg, 40%): <sup>1</sup>H NMR (400 MHz, CDCl<sub>3</sub>) δ 7.86–7.75 (m, 4H), 7.53–7.39 (m, 6H), 4.37–4.27 (m, 1H), 1.98–1.85 (m, 3H), 1.84–0.93 (m, 28H), 0.88 (d, *J* = 6.5 Hz, 3H), 0.86 (d, *J* = 1.8 Hz, 3H), 0.84 (d, *J* = 1.8 Hz, 3H), 0.82 (s, 3H), 0.63 (s, 3H); <sup>13</sup>C NMR (100 MHz, CDCl<sub>3</sub>) δ 132.6 (d, *J* = 135 Hz), 132.5 (d, *J* =

135 Hz), 131.9 (d,  $J = 2.6$  Hz), 131.6 (d,  $J = 10.0$  Hz), 131.6 (d,  $J = 10.0$  Hz), 128.4 (d,  $J = 13.0$  Hz), 76.2 (d,  $J = 6.3$  Hz), 56.3 (d,  $J = 13.9$  Hz), 54.2, 44.7, 42.6, 40.0, 39.5, 36.8, 36.6 (d,  $J = 3.5$  Hz), 36.2, 35.8, 35.4, 35.3, 31.9, 30.1 (d,  $J = 3.8$  Hz), 28.5, 28.2, 28.0, 24.2, 23.8, 22.8, 22.6, 21.2, 18.7, 12.3, 12.1;  $^{31}\text{P}$  NMR (162 MHz,  $\text{CDCl}_3$ )  $\delta$  29.9; HRMS (ESI-Orbitrap)  $m/z$ :  $[\text{M} + \text{Na}]^+$  calcd for  $\text{C}_{39}\text{H}_{57}\text{O}_2\text{PNa}$  611.3981, found 611.3989.

### Phenyl Diphenylphosphinate (3an)<sup>5</sup>.

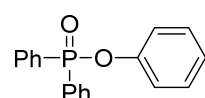

White amorphous solid (57 mg, 97%):  $^1\text{H}$  NMR (400 MHz,  $\text{CDCl}_3$ )  $\delta$  7.97–7.87 (m, 4H), 7.60–7.43 (m, 6H), 7.29–7.22 (m, 4H), 7.15–7.05 (m, 1H);  $^{13}\text{C}$  NMR (100 MHz,  $\text{CDCl}_3$ )  $\delta$  150.9 (d,  $J = 8.2$  Hz), 132.4 (d,  $J = 2.9$  Hz), 131.8 (d,  $J = 10.4$  Hz), 131.0 (d,  $J = 138$  Hz), 129.6, 128.6 (d,  $J = 13.5$  Hz), 124.6, 120.7 (d,  $J = 4.8$  Hz);  $^{31}\text{P}$  NMR (162 MHz,  $\text{CDCl}_3$ )  $\delta$  30.4.

### 4-Methoxyphenyl Diphenylphosphinate (3ao)<sup>5</sup>.

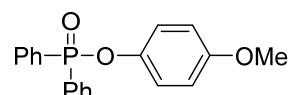

White amorphous solid (64 mg, 99%):  $^1\text{H}$  NMR (400 MHz,  $\text{CDCl}_3$ )  $\delta$  7.91–7.85 (m, 4H), 7.55–7.47 (m, 2H), 7.47–7.40 (m, 4H), 7.10 (dd,  $J = 9.1, 1.2$  Hz, 2H), 6.73 (d,  $J = 9.0$  Hz, 2H), 3.69 (s, 3H);  $^{13}\text{C}$  NMR (100 MHz,  $\text{CDCl}_3$ )  $\delta$  156.4, 144.3 (d,  $J = 8.4$  Hz), 132.5 (d,  $J = 2.8$  Hz), 131.8 (d,  $J = 10.4$  Hz), 130.9 (d,  $J = 138$  Hz), 128.6 (d,  $J = 13.4$  Hz), 121.7 (d,  $J = 4.5$  Hz), 114.6, 55.5;  $^{31}\text{P}$  NMR (162 MHz,  $\text{CDCl}_3$ )  $\delta$  30.7.

### 3-Methoxyphenyl Diphenylphosphinate (3ap)<sup>6</sup>.

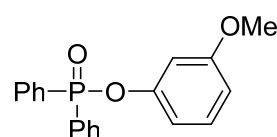

Colorless oil (64 mg, 99%):  $^1\text{H}$  NMR (400 MHz,  $\text{CDCl}_3$ )  $\delta$  7.94–7.83 (m, 4H), 7.58–7.50 (m, 2H), 7.50–7.41 (m, 4H), 7.11 (dd,  $J = 8.4, 8.0$  Hz, 1H), 6.82–6.73 (m, 2H), 6.66–6.59 (m, 1H), 3.71 (s, 3H);  $^{13}\text{C}$  NMR (100 MHz,  $\text{CDCl}_3$ )  $\delta$  160.6, 151.8 (d,  $J = 8.0$  Hz), 132.5 (d,  $J = 2.8$  Hz), 131.8 (d,  $J = 10.4$  Hz), 131.0 (d,  $J = 138$  Hz), 129.9, 128.6 (d,  $J = 13.5$  Hz), 112.9 (d,  $J = 4.7$  Hz), 110.7, 106.7 (d,  $J = 5.1$  Hz), 55.4;  $^{31}\text{P}$  NMR (162 MHz,  $\text{CDCl}_3$ )  $\delta$  31.0.

### 3,4-Dimethoxyphenyl Diphenylphosphinate (3aq).

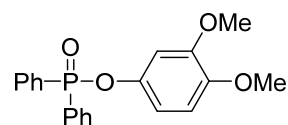

Colorless oil (67 mg, 95%):  $^1\text{H}$  NMR (400 MHz,  $\text{CDCl}_3$ )  $\delta$  7.91–7.88 (m, 4H), 7.58–7.40 (m, 6H), 6.75 (s, 1H), 6.70–6.66 (m, 2H), 3.78 (s, 3H), 3.75 (s, 3H);  $^{13}\text{C}$  NMR (100 MHz,  $\text{CDCl}_3$ )  $\delta$  149.4, 146.0, 144.5 (d,  $J = 8.4$  Hz), 132.4 (d,  $J = 2.9$  Hz), 131.8 (d,  $J = 10.3$  Hz), 130.9 (d,  $J = 138$  Hz), 128.6 (d,  $J = 13.4$  Hz), 112.0 (d,  $J = 4.7$  Hz), 111.4, 105.4 (d,  $J = 4.5$  Hz), 56.1, 55.9;  $^{31}\text{P}$  NMR (162 MHz,  $\text{CDCl}_3$ )  $\delta$  30.6; HRMS (ESI-Orbitrap)  $m/z$ :  $[\text{M} + \text{Na}]^+$  calcd for  $\text{C}_{20}\text{H}_{19}\text{O}_4\text{PNa}$  377.0913, found 377.0908.

### *m*-Tolyl Diphenylphosphinate (3ar)<sup>6</sup>.

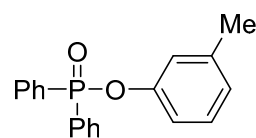

Yellow oil (61 mg, 99%):  $^1\text{H}$  NMR (400 MHz,  $\text{CDCl}_3$ )  $\delta$  7.96–7.82 (m, 4H), 7.54–7.48 (m, 2H), 7.48–7.40 (m, 4H), 7.11–7.07 (m, 1H), 7.05 (s, 1H), 6.97 (d,  $J = 8.2$  Hz, 1H), 6.87 (d,  $J = 7.5$  Hz, 1H), 2.25 (s, 3H);  $^{13}\text{C}$  NMR (100 MHz,  $\text{CDCl}_3$ )  $\delta$  150.8 (d,  $J = 8.3$  Hz), 139.9, 132.4 (d,  $J = 2.8$  Hz), 131.8 (d,  $J = 10.3$  Hz), 131.1 (d,  $J = 138$  Hz), 129.3, 128.6 (d,  $J = 13.4$  Hz), 125.4, 121.4 (d,  $J = 4.8$  Hz), 117.6 (d,  $J = 4.8$  Hz), 21.3;  $^{31}\text{P}$  NMR (162 MHz,  $\text{CDCl}_3$ )  $\delta$  30.1.



### 3,4-Dimethylphenyl Diphenylphosphinate (3as)<sup>7</sup>.

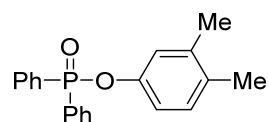

White amorphous solid (64 mg, 99%): <sup>1</sup>H NMR (400 MHz, CDCl<sub>3</sub>) δ 7.92–7.87 (m, 4H), 7.54–7.38 (m, 6H), 7.02 (s, 1H), 6.95 (d, *J* = 8.2 Hz, 1H), 6.90 (d, *J* = 8.3 Hz, 1H), 2.15 (s, 3H), 2.12 (s, 3H); <sup>13</sup>C NMR (100 MHz, CDCl<sub>3</sub>) δ 148.8 (d, *J* = 8.3 Hz), 138.1, 132.8, 132.3 (d, *J* = 2.8 Hz), 131.8 (d, *J* = 10.3 Hz), 131.3 (d, *J* = 138 Hz), 130.4, 128.5 (d, *J* = 13.4 Hz), 121.8 (d, *J* = 4.7 Hz), 117.7 (d, *J* = 4.7 Hz), 19.8, 19.0; <sup>31</sup>P NMR (162 MHz, CDCl<sub>3</sub>) δ 29.9.

### 4-Bromophenyl Diphenylphosphinate (3at)<sup>7</sup>.

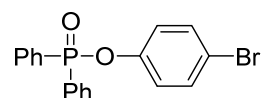

White amorphous solid (35 mg, 47%): <sup>1</sup>H NMR (400 MHz, CDCl<sub>3</sub>) δ 7.93–7.81 (m, 4H), 7.59–7.51 (m, 2H), 7.50–7.42 (m, 4H), 7.37–7.30 (m, 2H), 7.13–7.05 (m, 2H); <sup>13</sup>C NMR (100 MHz, CDCl<sub>3</sub>) δ 150.0 (d, *J* = 8.2 Hz), 132.7, 132.6, 131.8 (d, *J* = 10.4 Hz), 130.5 (d, *J* = 138 Hz), 128.7 (d, *J* = 13.5 Hz), 122.5 (d, *J* = 4.8 Hz), 117.6 (d, *J* = 1.1 Hz); <sup>31</sup>P NMR (162 MHz, CDCl<sub>3</sub>) δ 31.3.

### 4-Chlorophenyl Diphenylphosphinate(3au)<sup>7</sup>.

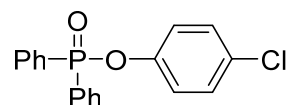

White amorphous solid (20 mg, 30%): <sup>1</sup>H NMR (400 MHz, CDCl<sub>3</sub>) δ 7.96–7.80 (m, 4H), 7.62–7.41 (m, 6H), 7.23–7.17 (m, 2H), 7.15–7.13 (m, 2H); <sup>13</sup>C NMR (100 MHz, CDCl<sub>3</sub>) δ 149.4 (d, *J* = 8.2 Hz), 132.7 (d, *J* = 2.8 Hz), 131.8 (d, *J* = 10.4 Hz), 130.5 (d, *J* = 138 Hz), 129.7, 128.7 (d, *J* = 13.5 Hz), 122.1 (d, *J* = 4.8 Hz), 116.8; <sup>31</sup>P NMR (162 MHz, CDCl<sub>3</sub>) δ 31.3.

### Naphthalen-2-yl Diphenylphosphinate (3av)<sup>6</sup>.

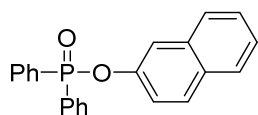

White amorphous solid (68 mg, 99%): <sup>1</sup>H NMR (400 MHz, CDCl<sub>3</sub>) δ 8.01–7.86 (m, 4H), 7.77–7.66 (m, 4H), 7.56–7.31 (m, 9H); <sup>13</sup>C NMR (100 MHz, CDCl<sub>3</sub>) δ 148.6 (d, *J* = 8.4 Hz), 133.9, 132.5 (d, *J* = 2.8 Hz), 131.9, 131.8, 130.9 (d, *J* = 138 Hz), 130.7, 129.8, 128.7 (d, *J* = 13.5 Hz), 127.6 (d, *J* = 10.0 Hz), 126.6, 125.3, 120.7 (d, *J* = 4.9 Hz), 117.2 (d, *J* = 5.1 Hz); <sup>31</sup>P NMR (162 MHz, CDCl<sub>3</sub>) δ 30.8.

### 2,3-Dihydroxypropyl Diphenylphosphinate and 1,3-Dihydroxypropan-2-yl Diphenylphosphinate (3aw).

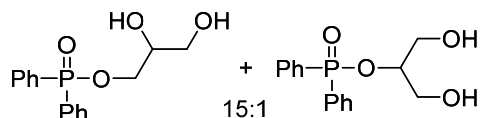

Colorless oil (56 mg, 96%), two isomers in ~15:1 ratio: <sup>1</sup>H NMR (400 MHz, CDCl<sub>3</sub>) major product: δ 7.85–7.75 (m, 4H), 7.60–7.51 (m, 2H), 7.50–7.41 (m, 4H), 4.11 (dd, *J* = 11.0, 5.0 Hz, 2H), 3.97–3.93 (m, 1H), 3.71 (d, *J* = 4.7 Hz, 2H), 2.84 (br, 2H); <sup>13</sup>C NMR (100 MHz, CDCl<sub>3</sub>) major product: δ 132.7 (d, *J* = 2.7 Hz), 132.6 (d, *J* = 2.6 Hz), 131.7 (d, *J* = 10.3 Hz), 131.6 (d, *J* = 10.3 Hz), 130.2 (d, *J* = 138 Hz), 130.1 (d, *J* = 137 Hz), 128.8 (d, *J* = 13.3 Hz), 128.7 (d, *J* = 13.3 Hz), 70.8 (d, *J* = 3.4 Hz), 67.2 (d, *J* = 6.3 Hz), 62.7; <sup>31</sup>P NMR (162 MHz, CDCl<sub>3</sub>) major product: δ 36.2; HRMS (ESI-Orbitrap) *m/z*: [M + Na]<sup>+</sup> calcd for C<sub>15</sub>H<sub>17</sub>O<sub>4</sub>PNa 315.0757, found 315.0755.

### Methyl Bis(4-methoxyphenyl)phosphinate (3bb)<sup>2</sup>.

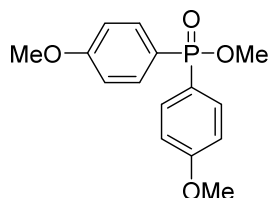

Colorless oil (58 mg, 99%): <sup>1</sup>H NMR (400 MHz, CDCl<sub>3</sub>) δ 7.70 (dd, *J* = 11.7, 8.5 Hz, 4H), 6.93 (dd, *J* = 8.7, 2.5 Hz, 4H), 3.81 (s, 6H), 3.70 (d, *J* = 11.2 Hz, 3H); <sup>13</sup>C NMR (100 MHz, CDCl<sub>3</sub>) δ 162.5 (d, *J* = 3.1 Hz), 133.4 (d, *J* = 11.4 Hz), 122.7 (d, *J* = 145

Hz), 114.0 (d,  $J = 14.2$  Hz), 55.3, 51.2 (d,  $J = 5.9$  Hz);  $^{31}\text{P}$  NMR (162 MHz,  $\text{CDCl}_3$ )  $\delta$  34.0.

**Methyl Di-*p*-tolylphosphinate (3cb)<sup>2</sup>.**

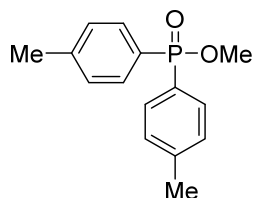

Colorless oil (48 mg, 93%):  $^1\text{H}$  NMR (400 MHz,  $\text{CDCl}_3$ )  $\delta$  7.68 (dd,  $J = 12.0, 7.7$  Hz, 4H), 7.25 (dd,  $J = 7.7, 2.4$  Hz, 4H), 3.73 (d,  $J = 11.1$  Hz, 3H), 2.37 (s, 6H);  $^{13}\text{C}$  NMR (100 MHz,  $\text{CDCl}_3$ )  $\delta$  142.6 (d,  $J = 2.9$  Hz), 131.6 (d,  $J = 10.5$  Hz), 129.2 (d,  $J = 13.5$  Hz), 127.9 (d,  $J = 140$  Hz), 51.4 (d,  $J = 6.0$  Hz), 21.6;  $^{31}\text{P}$  NMR (162 MHz,  $\text{CDCl}_3$ )  $\delta$  34.3.

**Methyl Di([1,1'-biphenyl]-4-yl)phosphinate (3db).**

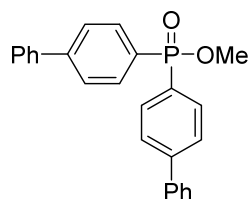

White amorphous solid (65 mg, 85%):  $^1\text{H}$  NMR (400 MHz,  $\text{CDCl}_3$ )  $\delta$  7.94 (dd,  $J = 11.9, 8.3$  Hz, 4H), 7.70 (dd,  $J = 8.3, 3.2$  Hz, 4H), 7.63–7.56 (m, 4H), 7.48–7.42 (m, 4H), 7.41–7.35 (m, 2H), 3.83 (d,  $J = 11.2$  Hz, 3H);  $^{13}\text{C}$  NMR (100 MHz,  $\text{CDCl}_3$ )  $\delta$  144.9 (d,  $J = 2.9$  Hz), 139.8, 132.1 (d,  $J = 10.5$  Hz), 129.5 (d,  $J = 139$  Hz), 128.8, 128.0, 127.3, 127.1, 51.5 (d,  $J = 6.0$  Hz);  $^{31}\text{P}$  NMR (162 MHz,  $\text{CDCl}_3$ )  $\delta$  33.3; HRMS (ESI-Orbitrap)  $m/z$ :  $[\text{M} + \text{Na}]^+$  calcd for  $\text{C}_{25}\text{H}_{21}\text{O}_2\text{PNa}$  407.1171, found 407.1169.

**Methyl Bis(4-chlorophenyl)phosphinate (3eb)<sup>2</sup>.**

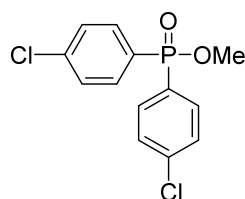

Yellow oil (57 mg, 95%):  $^1\text{H}$  NMR (400 MHz,  $\text{CDCl}_3$ )  $\delta$  7.76–7.68 (m, 4H), 7.47–7.40 (m, 4H), 3.76 (d,  $J = 11.2$  Hz, 3H);  $^{13}\text{C}$  NMR (100 MHz,  $\text{CDCl}_3$ )  $\delta$  139.1 (d,  $J = 3.5$  Hz), 133.0 (d,  $J = 11.0$  Hz), 129.2 (d,  $J = 139$  Hz), 129.1 (d,  $J = 13.8$  Hz), 51.7 (d,  $J = 6.0$  Hz);  $^{31}\text{P}$  NMR (162 MHz,  $\text{CDCl}_3$ )  $\delta$  31.2.

**Methyl Bis(4-fluorophenyl)phosphinate (3fb)<sup>2</sup>.**

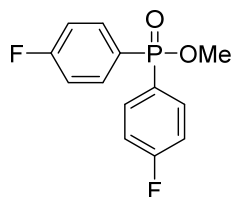

Colorless oil (50 mg, 94%):  $^1\text{H}$  NMR (400 MHz,  $\text{CDCl}_3$ )  $\delta$  7.83–7.71 (m, 4H), 7.16–7.09 (m, 4H), 3.73 (d,  $J = 11.2$  Hz, 3H);  $^{13}\text{C}$  NMR (100 MHz,  $\text{CDCl}_3$ )  $\delta$  165.2 (dd,  $J = 254, 3.5$  Hz), 134.1 (dd,  $J = 11.5, 8.9$  Hz), 126.8 (dd,  $J = 142, 3.4$  Hz), 116.0 (dd,  $J = 21.4, 14.4$  Hz), 51.5 (d,  $J = 6.0$  Hz);  $^{31}\text{P}$  NMR (162 MHz,  $\text{CDCl}_3$ )  $\delta$  31.3;  $^{19}\text{F}$  NMR (376 MHz,  $\text{CDCl}_3$ )  $\delta$  -105.9 (d,  $J = 1.2$  Hz).

**Methyl Bis(4-(trifluoromethyl)phenyl)phosphinate (3gb)<sup>2</sup>.**

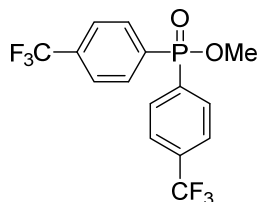

Colorless oil (55 mg, 75%):  $^1\text{H}$  NMR (400 MHz,  $\text{CDCl}_3$ )  $\delta$  7.94 (dd,  $J = 11.9, 8.1$  Hz, 4H), 7.73 (dd,  $J = 8.2, 2.6$  Hz, 4H), 3.82 (d,  $J = 11.2$  Hz, 3H);  $^{13}\text{C}$  NMR (100 MHz,  $\text{CDCl}_3$ )  $\delta$  134.6 (d,  $J = 137$  Hz), 134.4 (dd,  $J = 32.8, 3.1$  Hz), 132.2 (d,  $J = 10.5$  Hz), 125.7 (dq,  $J = 13.3, 3.7$  Hz), 123.4 (d,  $J = 272$  Hz), 52.0 (d,  $J = 6.0$  Hz);  $^{31}\text{P}$  NMR (162 MHz,  $\text{CDCl}_3$ )  $\delta$  29.3;  $^{19}\text{F}$  NMR (376 MHz,  $\text{CDCl}_3$ )  $\delta$  -63.4.

**Methyl Bis(3-methoxyphenyl)phosphinate (3hb)<sup>8</sup>.**

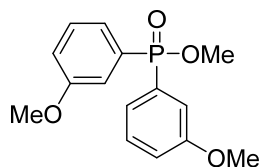

Colorless oil (58 mg, 99%): <sup>1</sup>H NMR (400 MHz, CDCl<sub>3</sub>) δ 7.39–7.31 (m, 6H), 7.08–7.02 (m, 2H), 3.82 (s, 6H), 3.77 (d, *J* = 11.2 Hz, 3H); <sup>13</sup>C NMR (100 MHz, CDCl<sub>3</sub>) δ 159.6 (d, *J* = 16.5 Hz), 132.3 (d, *J* = 135 Hz), 129.8 (d, *J* = 15.5 Hz), 123.8 (d, *J* = 9.8 Hz), 118.5 (d, *J* = 2.8 Hz), 116.4 (d, *J* = 11.3 Hz), 55.4, 51.6 (d, *J* = 6.1 Hz); <sup>31</sup>P NMR (162 MHz, CDCl<sub>3</sub>) δ 33.2.

**Methyl Di-*m*-tolylphosphinate (3ib)<sup>2</sup>.**

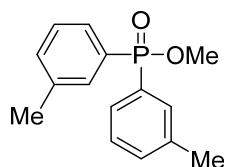

Colorless oil (47 mg, 91%): <sup>1</sup>H NMR (400 MHz, CDCl<sub>3</sub>) δ 7.62 (d, *J* = 12.7 Hz, 2H), 7.55 (dd, *J* = 12.7, 5.6 Hz, 2H), 7.33–7.26 (m, 4H), 3.72 (d, *J* = 11.1 Hz, 3H), 2.34 (s, 6H); <sup>13</sup>C NMR (100 MHz, CDCl<sub>3</sub>) δ 138.3 (d, *J* = 13.1 Hz), 132.8 (d, *J* = 2.9 Hz), 132.0 (d, *J* = 10.1 Hz), 130.8 (d, *J* = 136 Hz), 128.5 (d, *J* = 10.0 Hz), 128.3 (d, *J* = 13.8 Hz), 51.4 (d, *J* = 6.1 Hz), 21.2; <sup>31</sup>P NMR (162 MHz, CDCl<sub>3</sub>) δ 33.9.

**Methyl Bis(3-fluorophenyl)phosphinate (3jb).**

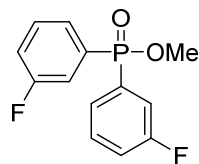

Colorless oil (49 mg, 91%): <sup>1</sup>H NMR (400 MHz, CDCl<sub>3</sub>) δ 7.65–7.53 (m, 2H), 7.53–7.38 (m, 4H), 7.26–7.20 (m, 2H), 3.78 (d, *J* = 9.8 Hz, 3H); <sup>13</sup>C NMR (100 MHz, CDCl<sub>3</sub>) δ 162.6 (dd, *J* = 250, 18.7 Hz), 133.2 (dd, *J* = 138, 5.6 Hz), 130.8 (dd, *J* = 15.4, 7.4 Hz), 127.4 (dd, *J* = 9.5, 3.2 Hz), 119.7 (dd, *J* = 21.2, 2.3 Hz), 118.5 (dd, *J* =

22.3, 10.8 Hz), 51.9 (d,  $J = 5.9$  Hz);  $^{31}\text{P}$  NMR (162 MHz,  $\text{CDCl}_3$ )  $\delta$  29.9;  $^{19}\text{F}$  NMR (376 MHz,  $\text{CDCl}_3$ )  $\delta$  -110.9 (d,  $J = 5.6$  Hz); HRMS (ESI-Orbitrap)  $m/z$ :  $[\text{M} + \text{Na}]^+$  calcd for  $\text{C}_{13}\text{H}_{11}\text{F}_2\text{O}_2\text{PNa}$  291.0357, found 291.0353.

### Methyl Di-*o*-tolylphosphinate (3kb)<sup>2</sup>.

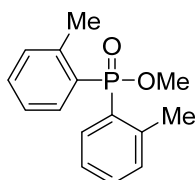

Colorless oil (51 mg, 99%):  $^1\text{H}$  NMR (400 MHz,  $\text{CDCl}_3$ )  $\delta$  7.88 (dd,  $J = 13.3, 7.7$  Hz, 2H), 7.41 (dd,  $J = 7.4, 7.4$  Hz, 2H), 7.33–7.24 (m, 2H), 7.24–7.13 (m, 2H), 3.75 (d,  $J = 11.8$  Hz, 3H), 2.35 (s, 6H);  $^{13}\text{C}$  NMR (100 MHz,  $\text{CDCl}_3$ )  $\delta$  141.7 (d,  $J = 11.1$  Hz), 133.6 (d,  $J = 10.0$  Hz), 132.3 (d,  $J = 2.7$  Hz), 131.4 (d,  $J = 12.6$  Hz), 129.5 (d,  $J = 133$  Hz), 125.5 (d,  $J = 12.7$  Hz), 51.0 (d,  $J = 5.9$  Hz), 21.1 (d,  $J = 4.2$  Hz);  $^{31}\text{P}$  NMR (162 MHz,  $\text{CDCl}_3$ )  $\delta$  34.2.

### Methyl Bis(3,5-dimethoxyphenyl)phosphinate (3lb).

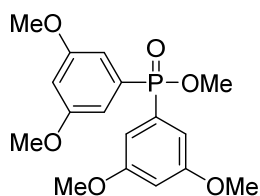

Colorless oil (67 mg, 96%):  $^1\text{H}$  NMR (400 MHz,  $\text{CDCl}_3$ )  $\delta$  6.89 (dd,  $J = 13.6, 2.3$  Hz, 4H), 6.54 (dd,  $J = 2.3, 2.3$  Hz, 2H), 3.75 (s, 12H), 3.73 (d,  $J = 11.2$  Hz, 3H);  $^{13}\text{C}$  NMR (100 MHz,  $\text{CDCl}_3$ )  $\delta$  160.8 (d,  $J = 19.6$  Hz), 132.5 (d,  $J = 137$  Hz), 109.0 (d,  $J = 11.2$  Hz), 104.5 (d,  $J = 2.5$  Hz), 55.4, 51.6 (d,  $J = 6.0$  Hz);  $^{31}\text{P}$  NMR (162 MHz,  $\text{CDCl}_3$ )  $\delta$  33.5; HRMS (ESI-Orbitrap)  $m/z$ :  $[\text{M} + \text{Na}]^+$  calcd for  $\text{C}_{17}\text{H}_{21}\text{O}_6\text{PNa}$  375.0968, found 375.0963.

### Methyl Bis(3,5-dimethylphenyl)phosphinate (3mb)<sup>2</sup>.

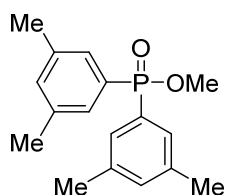

Colorless oil (55 mg, 95%): <sup>1</sup>H NMR (400 MHz, CDCl<sub>3</sub>) δ 7.42 (d, *J* = 12.5 Hz, 4H), 7.14 (s, 2H), 3.74 (d, *J* = 11.1 Hz, 3H), 2.33 (s, 12H); <sup>13</sup>C NMR (100 MHz, CDCl<sub>3</sub>) δ 138.2 (d, *J* = 13.8 Hz), 133.9 (d, *J* = 2.9 Hz), 130.9 (d, *J* = 135 Hz), 129.2 (d, *J* = 10.1 Hz), 51.4 (d, *J* = 6.0 Hz), 21.2; <sup>31</sup>P NMR (162 MHz, CDCl<sub>3</sub>) δ 34.5.

### Methyl Di(naphthalen-1-yl)phosphinate (3nb).

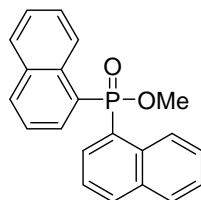

White amorphous solid (60 mg, 90%): <sup>1</sup>H NMR (400 MHz, CDCl<sub>3</sub>) δ 8.59 (dd, *J* = 6.2, 3.4 Hz, 2H), 8.13 (dd, *J* = 15.8, 7.1 Hz, 2H), 8.03 (d, *J* = 8.2 Hz, 2H), 7.89–7.86 (m, 2H), 7.54–7.48 (m, 6H), 3.85 (d, *J* = 11.3 Hz, 3H); <sup>13</sup>C NMR (100 MHz, CDCl<sub>3</sub>) δ 134.1 (d, *J* = 10.4 Hz), 133.7, 133.6 (d, *J* = 3.1 Hz), 133.0 (d, *J* = 10.3 Hz), 128.9 (d, *J* = 1.4 Hz), 127.5, 127.4 (d, *J* = 134 Hz), 126.5 (d, *J* = 4.8 Hz), 126.3, 124.6 (d, *J* = 15.0 Hz), 51.7 (d, *J* = 6.0 Hz); <sup>31</sup>P NMR (162 MHz, CDCl<sub>3</sub>) δ 36.2; HRMS (ESI-Orbitrap) *m/z*: [M + Na]<sup>+</sup> calcd for C<sub>21</sub>H<sub>17</sub>O<sub>2</sub>PNa 355.0858, found 355.0855.

### Methyl Dibenzylphosphinate (3ob)<sup>2</sup>.

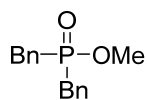

White amorphous solid (27 mg, 51%): <sup>1</sup>H NMR (400 MHz, CDCl<sub>3</sub>) δ 7.36–7.18 (m, 10H), 3.56 (d, *J* = 10.5 Hz, 3H), 3.08 (d, *J* = 16.4 Hz, 4H); <sup>13</sup>C NMR (100 MHz, CDCl<sub>3</sub>) δ 131.3 (d, *J* = 7.6 Hz), 129.8 (d, *J* = 5.8 Hz), 128.6 (d, *J* = 2.6 Hz), 126.9 (d,

$J = 3.1$  Hz), 51.8 (d,  $J = 7.0$  Hz), 35.6 (d,  $J = 87.0$  Hz);  $^{31}\text{P}$  NMR (162 MHz,  $\text{CDCl}_3$ )  $\delta$  49.2.

***N*-Hexyl-*P,P*-diphenylphosphinic Amide (5a)<sup>9</sup>.**

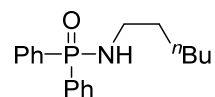

Colorless oil (59 mg, 99%):  $^1\text{H}$  NMR (400 MHz,  $\text{CDCl}_3$ )  $\delta$  7.96–7.82 (m, 4H), 7.53–7.37 (m, 6H), 2.94 (q,  $J = 7.7$  Hz, 2H), 2.19 (br, 1H), 1.59–1.52 (m, 2H), 1.38–1.13 (m, 6H), 0.85 (t,  $J = 6.9$  Hz, 3H);  $^{13}\text{C}$  NMR (100 MHz,  $\text{CDCl}_3$ )  $\delta$  132.5 (d,  $J = 130$  Hz), 132.1 (d,  $J = 9.4$  Hz), 131.8 (d,  $J = 2.6$  Hz), 128.5 (d,  $J = 12.5$  Hz), 40.8 (d,  $J = 1.7$  Hz), 32.1 (d,  $J = 7.1$  Hz), 31.4, 26.4, 22.5, 14.0;  $^{31}\text{P}$  NMR (162 MHz,  $\text{CDCl}_3$ )  $\delta$  23.6.

***N*-Phenethyl-*P,P*-diphenylphosphinic Amide (5b)<sup>10</sup>.**

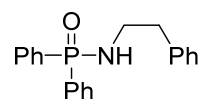

White amorphous solid (63 mg, 99%):  $^1\text{H}$  NMR (400 MHz,  $\text{CDCl}_3$ )  $\delta$  7.86–7.76 (m, 4H), 7.50–7.43 (m, 2H), 7.42–7.35 (m, 4H), 7.32–7.14 (m, 5H), 3.28–3.15 (m, 2H), 3.11–3.06 (m, 1H), 2.86 (t,  $J = 6.9$  Hz, 2H);  $^{13}\text{C}$  NMR (100 MHz,  $\text{CDCl}_3$ )  $\delta$  138.7, 131.7 (d,  $J = 122$  Hz), 132.0 (d,  $J = 9.5$  Hz), 131.6 (d,  $J = 2.9$  Hz), 128.8, 128.41, 128.40, 126.3, 42.1 (d,  $J = 1.3$  Hz), 38.3 (d,  $J = 7.1$  Hz);  $^{31}\text{P}$  NMR (162 MHz,  $\text{CDCl}_3$ )  $\delta$  23.8.

***N*-Benzyl-*P,P*-diphenylphosphinic Amide (5c)<sup>11</sup>.**

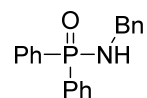

Colorless oil (60 mg, 99%):  $^1\text{H}$  NMR (400 MHz,  $\text{CDCl}_3$ )  $\delta$  8.00–7.90 (m, 4H), 7.57–7.41 (m, 6H), 7.41–7.23 (m, 5H), 4.13 (t,  $J = 7.5$  Hz, 2H), 3.50–3.44 (m, 1H);  $^{13}\text{C}$  NMR (100 MHz,  $\text{CDCl}_3$ )  $\delta$  139.7 (d,  $J = 8.2$  Hz), 132.2 (d,  $J = 129$  Hz), 132.2 (d,



$J = 9.5$  Hz), 131.9 (d,  $J = 2.7$  Hz), 128.6 (d,  $J = 4.0$  Hz), 128.5, 127.7, 127.4, 44.7;  $^{31}\text{P}$  NMR (162 MHz,  $\text{CDCl}_3$ )  $\delta$  23.8.

***N*-Isopropyl-*P,P*-diphenylphosphinic Amide (5d)**<sup>12</sup>.

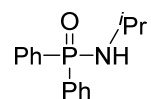

White amorphous solid (45 mg, 86%):  $^1\text{H}$  NMR (400 MHz,  $\text{CDCl}_3$ )  $\delta$  7.92–7.87 (m, 4H), 7.50–7.33 (m, 6H), 3.44–3.27 (m, 1H), 2.72 (br, 1H), 1.22 (d,  $J = 6.4$  Hz, 6H);  $^{13}\text{C}$  NMR (100 MHz,  $\text{CDCl}_3$ )  $\delta$  133.0 (d,  $J = 129$  Hz), 132.1 (d,  $J = 9.4$  Hz), 131.7 (d,  $J = 2.6$  Hz), 128.5 (d,  $J = 12.5$  Hz), 43.8, 26.2 (d,  $J = 5.5$  Hz);  $^{31}\text{P}$  NMR (162 MHz,  $\text{CDCl}_3$ )  $\delta$  21.9.

***N*-Cyclohexyl-*P,P*-diphenylphosphinic Amide (5e)**<sup>13</sup>.

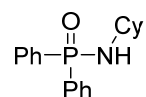

White amorphous solid (45 mg, 75%):  $^1\text{H}$  NMR (400 MHz,  $\text{CDCl}_3$ )  $\delta$  7.96–7.81 (m, 4H), 7.50–7.36 (m, 6H), 3.07–2.89 (m, 1H), 2.83–2.79 (m, 1H), 2.09–1.94 (m, 2H), 1.74–1.60 (m, 2H), 1.55–1.44 (m, 1H), 1.28–1.02 (m, 5H);  $^{13}\text{C}$  NMR (100 MHz,  $\text{CDCl}_3$ )  $\delta$  133.2 (d,  $J = 130$  Hz), 132.1 (d,  $J = 9.4$  Hz), 131.7 (d,  $J = 2.7$  Hz), 128.5 (d,  $J = 12.5$  Hz), 50.6, 36.6 (d,  $J = 4.8$  Hz), 25.3, 25.1;  $^{31}\text{P}$  NMR (162 MHz,  $\text{CDCl}_3$ )  $\delta$  22.1.

***N*-(*tert*-Butyl)-*P,P*-diphenylphosphinic Amide (5f)**<sup>14</sup>.

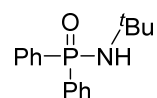

White amorphous solid (11 mg, 20%):  $^1\text{H}$  NMR (400 MHz,  $\text{CDCl}_3$ )  $\delta$  7.90–7.74 (m, 4H), 7.44–7.30 (m, 6H), 2.72 (br, 1H), 1.23 (s, 9H);  $^{13}\text{C}$  NMR (100 MHz,  $\text{CDCl}_3$ )  $\delta$  134.9 (d,  $J = 128$  Hz), 131.8 (d,  $J = 9.5$  Hz), 131.4 (d,  $J = 2.7$  Hz), 128.4 (d,  $J = 12.6$  Hz), 53.2 (d,  $J = 3.2$  Hz), 32.3 (d,  $J = 4.4$  Hz);  $^{31}\text{P}$  NMR (162 MHz,  $\text{CDCl}_3$ )  $\delta$  19.7.

### Diphenyl(pyrrolidin-1-yl)phosphine Oxide (5h)<sup>15</sup>.

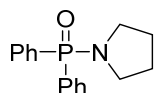

Yellow oil (53 mg, 99%): <sup>1</sup>H NMR (400 MHz, CDCl<sub>3</sub>) δ 7.91–7.75 (m, 4H), 7.49–7.32 (m, 6H), 3.15–2.99 (m, 4H), 1.90–1.72 (m, 4H); <sup>13</sup>C NMR (100 MHz, CDCl<sub>3</sub>) δ 132.7 (d, *J* = 130 Hz), 132.2 (d, *J* = 9.2 Hz), 131.6 (d, *J* = 2.7 Hz), 128.5 (d, *J* = 12.4 Hz), 46.9 (d, *J* = 2.1 Hz), 26.6 (d, *J* = 6.7 Hz); <sup>31</sup>P NMR (162 MHz, CDCl<sub>3</sub>) δ 25.4.

### Morpholinodiphenylphosphine Oxide (5i)<sup>15</sup>.

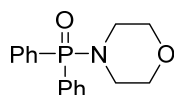

Yellow oil (42 mg, 74%): <sup>1</sup>H NMR (400 MHz, CDCl<sub>3</sub>) δ 7.93–7.81 (m, 4H), 7.54–7.42 (m, 6H), 3.77–3.63 (m, 4H), 3.17–2.99 (m, 4H); <sup>13</sup>C NMR (100 MHz, CDCl<sub>3</sub>) δ 132.4 (d, *J* = 9.1 Hz), 132.0 (d, *J* = 2.6 Hz), 130.8 (d, *J* = 129 Hz), 128.7 (d, *J* = 12.4 Hz), 67.2 (d, *J* = 6.6 Hz), 45.0; <sup>31</sup>P NMR (162 MHz, CDCl<sub>3</sub>) δ 29.2.

### Diethyl Benzylphosphoramidate (5j)<sup>16</sup>.

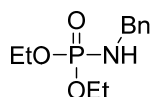

Yellow oil (24 mg, 50%): <sup>1</sup>H NMR (400 MHz, CDCl<sub>3</sub>) δ 7.60–7.54 (m, 4H), 7.53–7.48 (m, 1H), 4.45–4.15 (m, 6H), 3.04 (br, 1H), 1.54 (t, *J* = 7.0 Hz, 6H); <sup>13</sup>C NMR (100 MHz, CDCl<sub>3</sub>) δ 139.6 (d, *J* = 6.4 Hz), 128.5, 127.33, 127.28, 62.4 (d, *J* = 5.3 Hz), 45.3, 16.1 (d, *J* = 7.0 Hz); <sup>31</sup>P NMR (162 MHz, CDCl<sub>3</sub>) δ 8.5.

### Dibutyl Benzylphosphoramidate (5k).

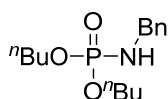

Yellow oil (18 mg, 30%):  $^1\text{H}$  NMR (400 MHz,  $\text{CDCl}_3$ )  $\delta$  7.33–7.16 (m, 5H), 4.03 (d,  $J = 9.7$  Hz, 2H), 4.00–3.83 (m, 4H), 2.80 (br, 1H), 1.57 (dt,  $J = 14.6, 6.7$  Hz, 4H), 1.39–1.27 (m, 4H), 0.86 (t,  $J = 7.4$  Hz, 6H);  $^{13}\text{C}$  NMR (100 MHz,  $\text{CDCl}_3$ )  $\delta$  139.6 (d,  $J = 6.3$  Hz), 128.5, 127.34, 127.28, 66.2 (d,  $J = 5.6$  Hz), 45.4, 32.4 (d,  $J = 7.1$  Hz), 18.8, 13.6;  $^{31}\text{P}$  NMR (162 MHz,  $\text{CDCl}_3$ )  $\delta$  8.6; HRMS (ESI-Orbitrap)  $m/z$ :  $[\text{M} + \text{Na}]^+$  calcd for  $\text{C}_{15}\text{H}_{26}\text{NO}_3\text{PNa}$  322.1543, found 322.1539.

### Diisopropyl Benzylphosphoramidate (5l)<sup>16</sup>.

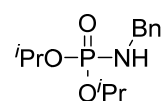

Yellow amorphous solid (19 mg, 35%):  $^1\text{H}$  NMR (400 MHz,  $\text{CDCl}_3$ )  $\delta$  7.33–7.19 (m, 5H), 4.69–4.49 (m, 2H), 4.05 (d,  $J = 9.1$  Hz, 2H), 2.72 (br, 1H), 1.30 (d,  $J = 6.0$  Hz, 6H), 1.25 (d,  $J = 6.4$  Hz, 6H);  $^{13}\text{C}$  NMR (100 MHz,  $\text{CDCl}_3$ )  $\delta$  139.7 (d,  $J = 7.2$  Hz), 128.5, 127.3(2C), 70.9 (d,  $J = 5.6$  Hz), 45.4, 23.8 (d,  $J = 3.4$  Hz), 23.7 (d,  $J = 4.0$  Hz);  $^{31}\text{P}$  NMR (162 MHz,  $\text{CDCl}_3$ )  $\delta$  6.6.

### Diisobutyl Benzylphosphoramidate (5m).

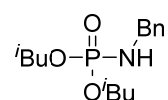

Yellow amorphous solid (45 mg, 75%):  $^1\text{H}$  NMR (400 MHz,  $\text{CDCl}_3$ )  $\delta$  7.36–7.18 (m, 5H), 4.08 (d,  $J = 9.9$  Hz, 2H), 3.83–3.63 (m, 4H), 2.97 (br, 1H), 1.97–1.84 (m, 2H), 0.92 (d,  $J = 3.2$  Hz, 6H), 0.90 (d,  $J = 2.8$  Hz, 6H);  $^{13}\text{C}$  NMR (100 MHz,  $\text{CDCl}_3$ )  $\delta$  139.6 (d,  $J = 6.2$  Hz), 128.5, 127.3, 127.2, 72.3 (d,  $J = 5.9$  Hz), 45.3, 29.1 (d,  $J = 7.4$  Hz), 18.7;  $^{31}\text{P}$  NMR (162 MHz,  $\text{CDCl}_3$ )  $\delta$  8.4; HRMS (ESI-Orbitrap)  $m/z$ :  $[\text{M} + \text{Na}]^+$  calcd for  $\text{C}_{15}\text{H}_{26}\text{NO}_3\text{PNa}$  322.1543, found 322.1539.

### References:

- (a) H. R. Hays, *J. Org. Chem.*, 1968, **33**, 3690; (b) M. J. P. Harger and S. Westlake, *Tetrahedron*, 1982, **38**, 1511.
- L. Deng, Y. Wang, H. Mei, Y. Pan and J. Han, *J. Org. Chem.*, 2019, **84**, 949.

3. C. Li, T. Chen and L.-B. Han, *Dalton Trans.*, 2016, **45**, 14893.
4. Q.-Y. Li, T. R. Swaroop, C. Hou, Z.-Q. Wang, Y.-M. Pan and H.-T. Tang, *Adv. Synth. Catal.*, 2019, **361**, 1761.
5. S. Li, T. Chen, Y. Saga and L.-B. Han, *RSC Adv.*, 2015, **5**, 71544.
6. B. Xiong, K. Zeng, S. Zhang, Y. Zhou, C.-T. Au and S.-F. Yin, *Tetrahedron*, 2015, **71**, 9293.
7. Y. Li, Q. Yang, L. Yang, N. Lei and K. Zheng, *Chem. Commun.*, 2019, **55**, 4981.
8. Q. Chen, J. Zeng, X. Yan, Y. Huang, C. Wen, X. Liu and K. Zhang, *J. Org. Chem.*, 2016, **81**, 10043.
9. A. Martínez-Asencio, D. J. Ramón and M. Yus, *Tetrahedron*, 2011, **67**, 3140.
10. S. Wagner, M. Rakotomalala, Y. Bykov, O. Walter and M. Döring, *Heteroatom Chem.*, 2012, **23**, 216.
11. T. C. Jenkins, Z.-Y. Qin and K. M. Engle, *Tetrahedron*, 2019, **75**, 3272.
12. I. Fernández, P. Oña-Burgos, G. Ruiz-Gómez, C. Bled, S. García-Granda and F. López-Ortiz, *Synlett*, 2007, 611.
13. J. Xiao, Q. Su, W. Dong, Z. Peng, Y. Zhang and D. An, *J. Org. Chem.*, 2017, **82**, 9497.
14. V. Moodley, L. Mthethwa, M. N. Pillay, B. Omondi and W. E. van Zyl, *Polyhedron*, 2015, **99**, 87.
15. Y. Wang, P. Qian, J.-H. Su, Y. Li, M. Bi, Z. Zha and Z. Wang, *Green Chem.*, 2017, **19**, 4769.
16. J. Fraser, L. J. Wilson, R. K. Blundell and C. J. Hayes, *Chem. Commun.*, 2013, **49**, 8919.

## 6. NMR Spectra for Products

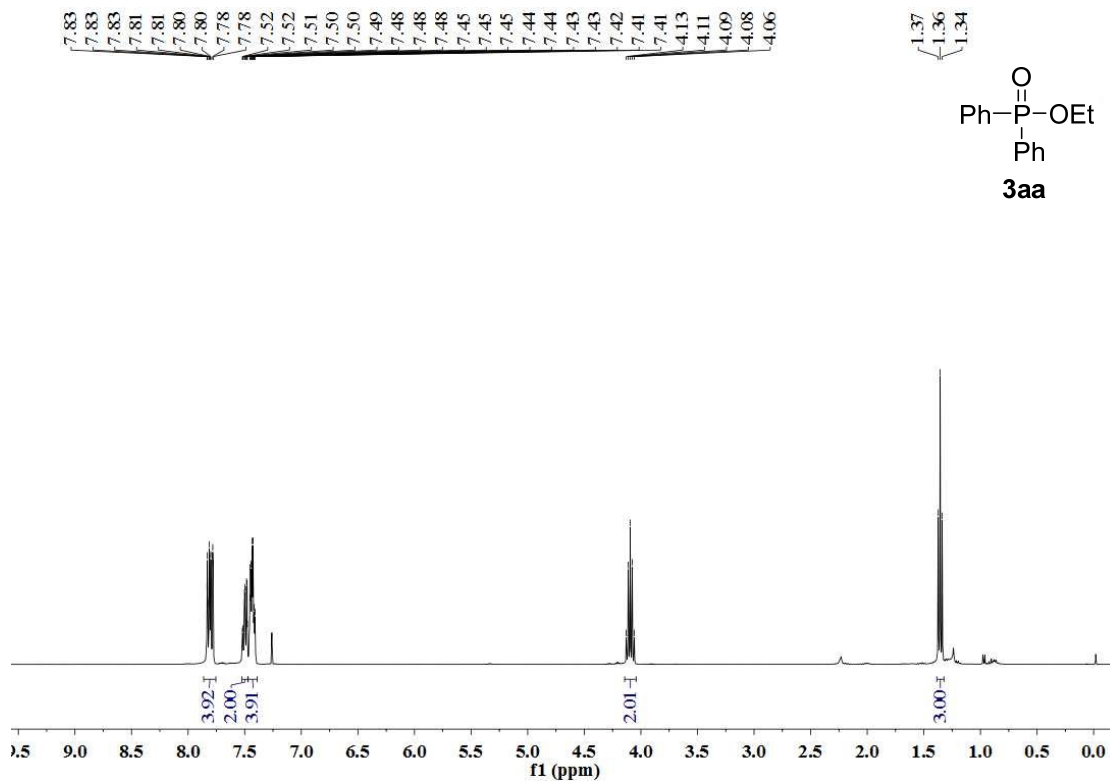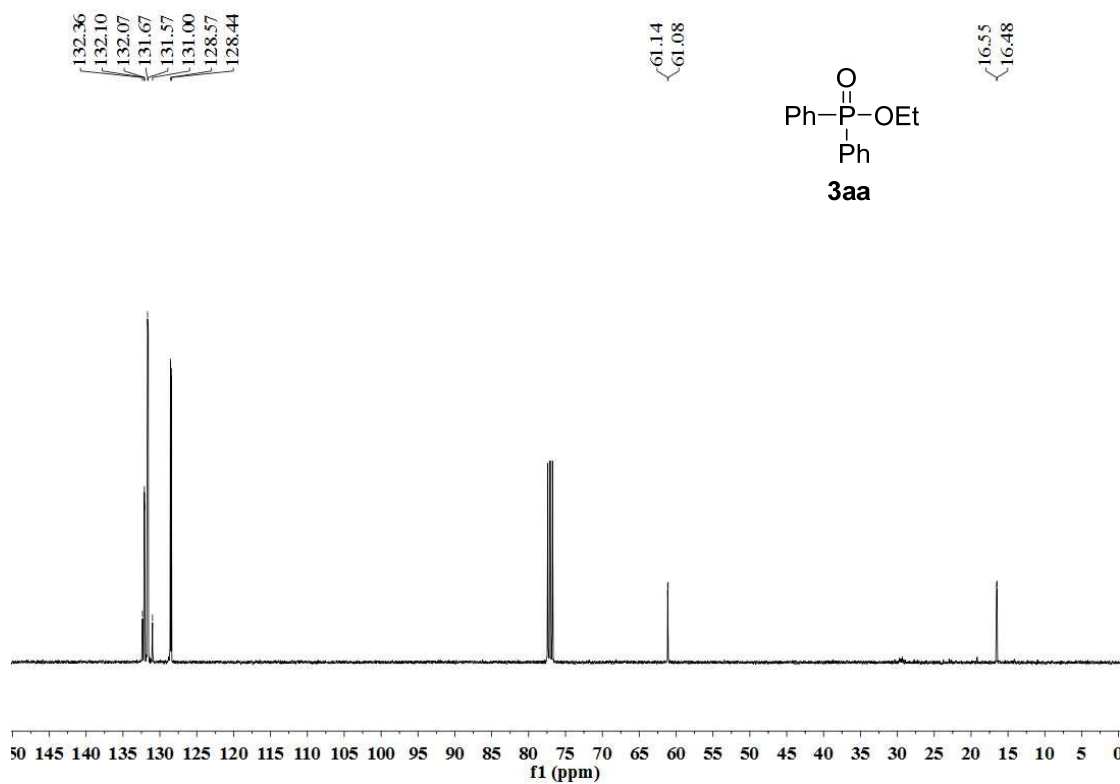

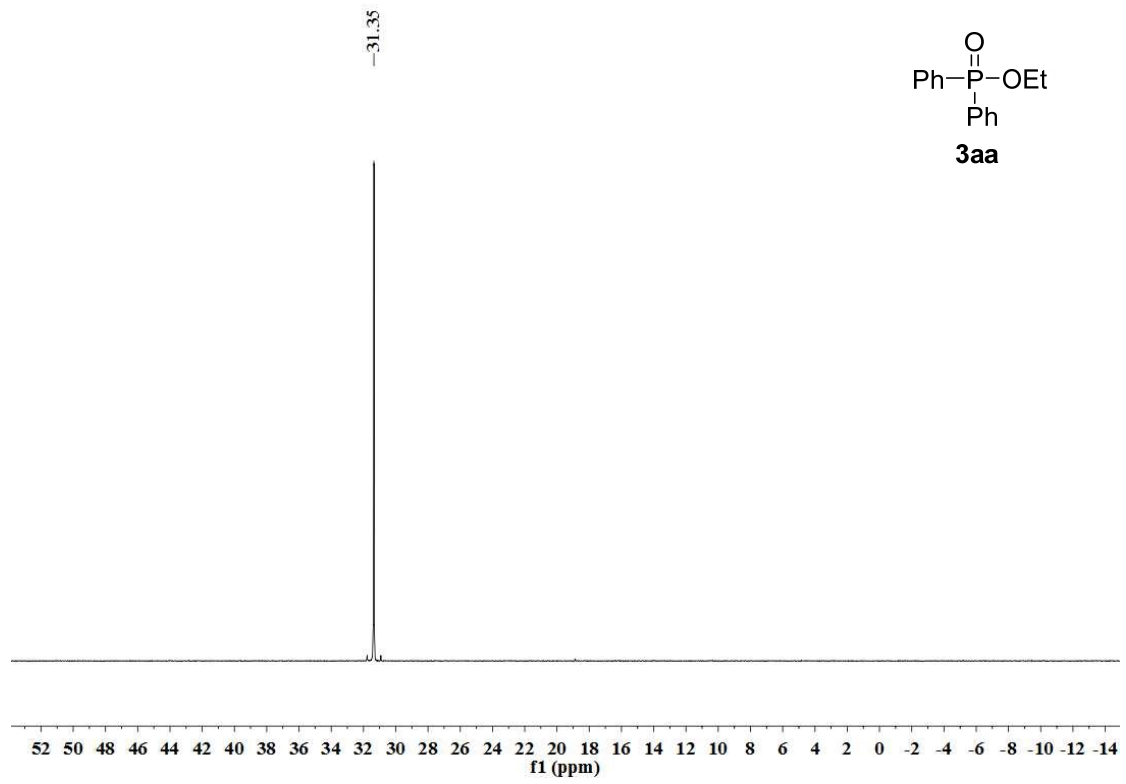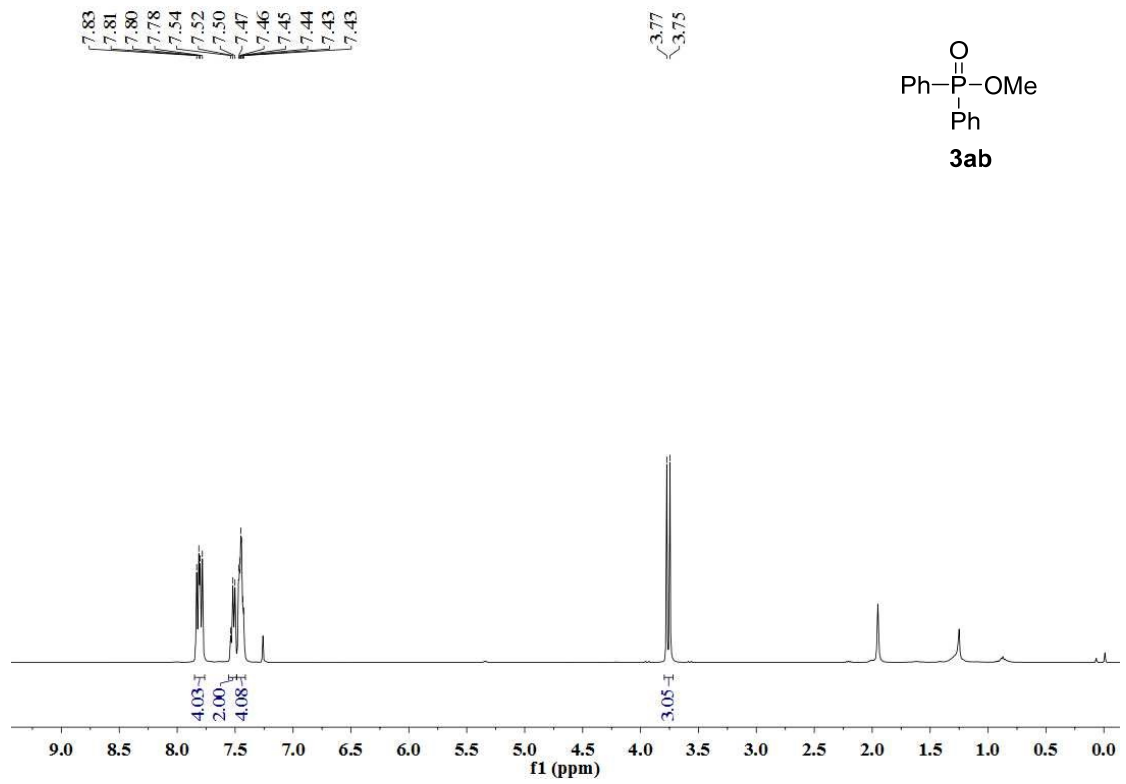

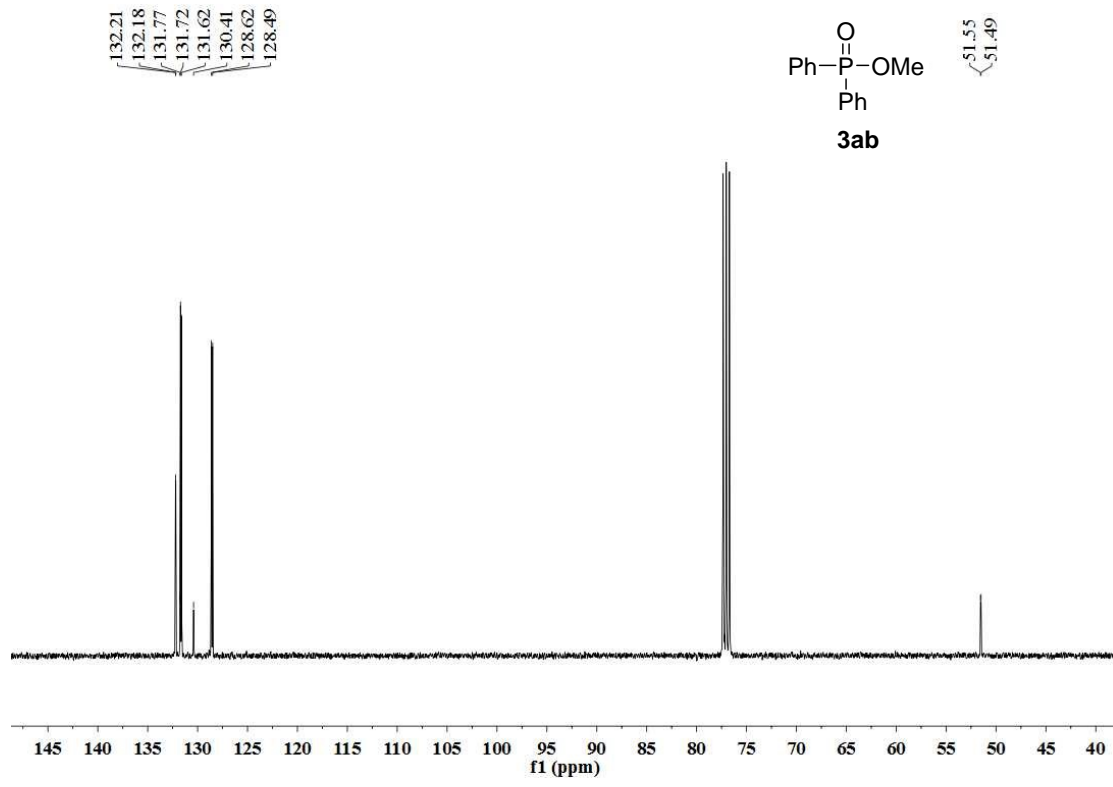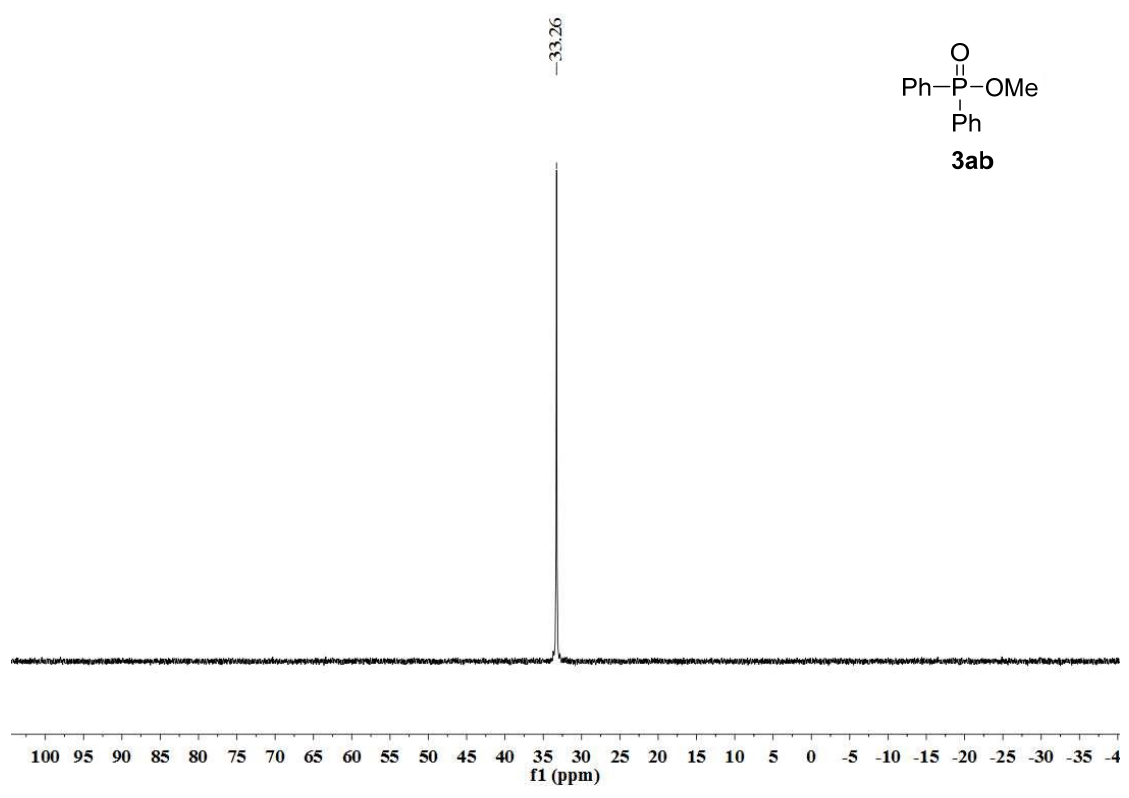

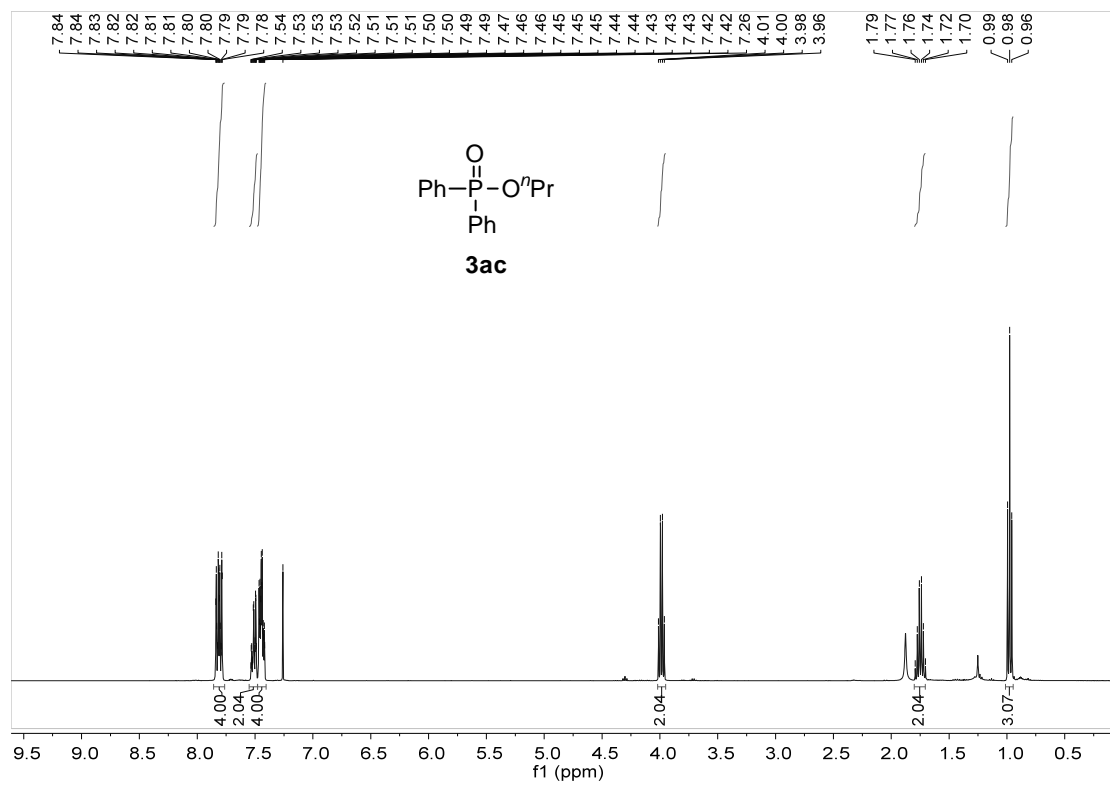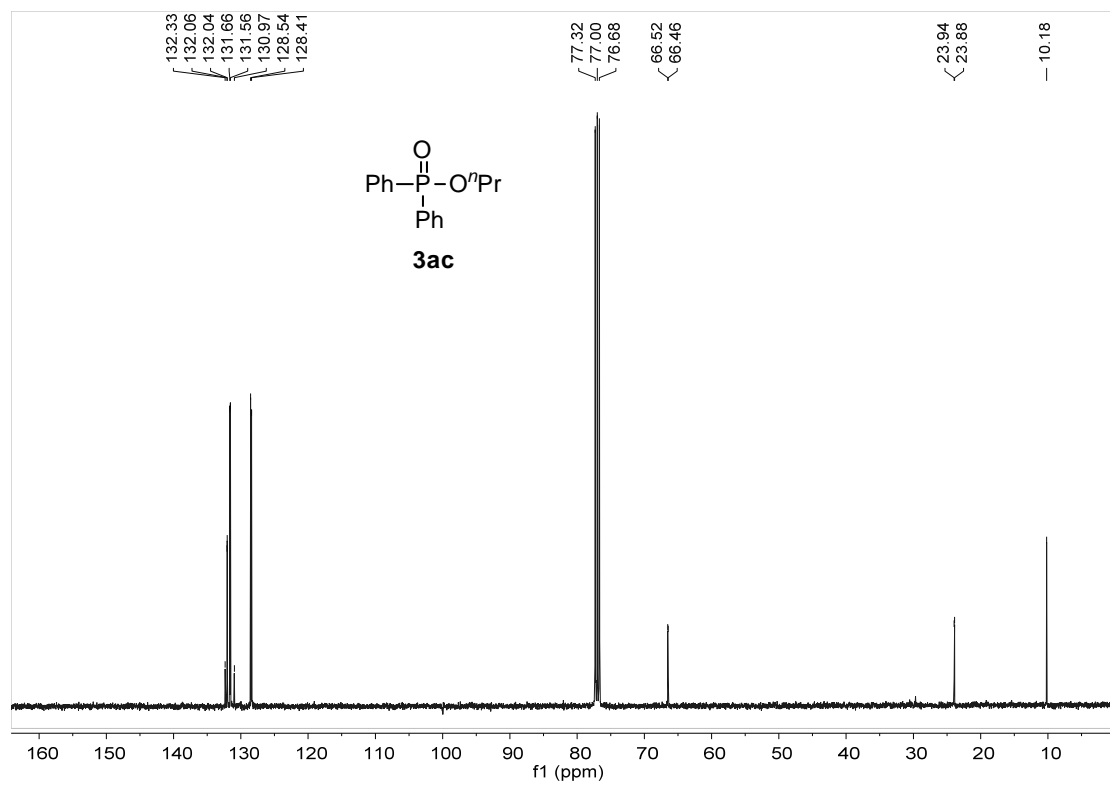



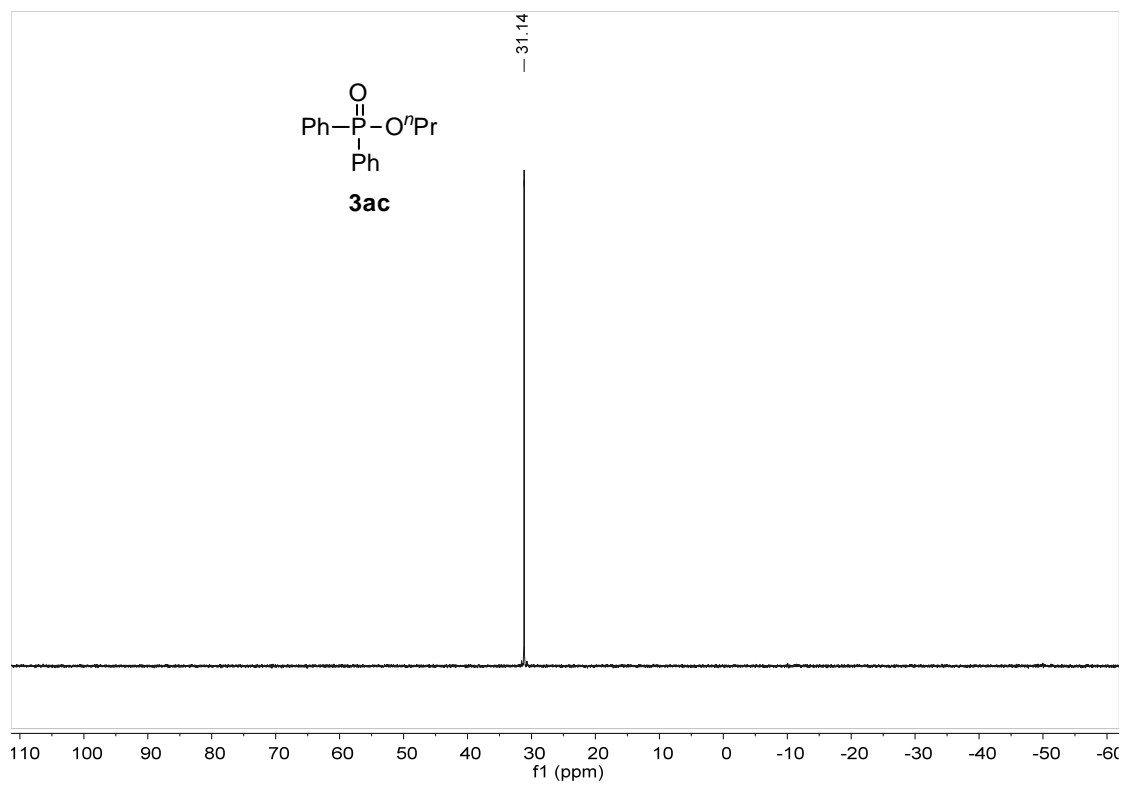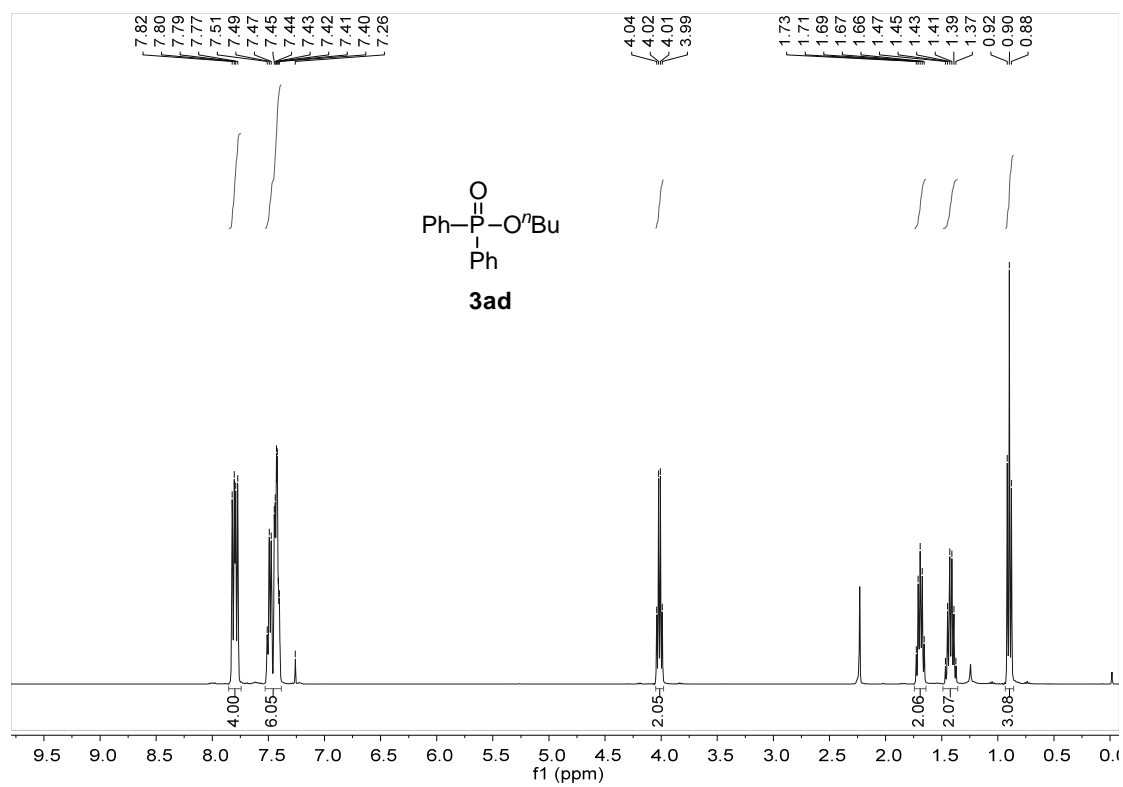

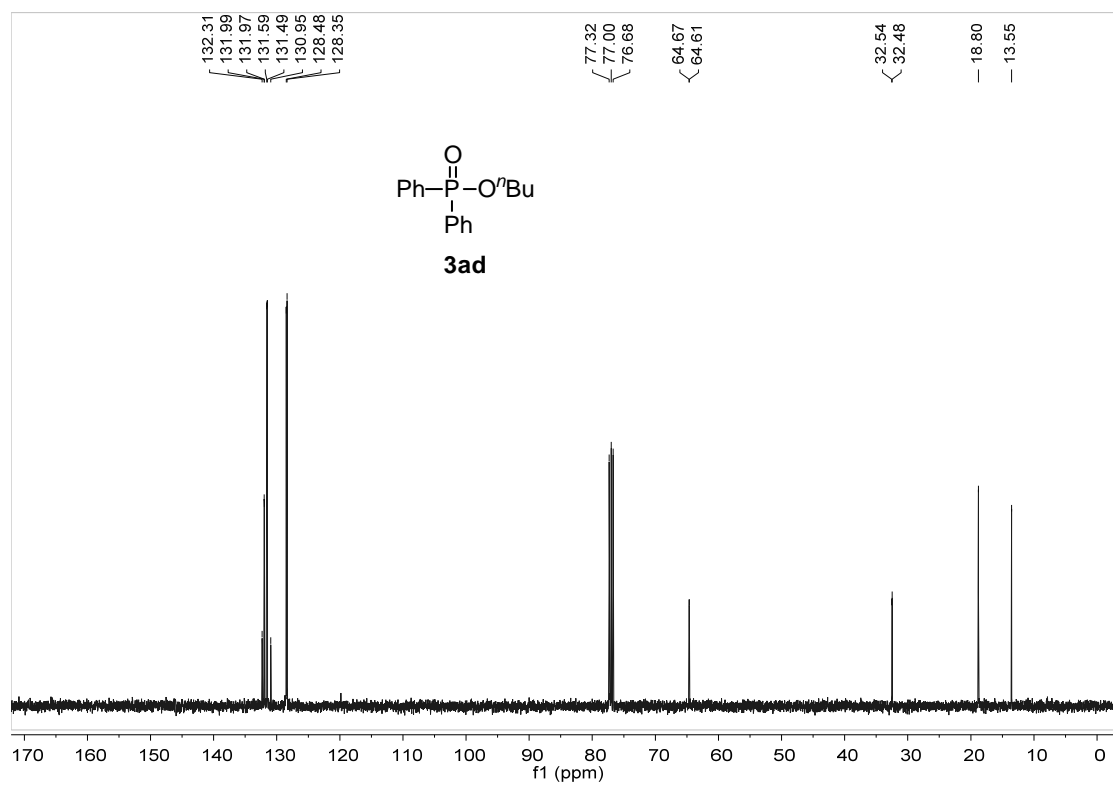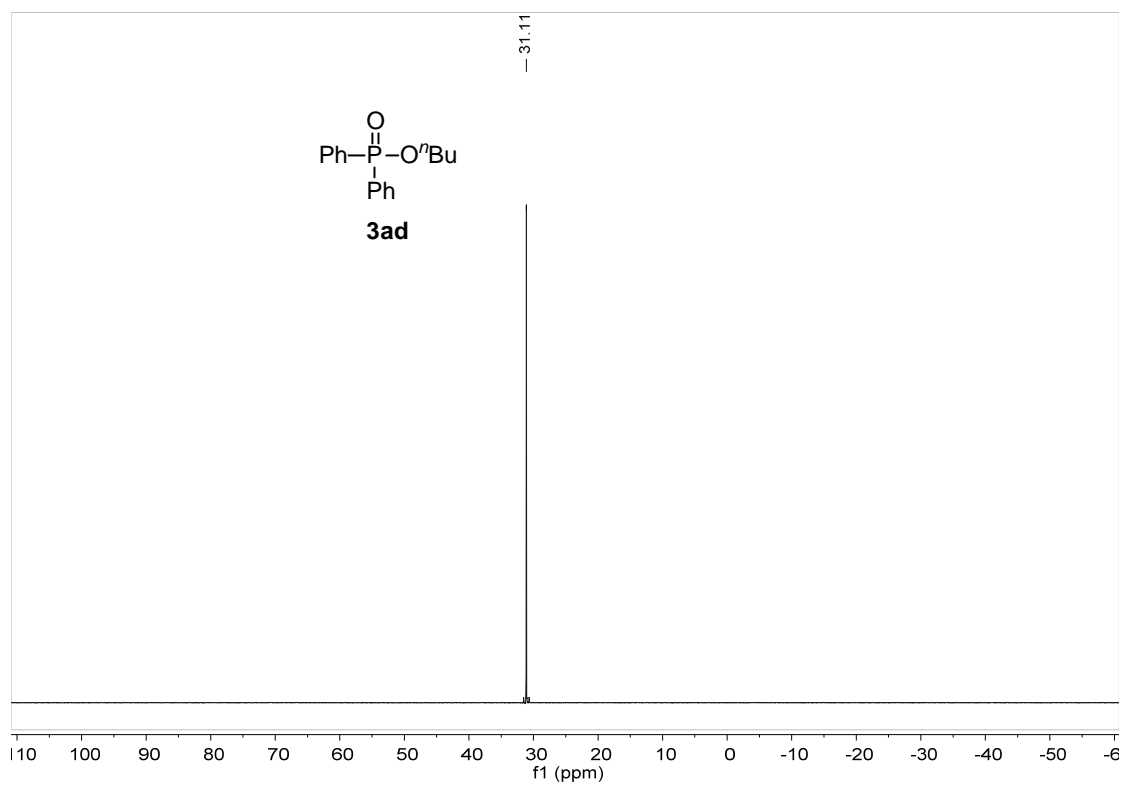

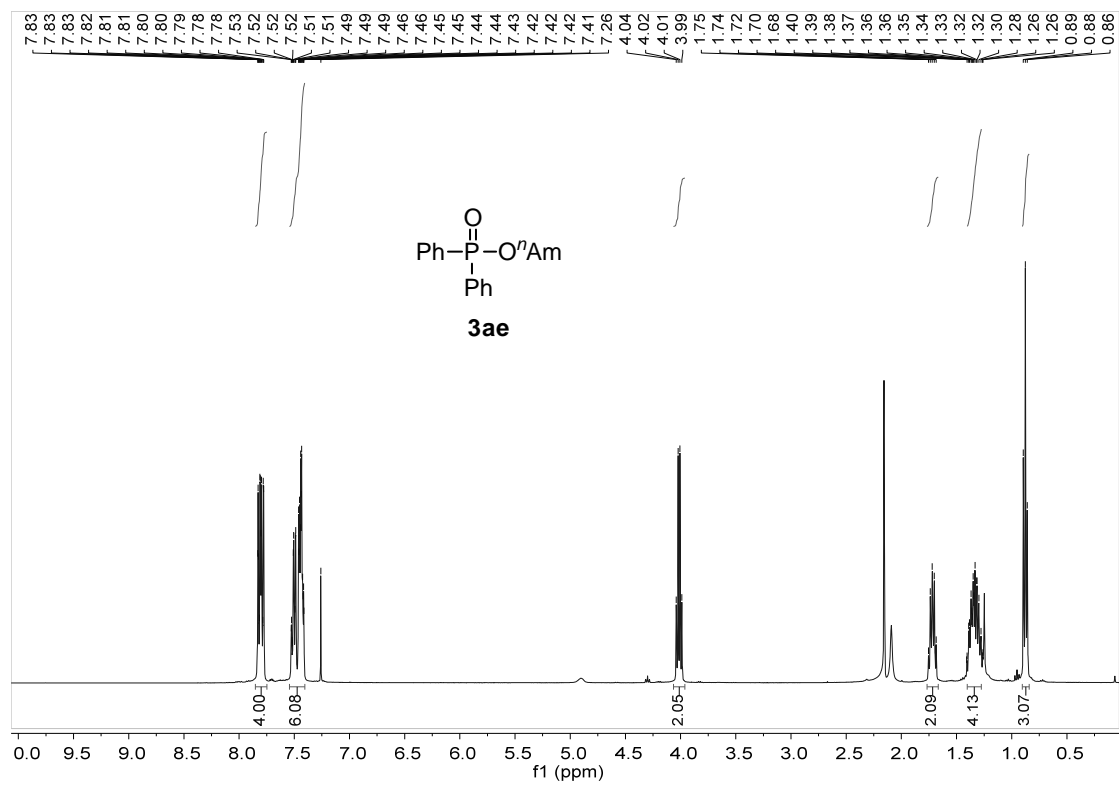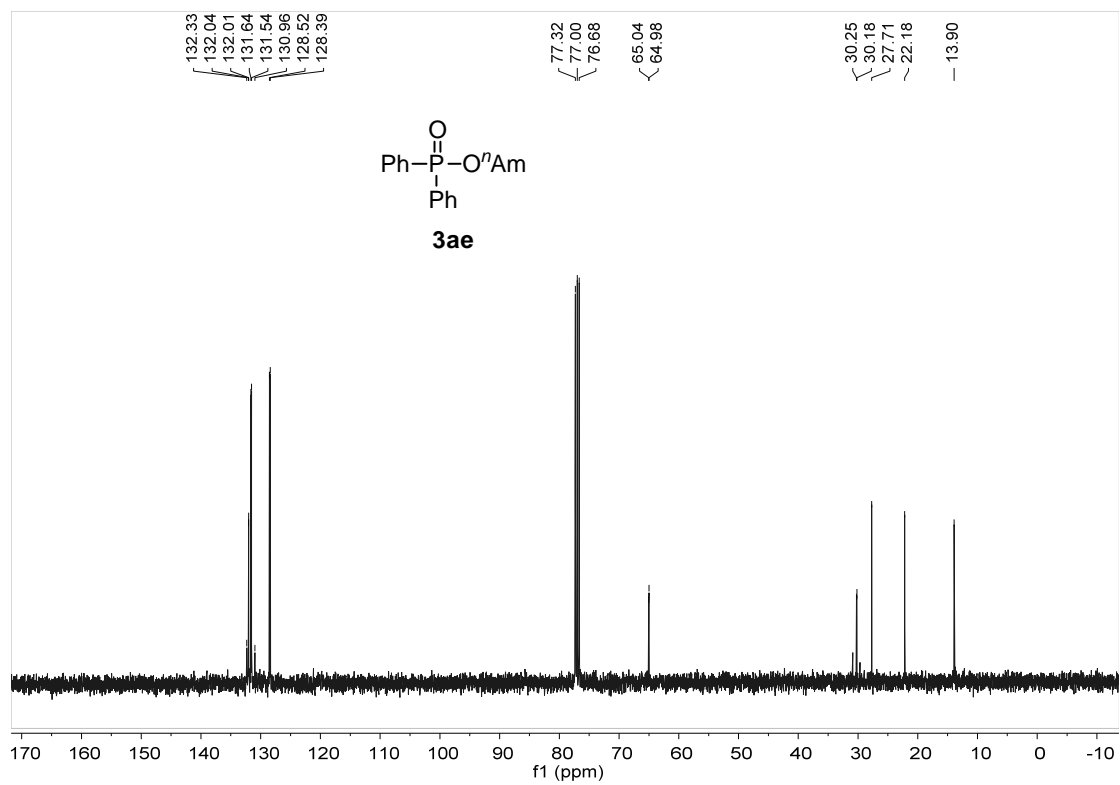

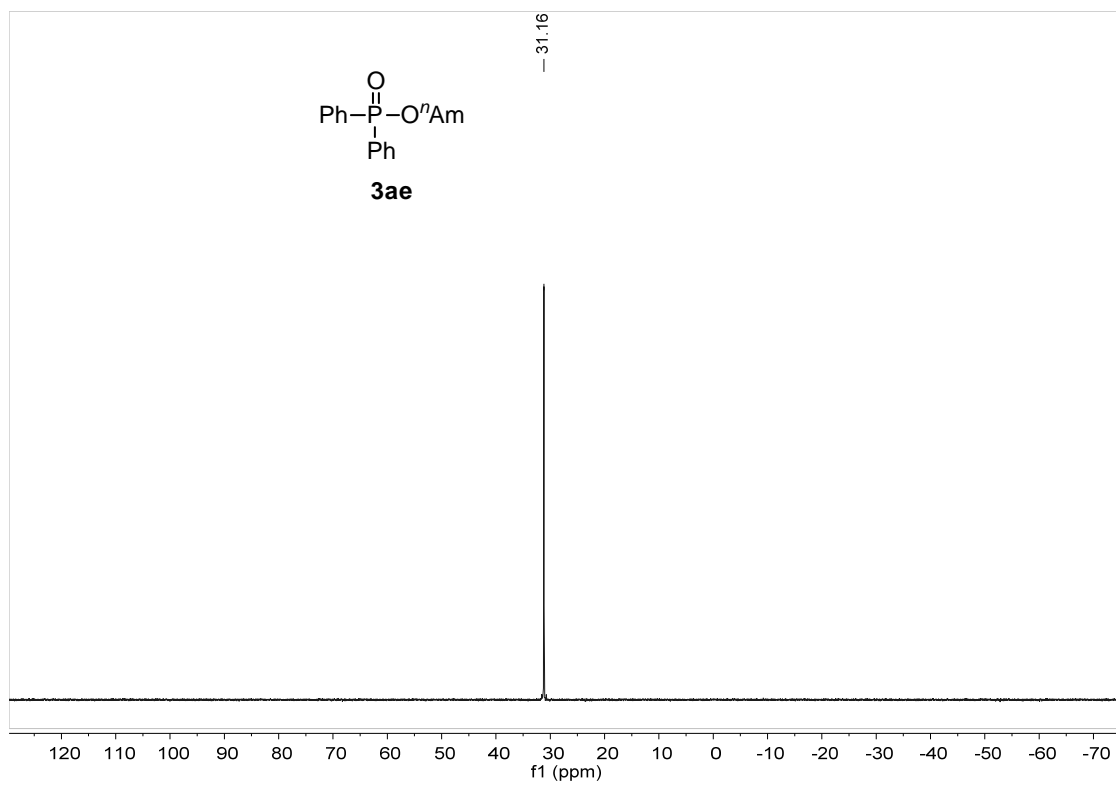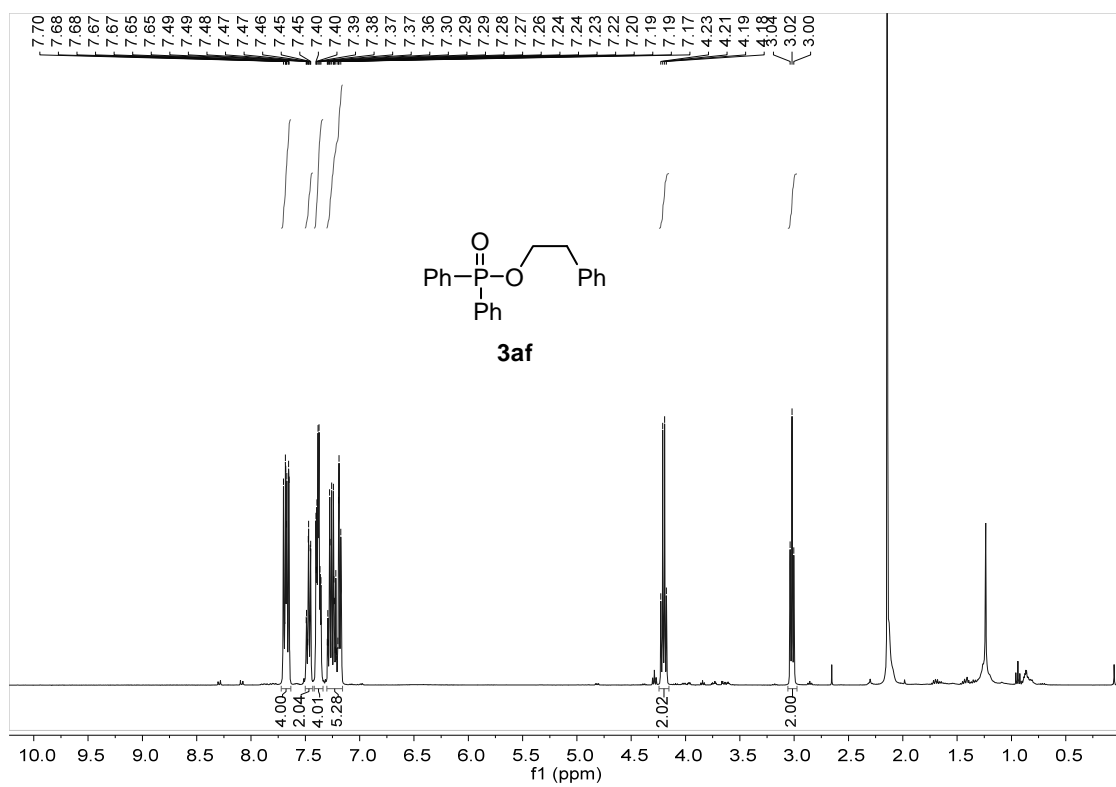

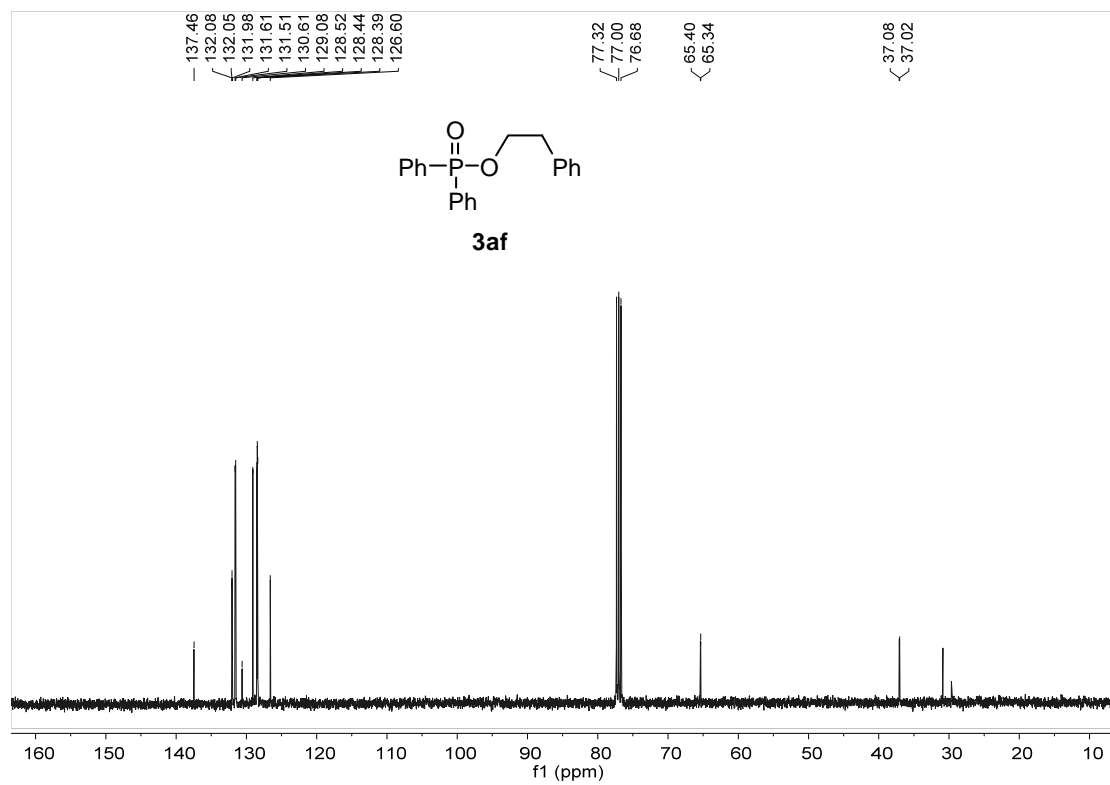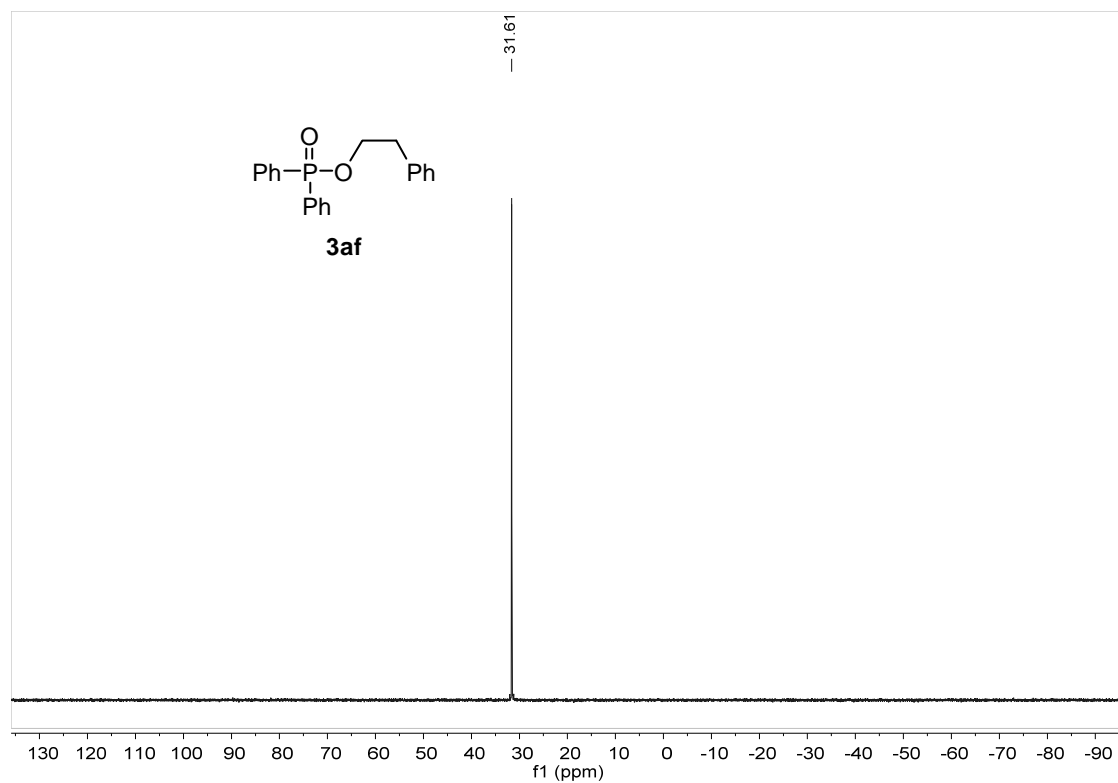

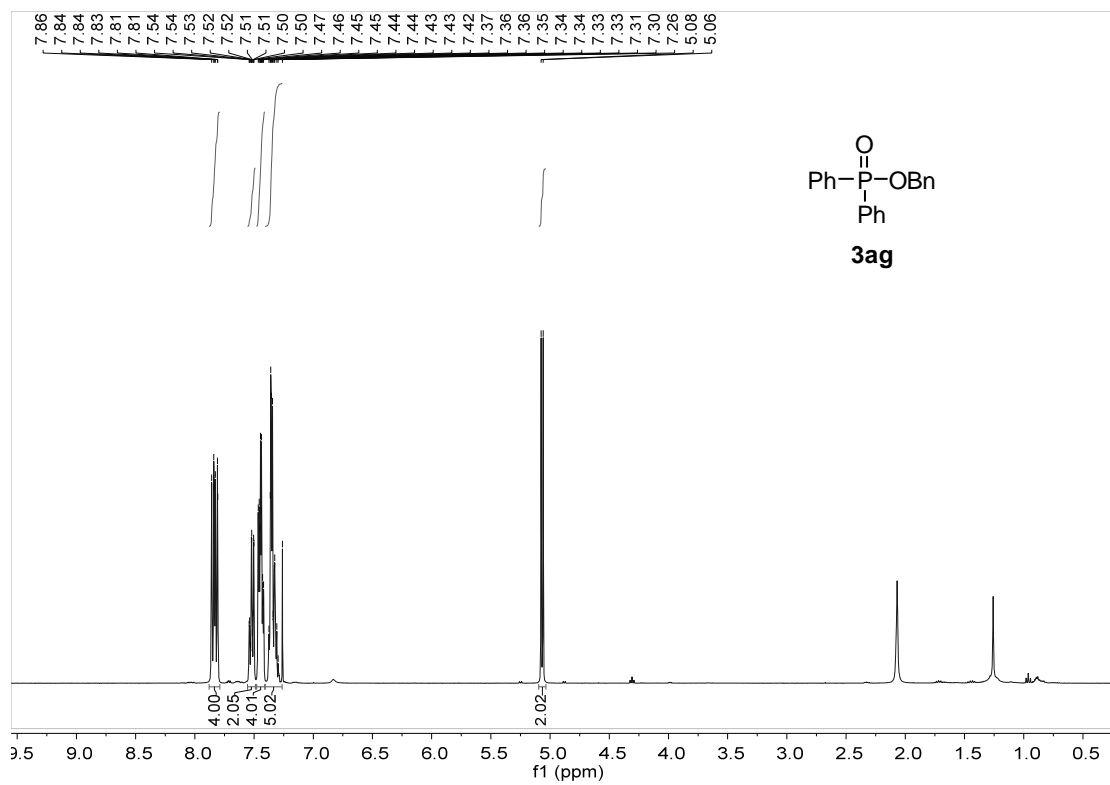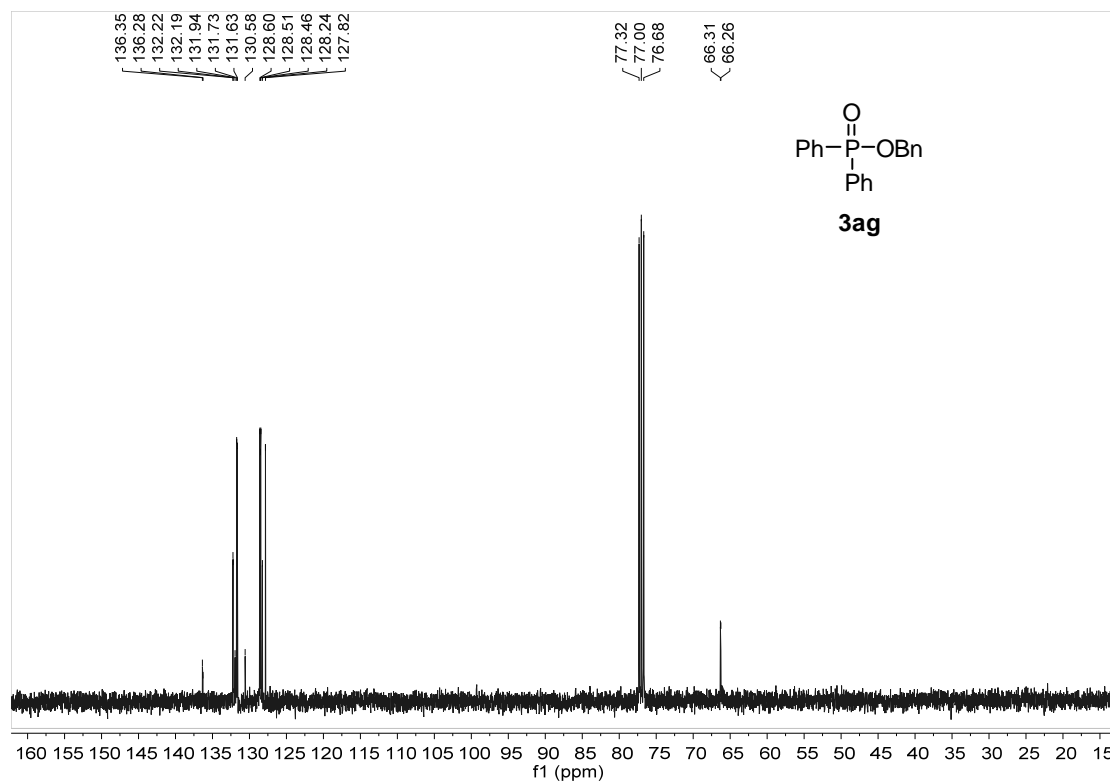

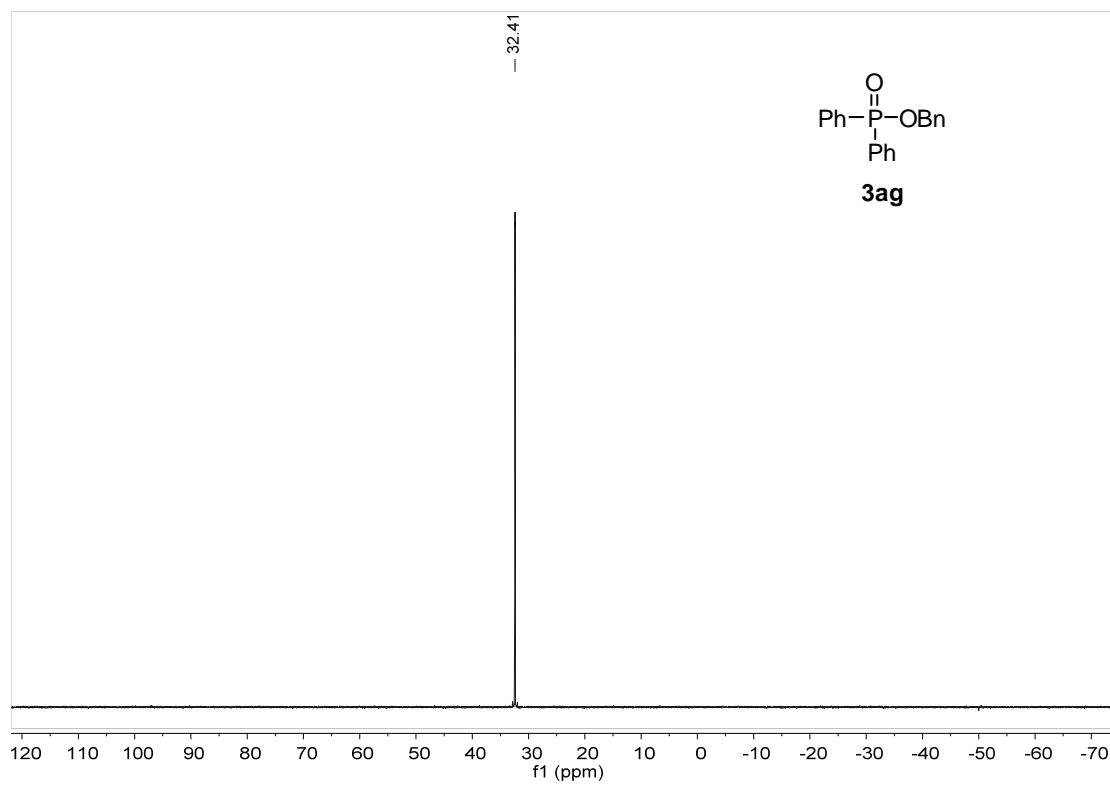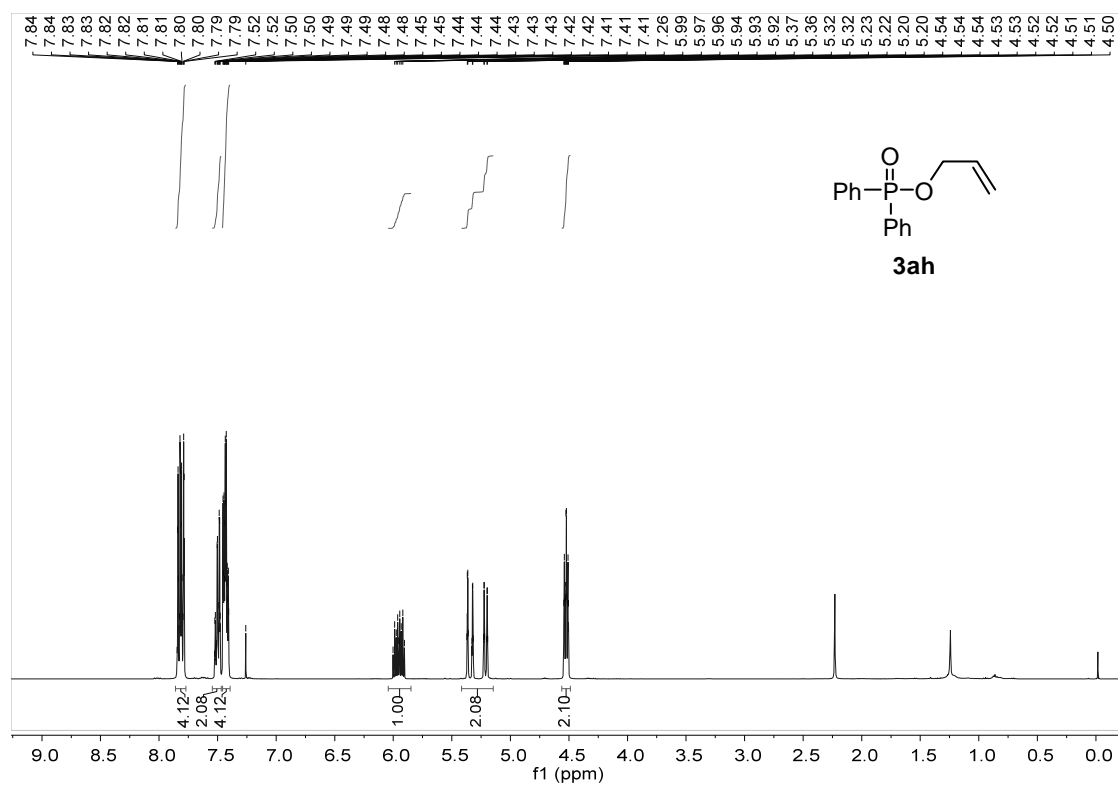

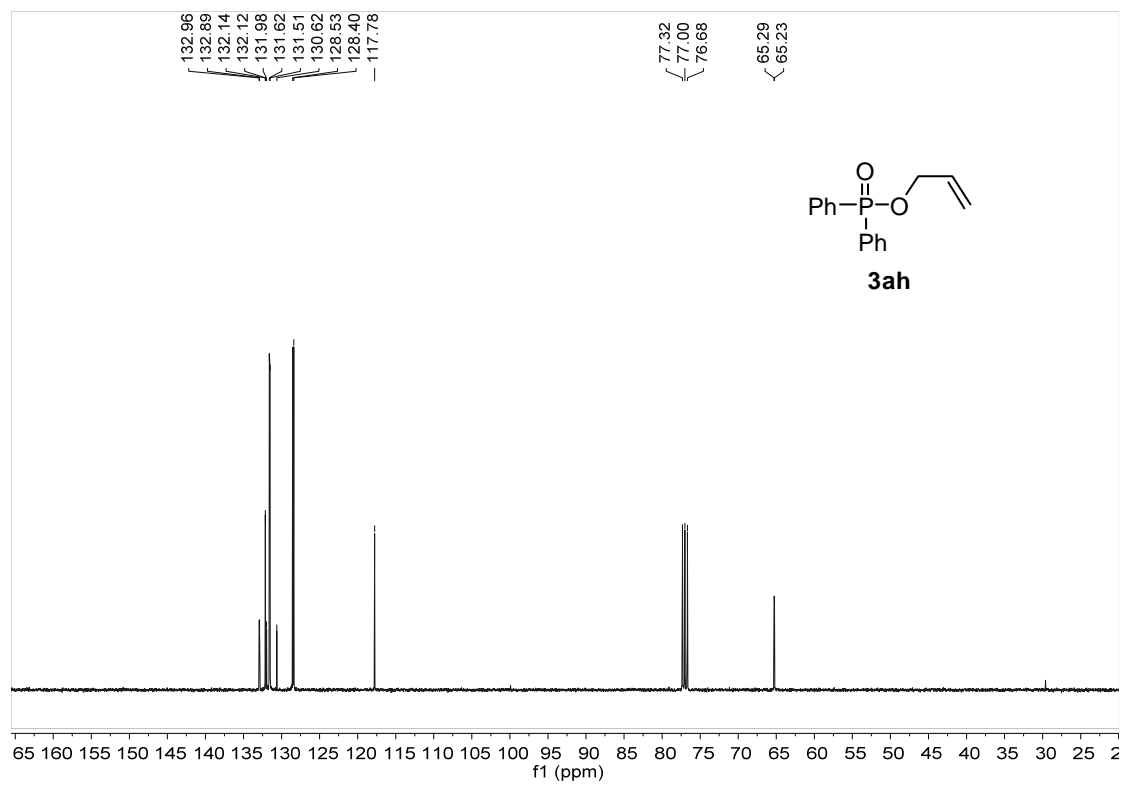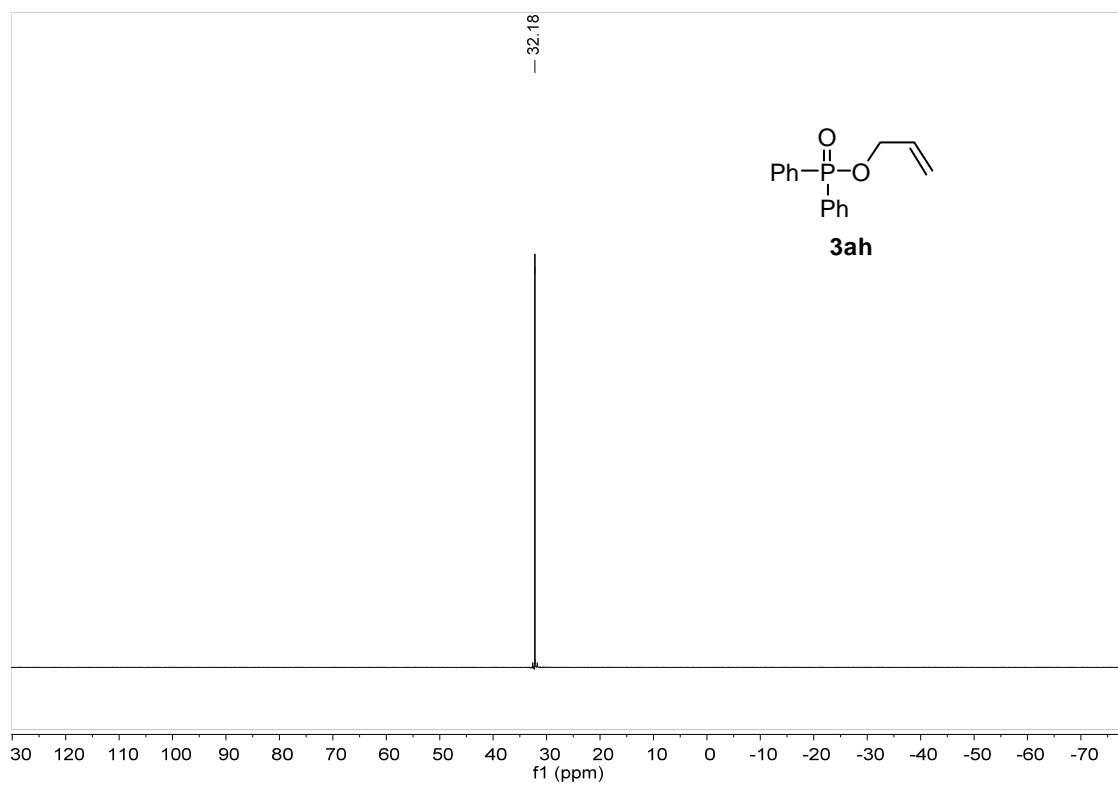



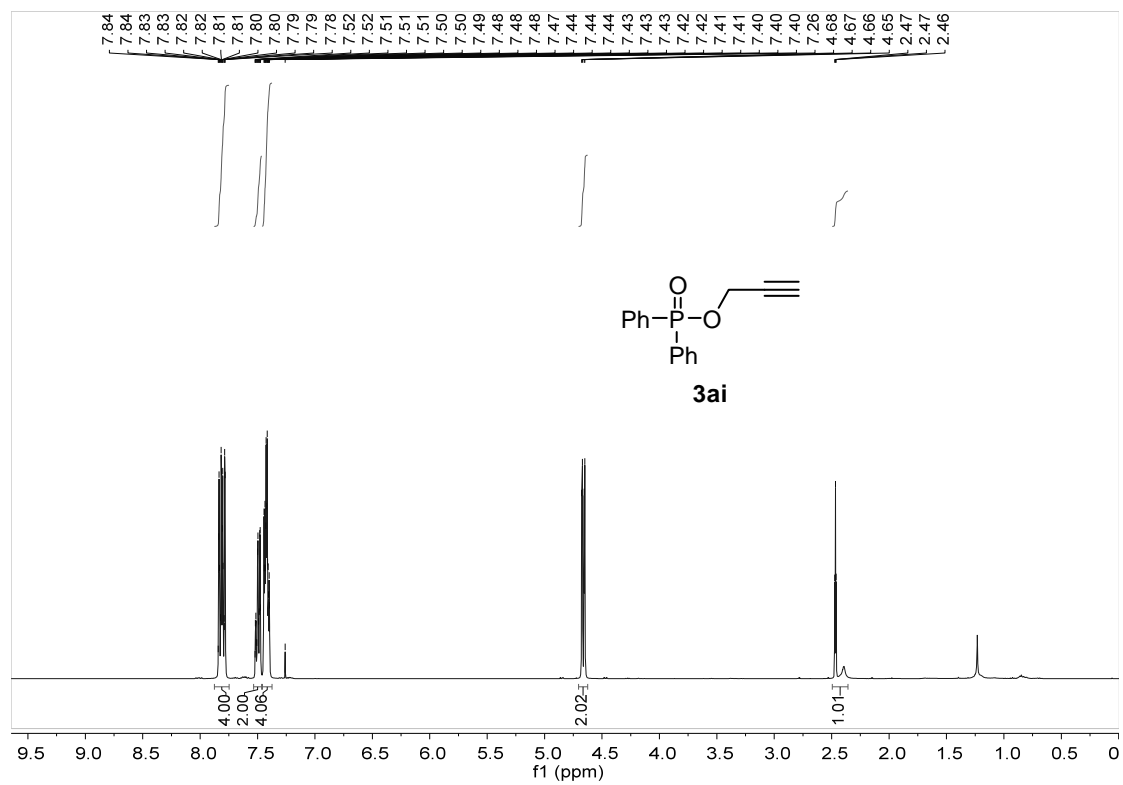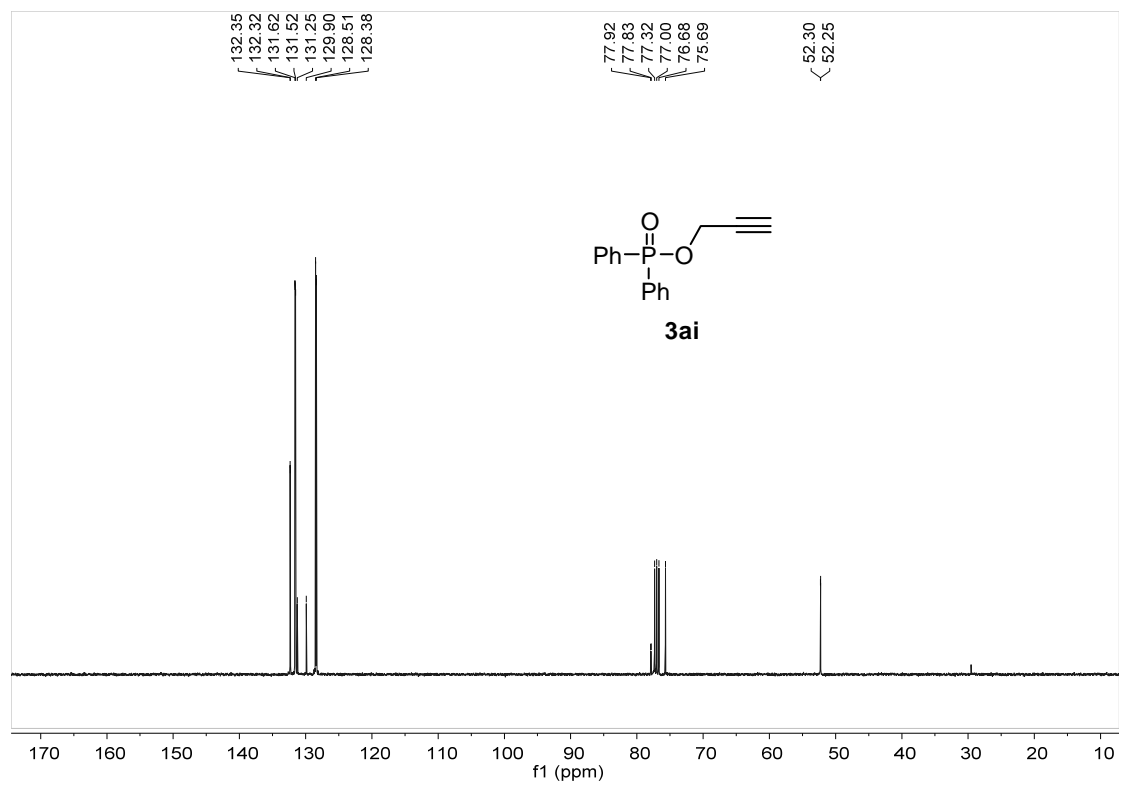

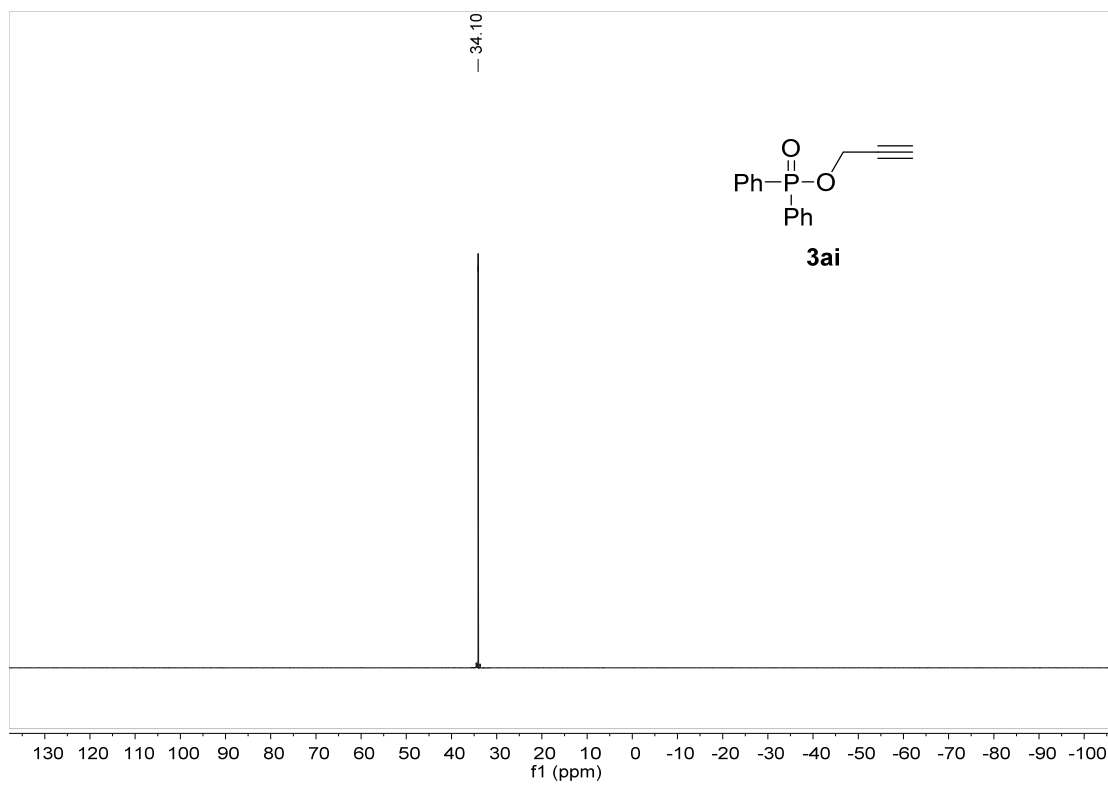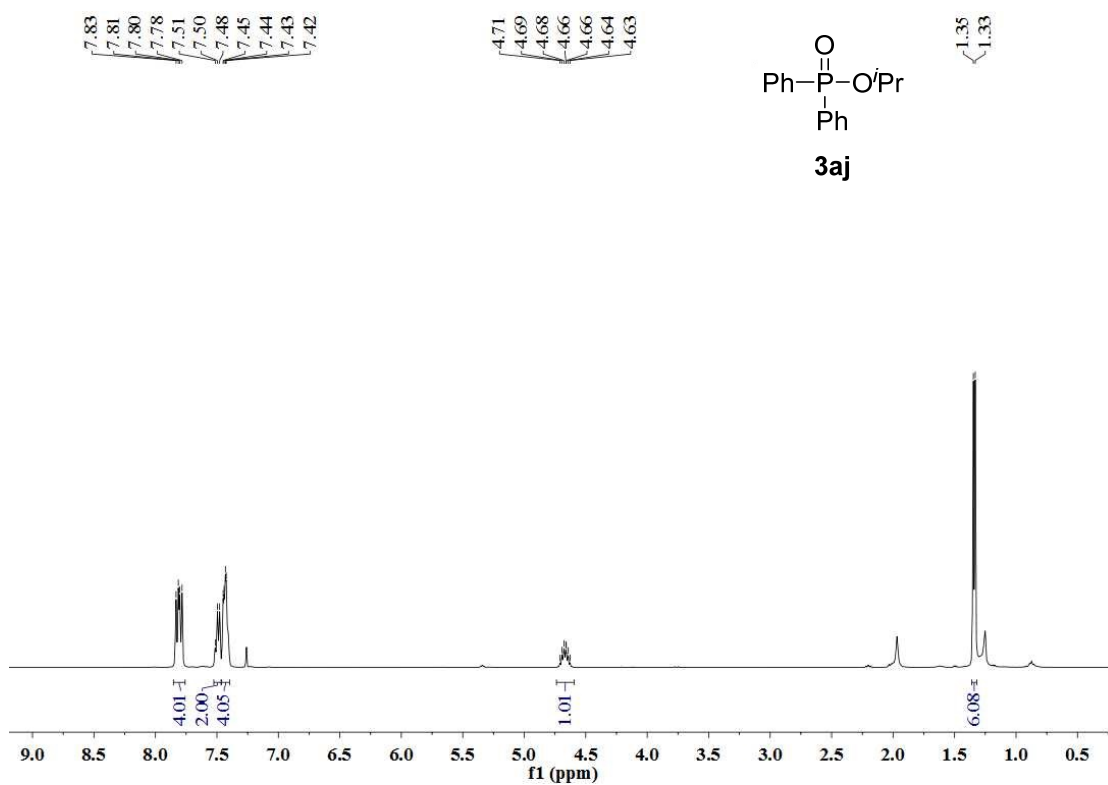

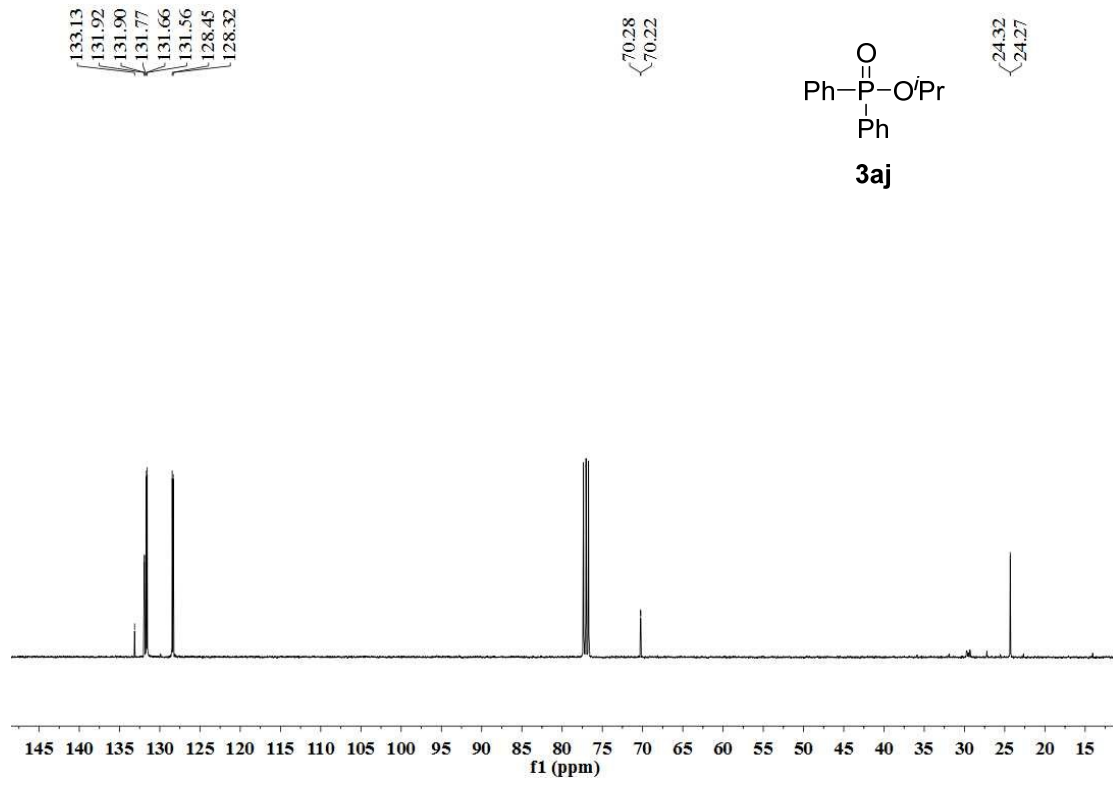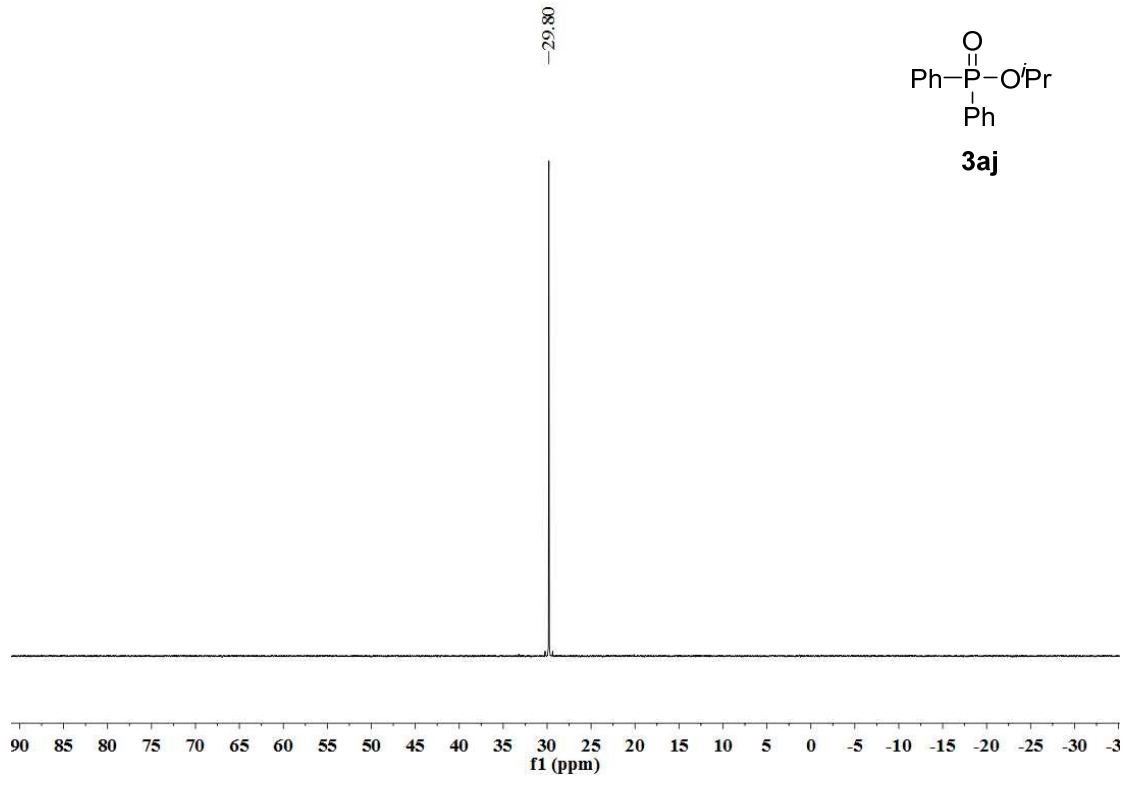

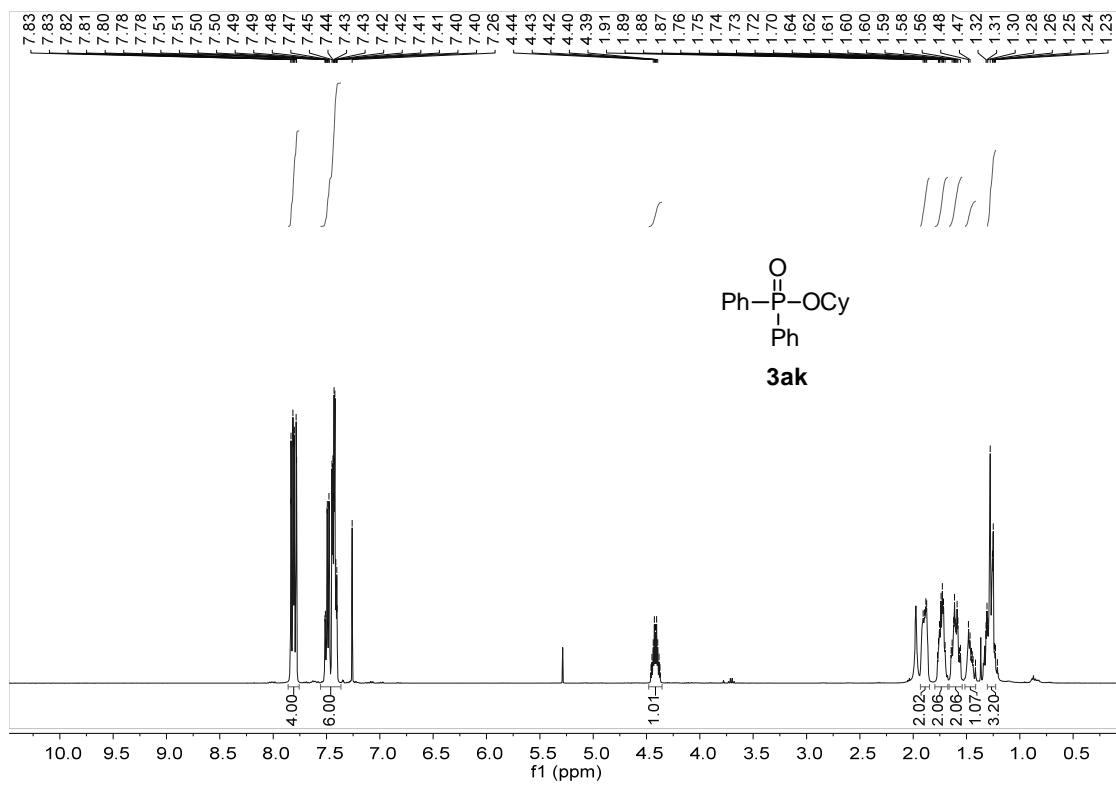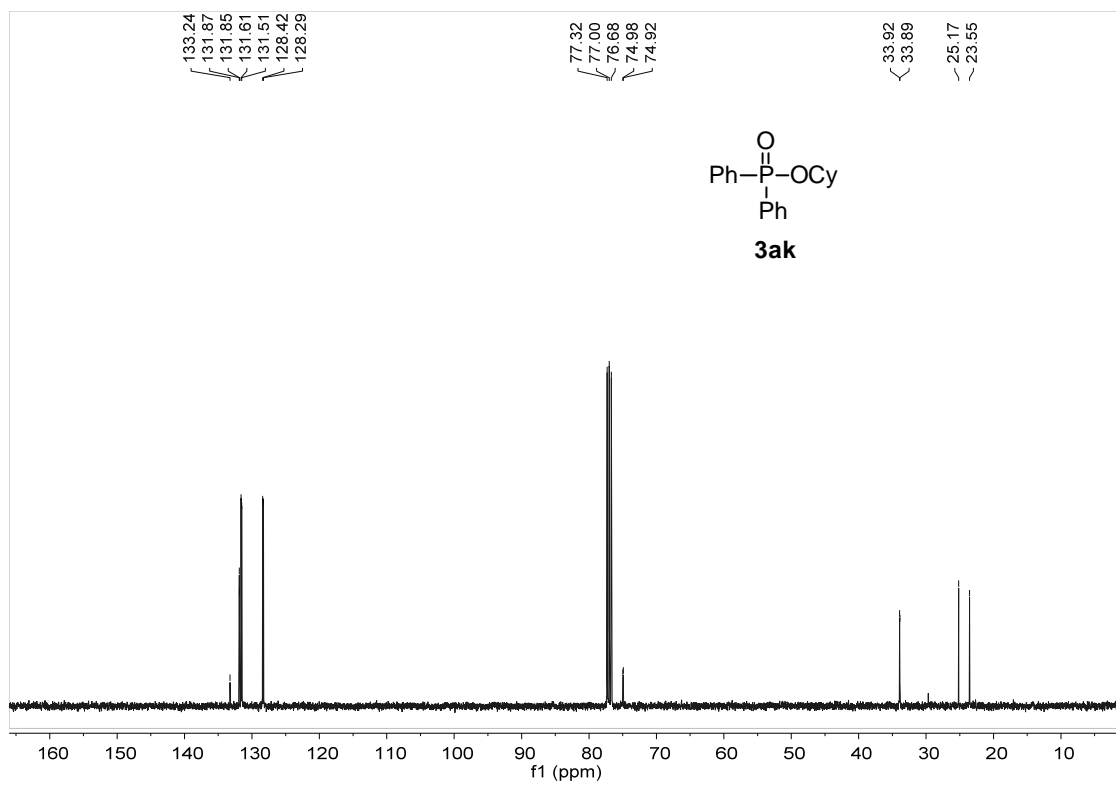

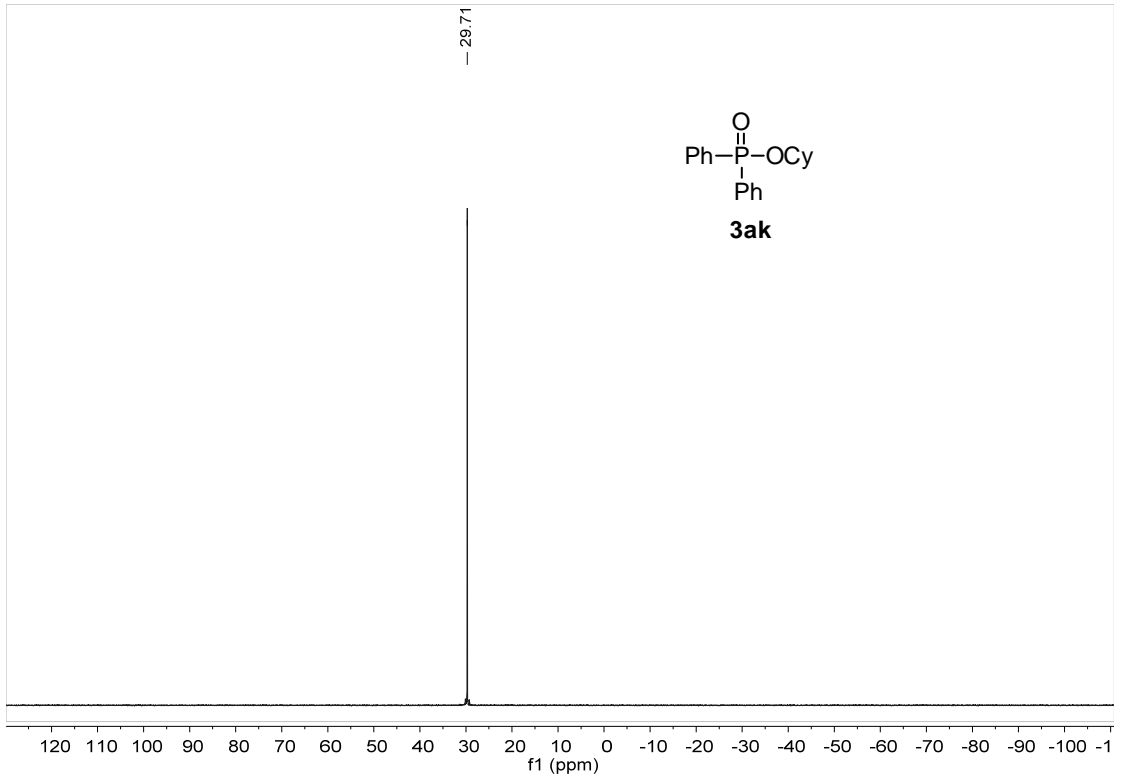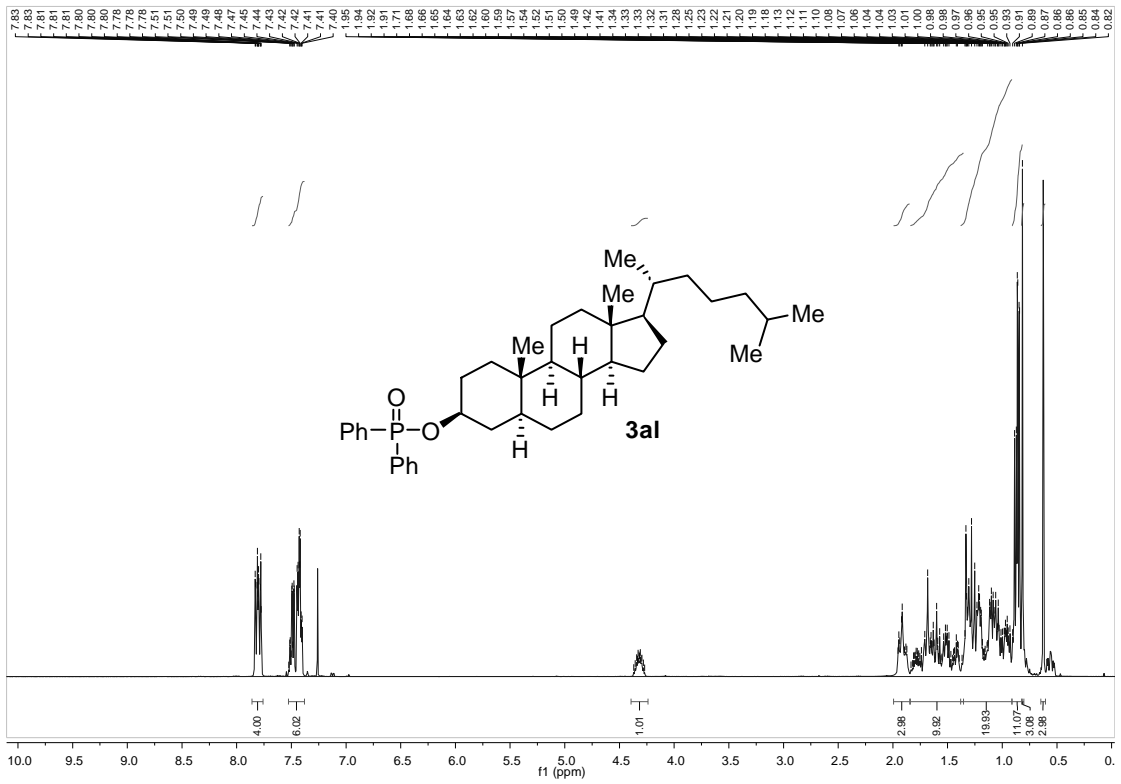

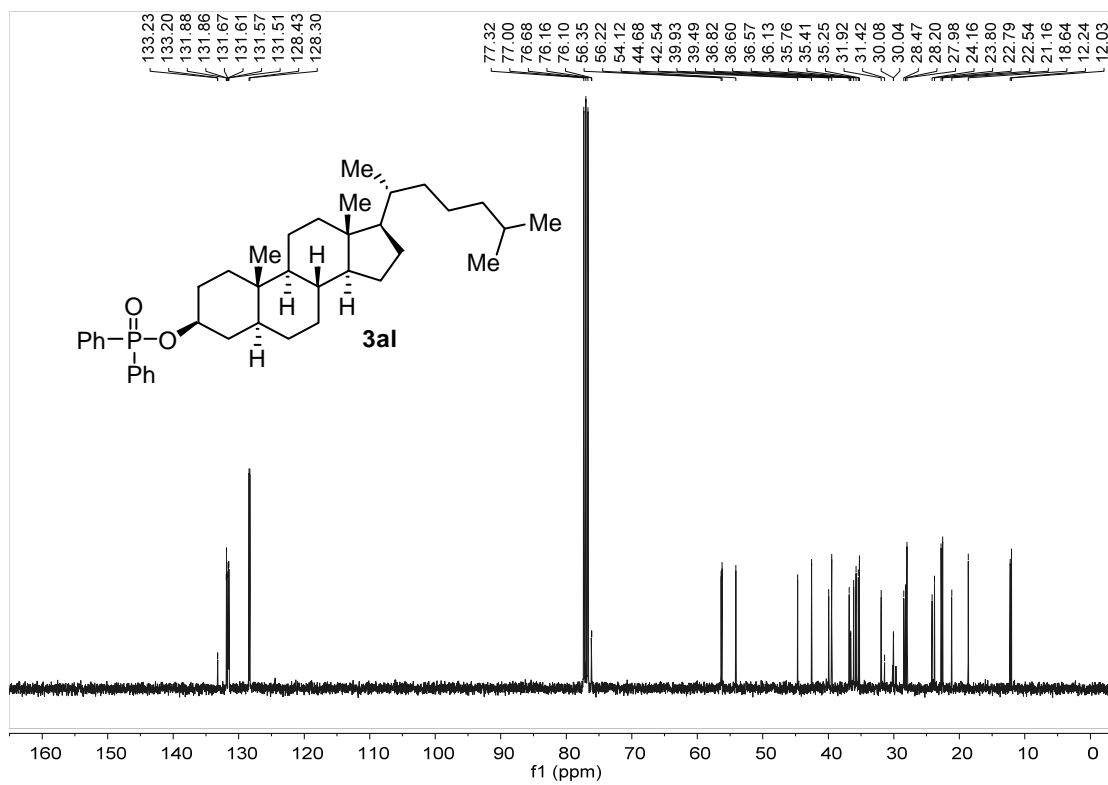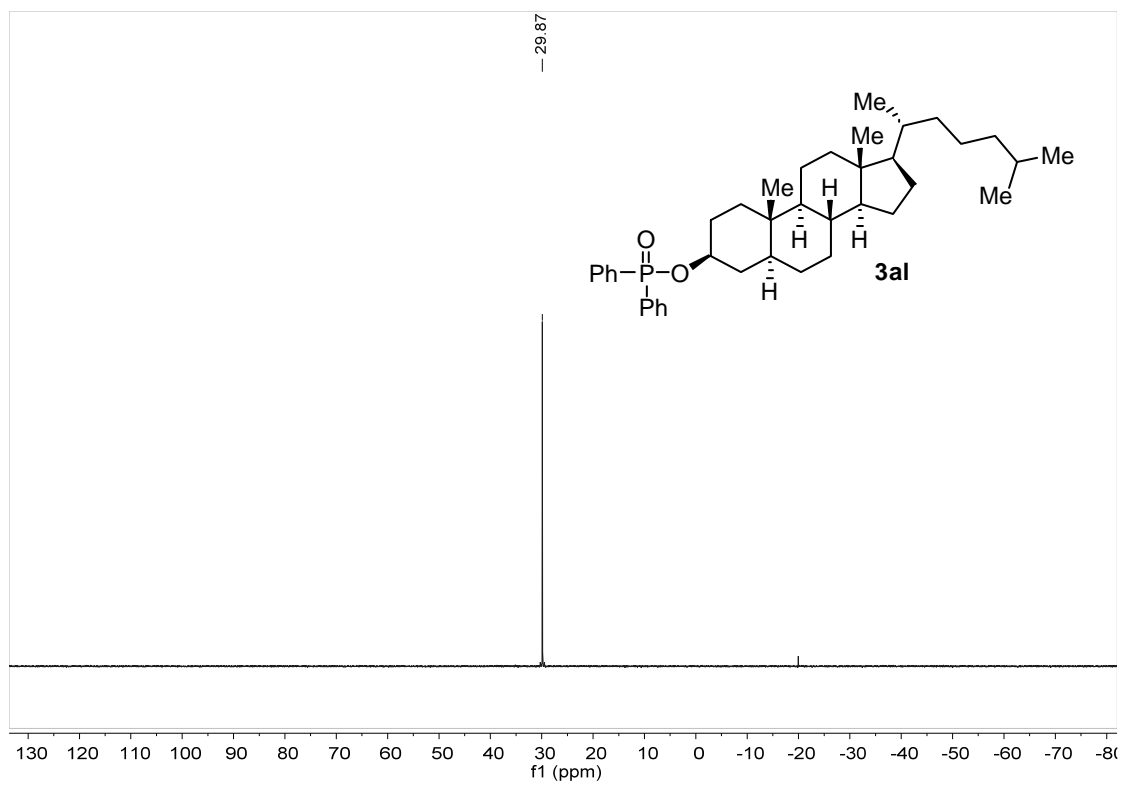

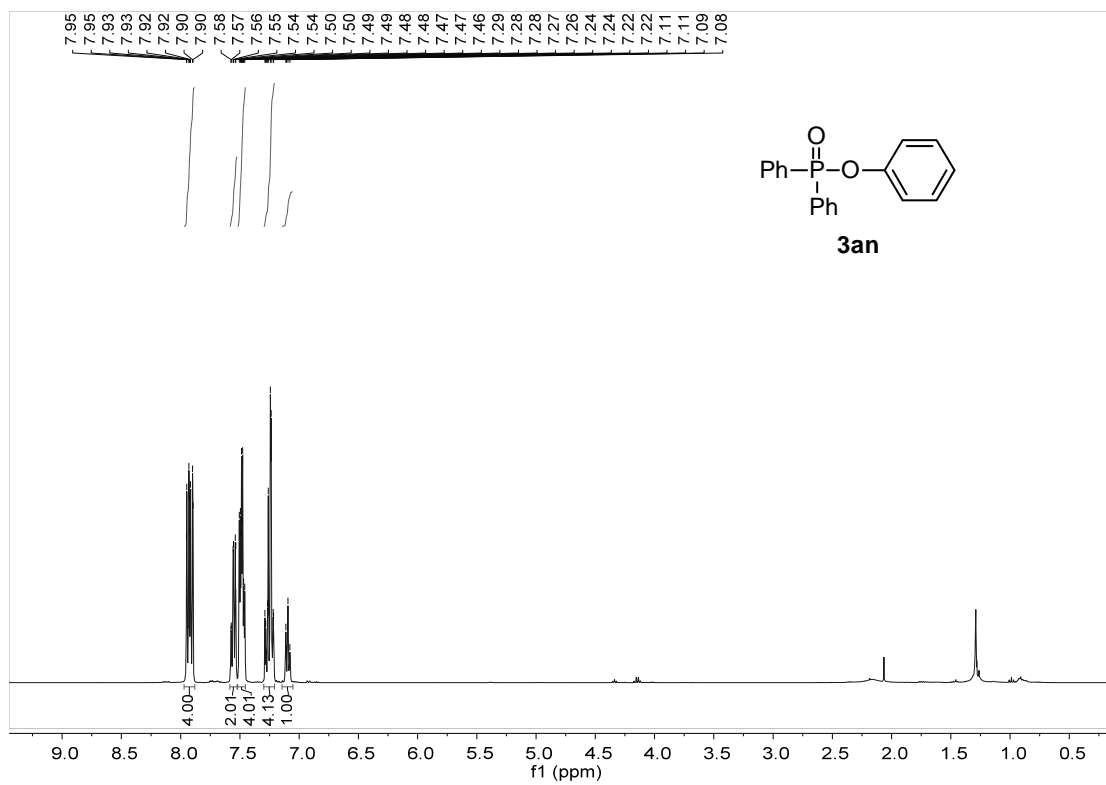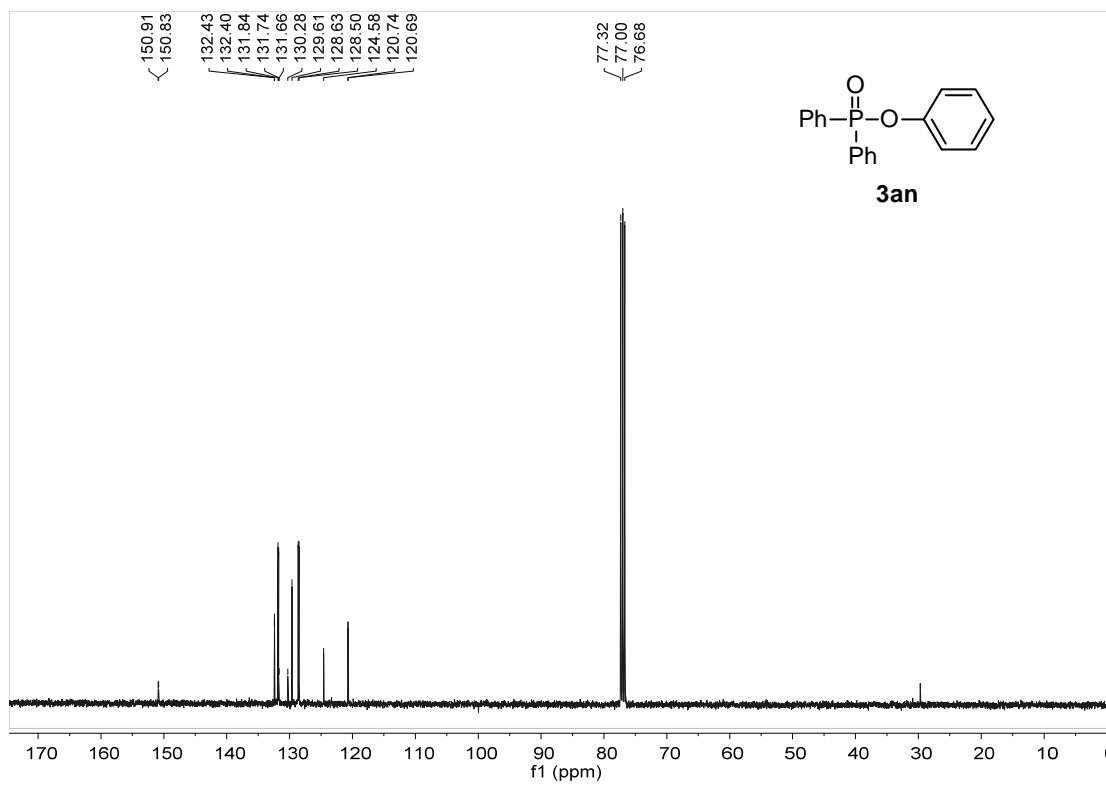

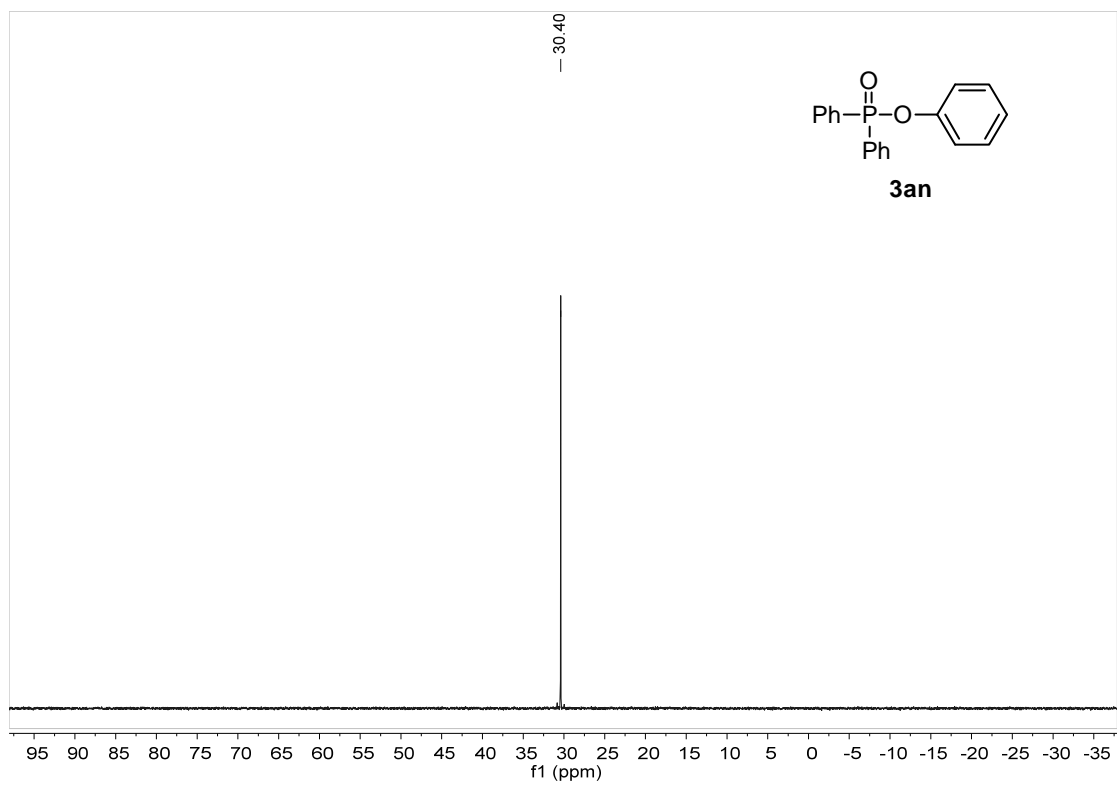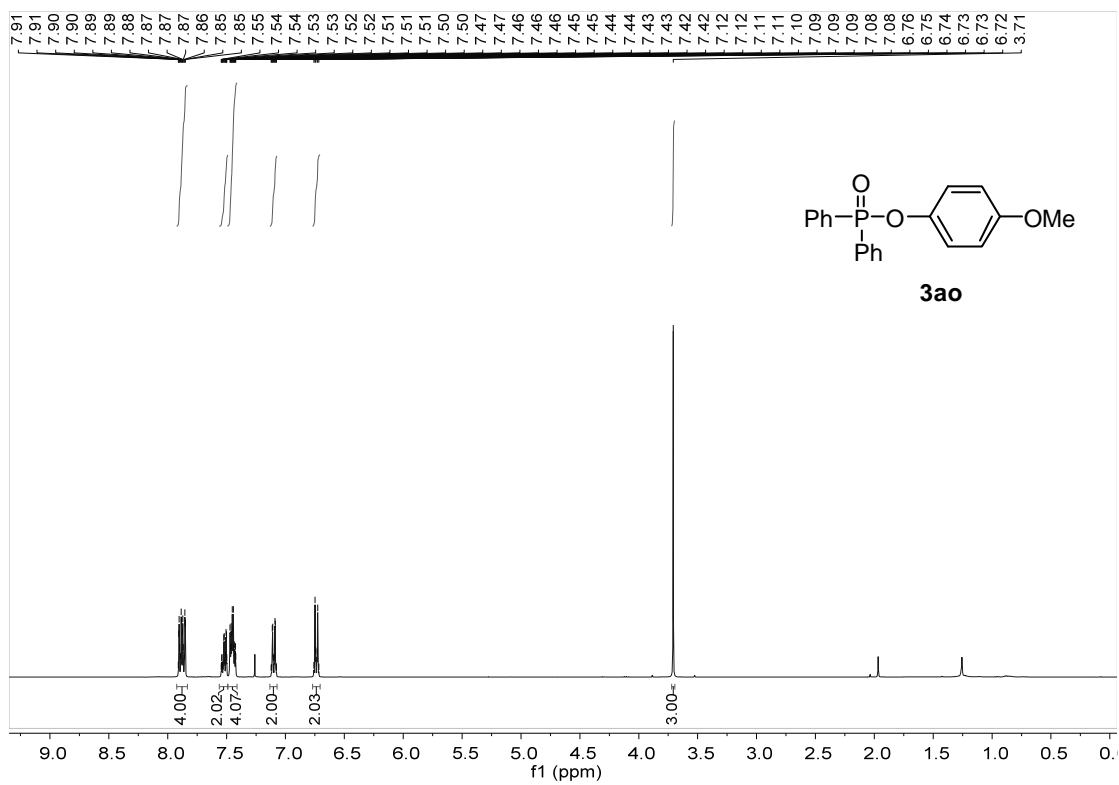



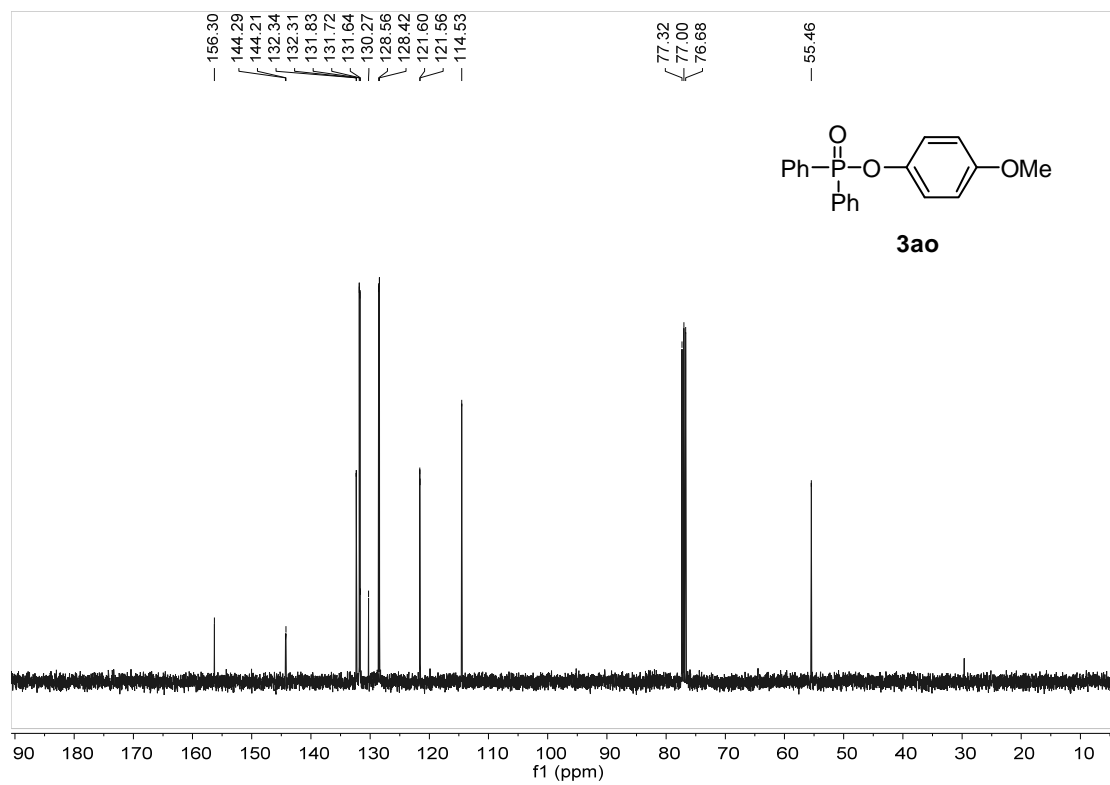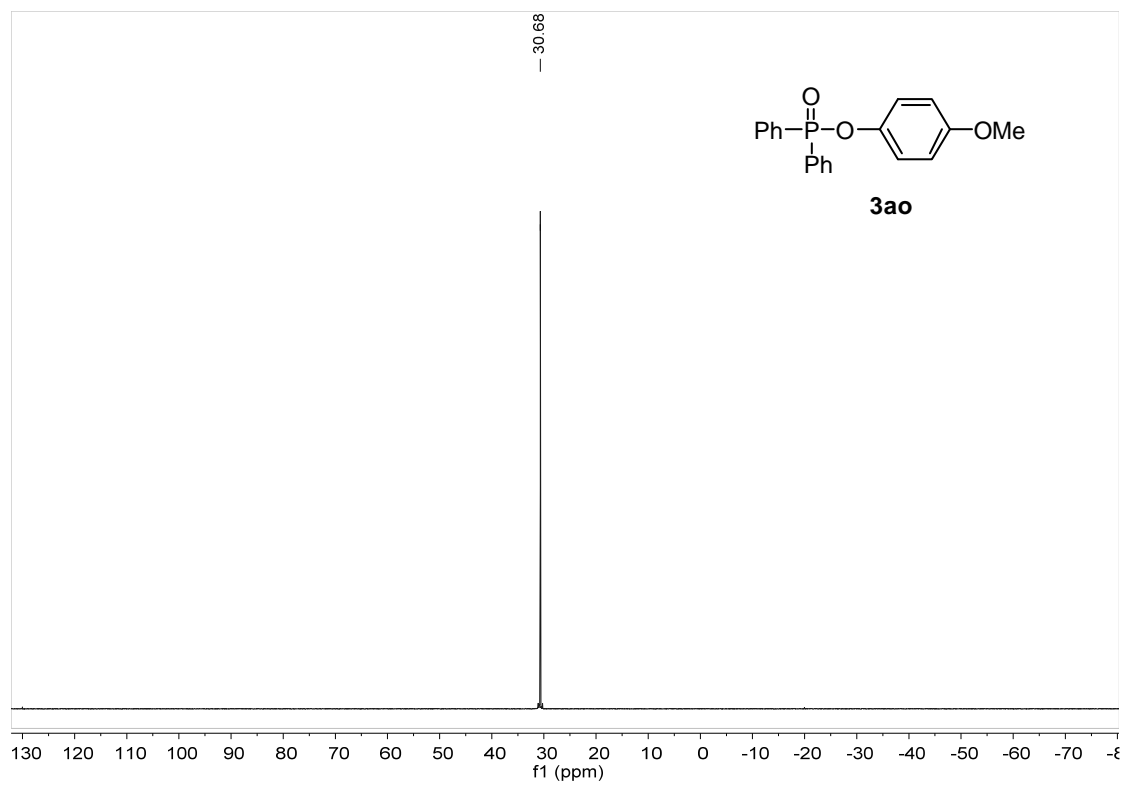

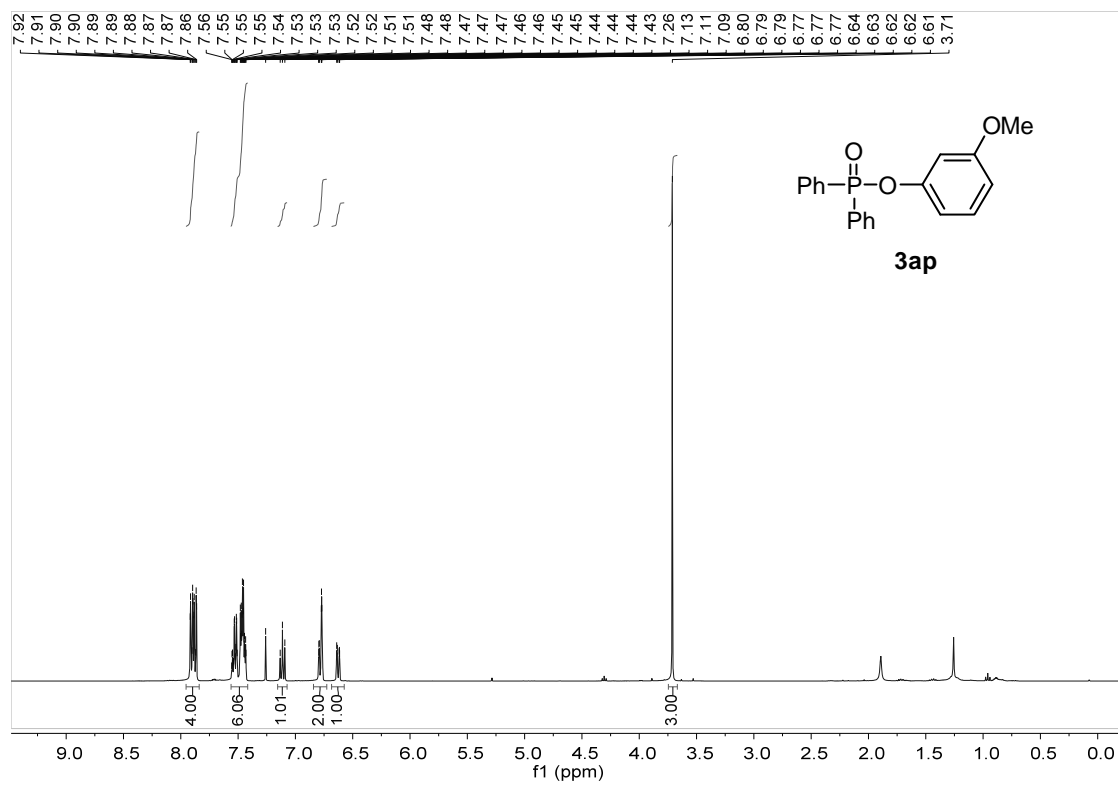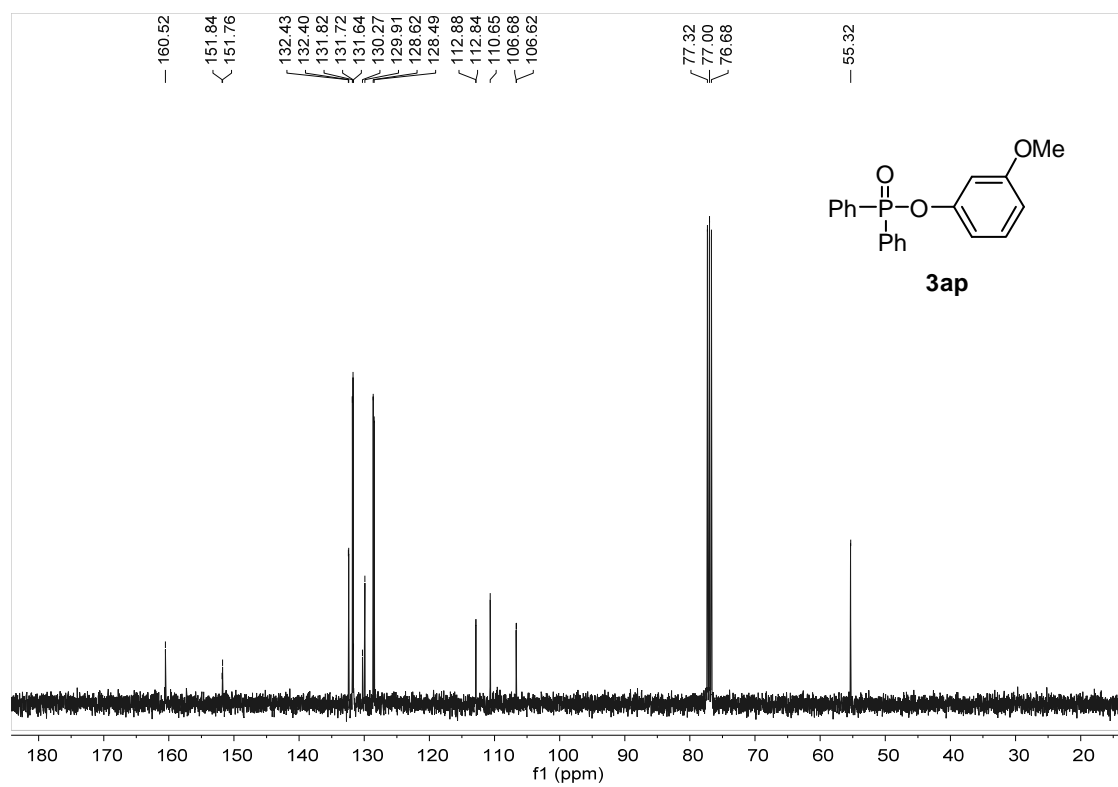

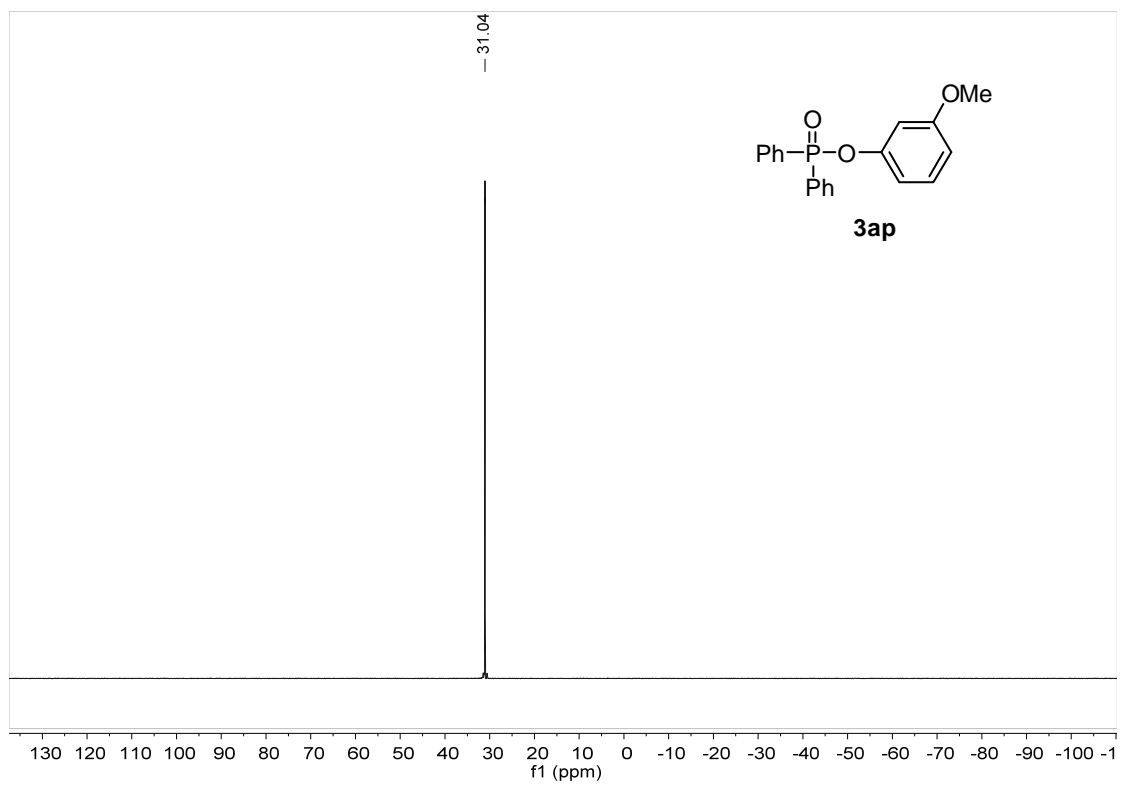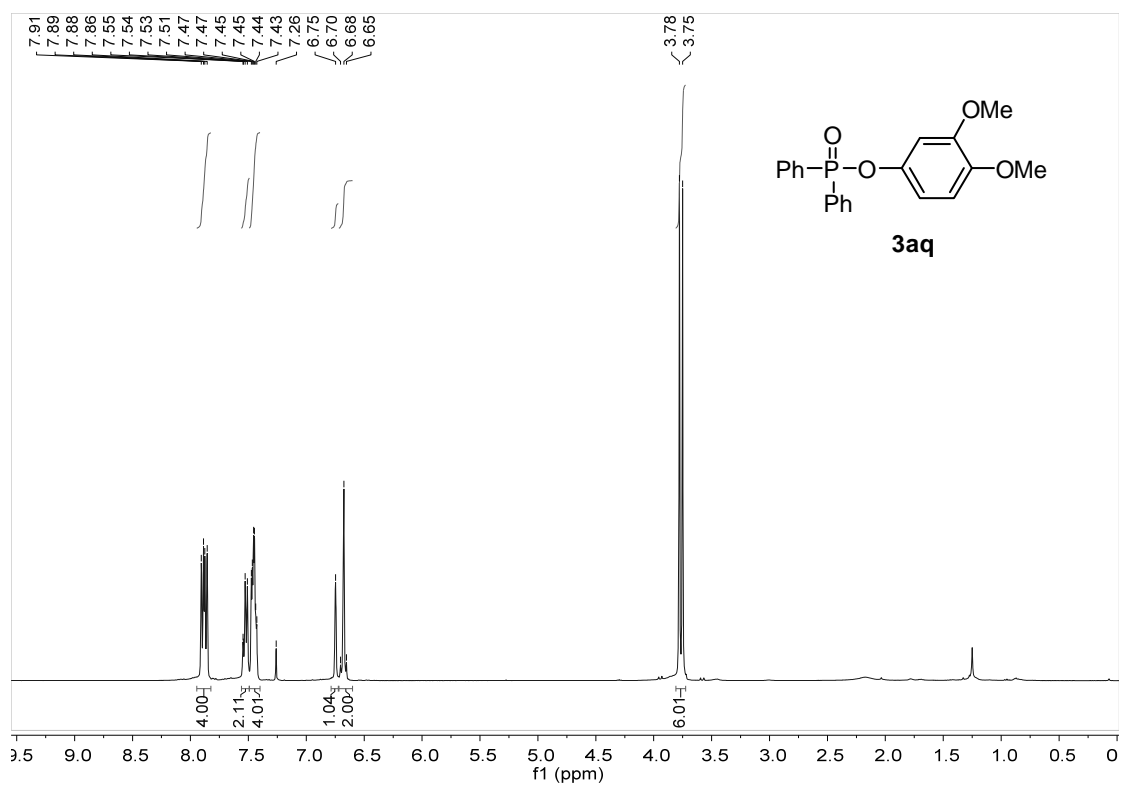

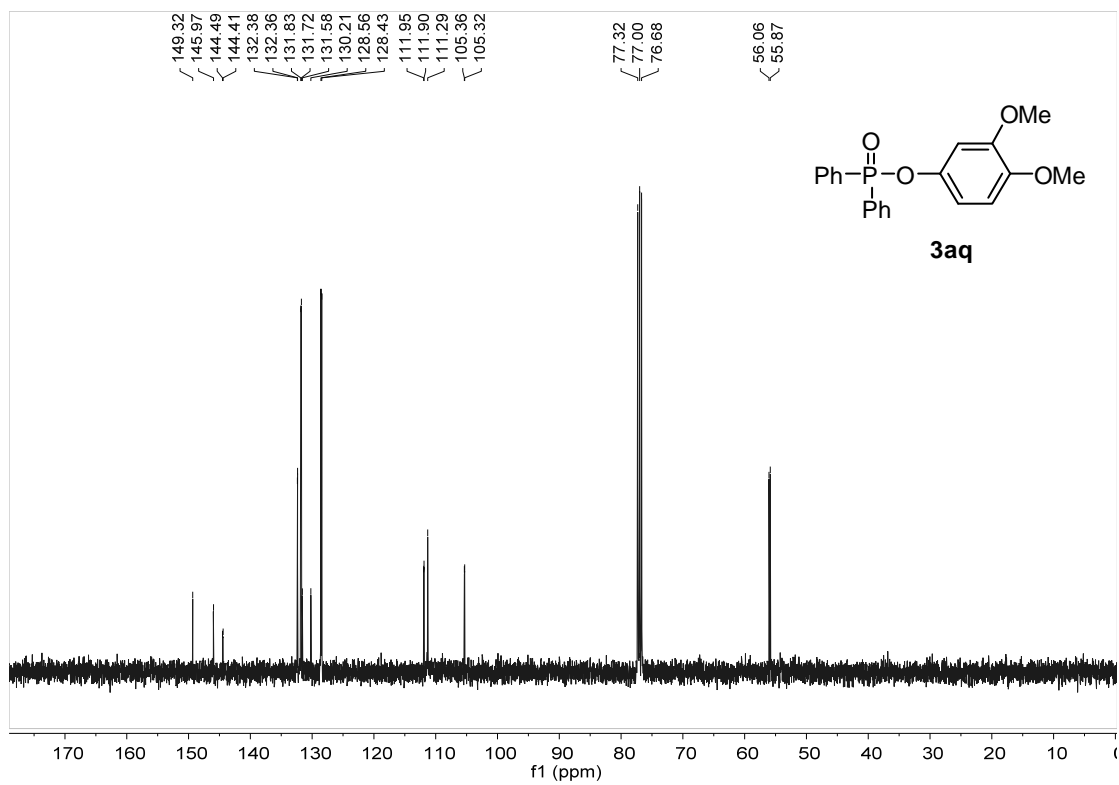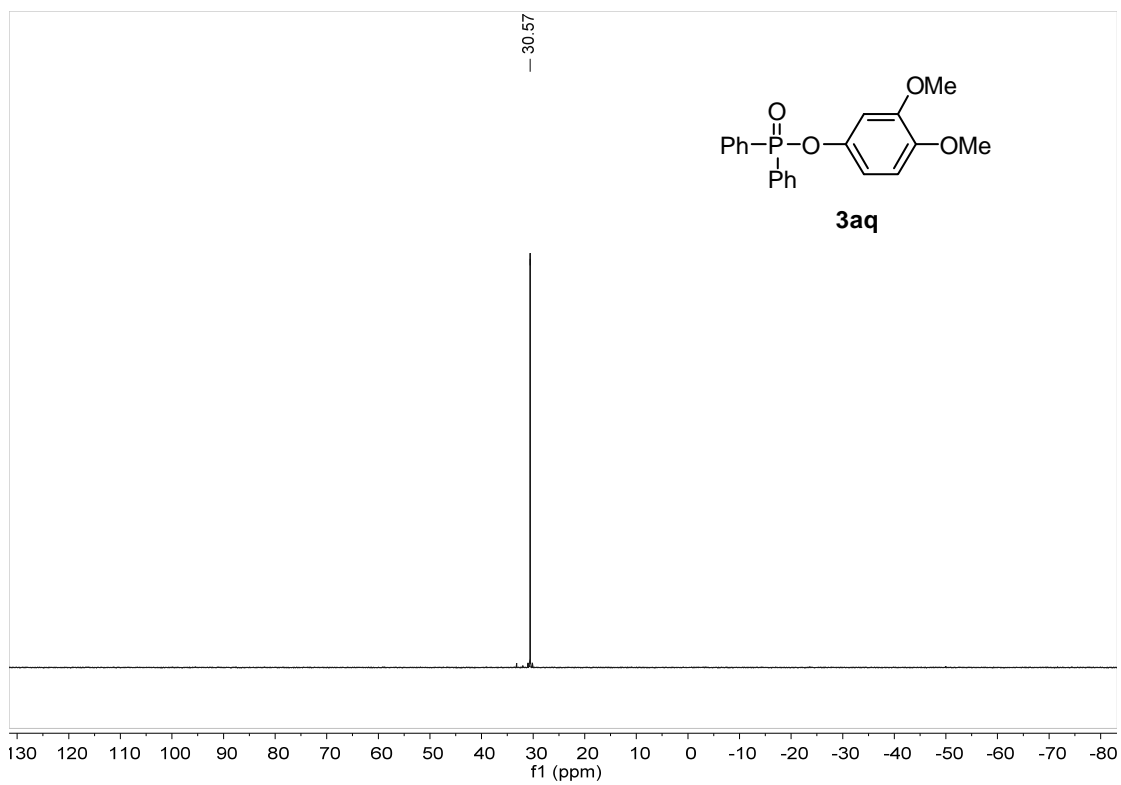

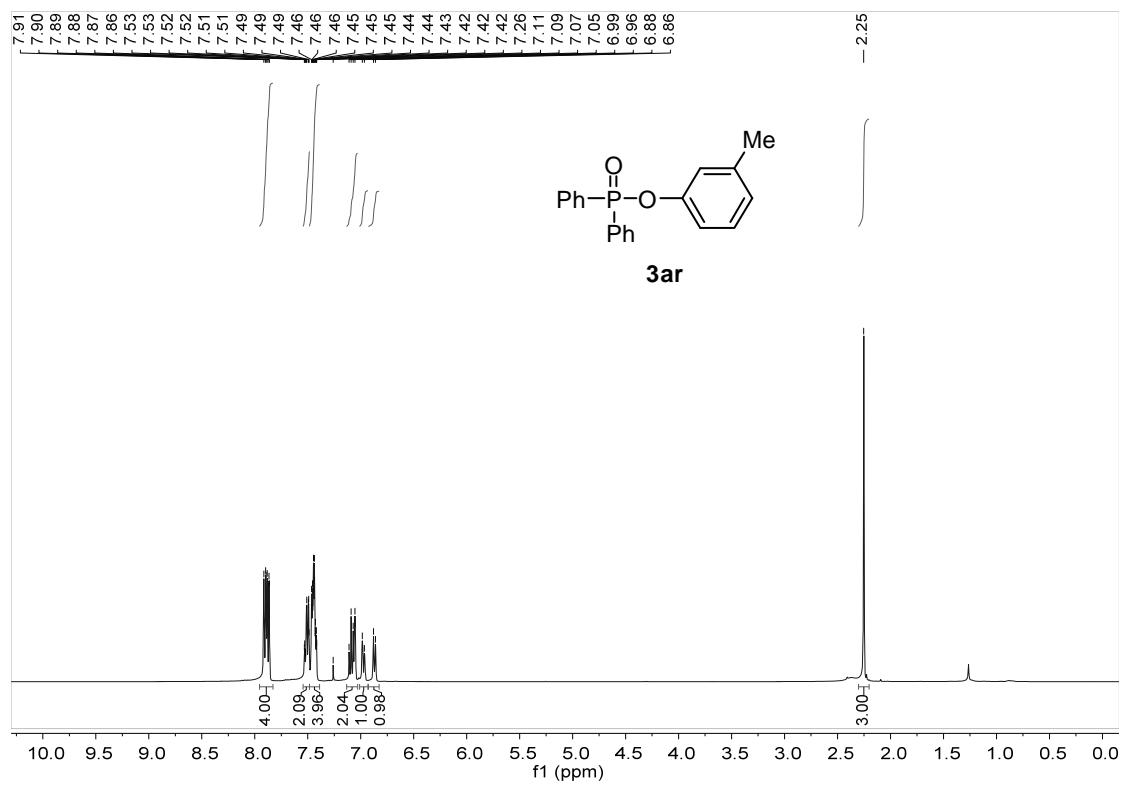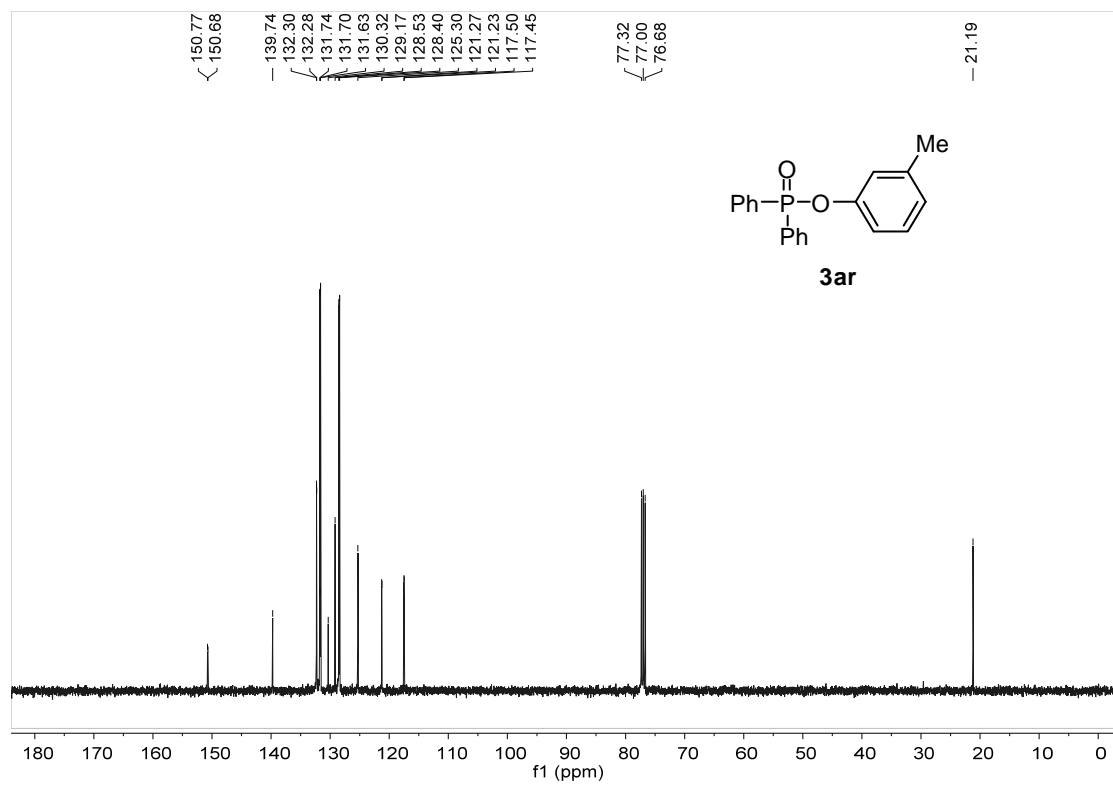

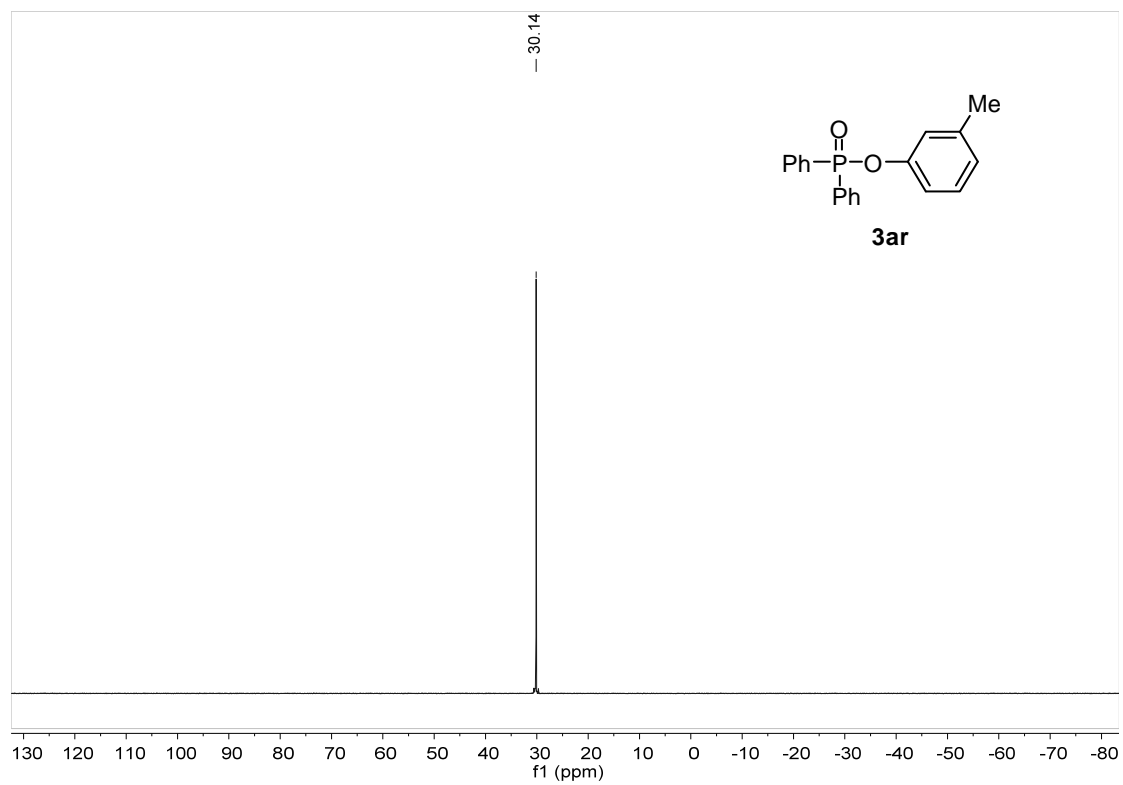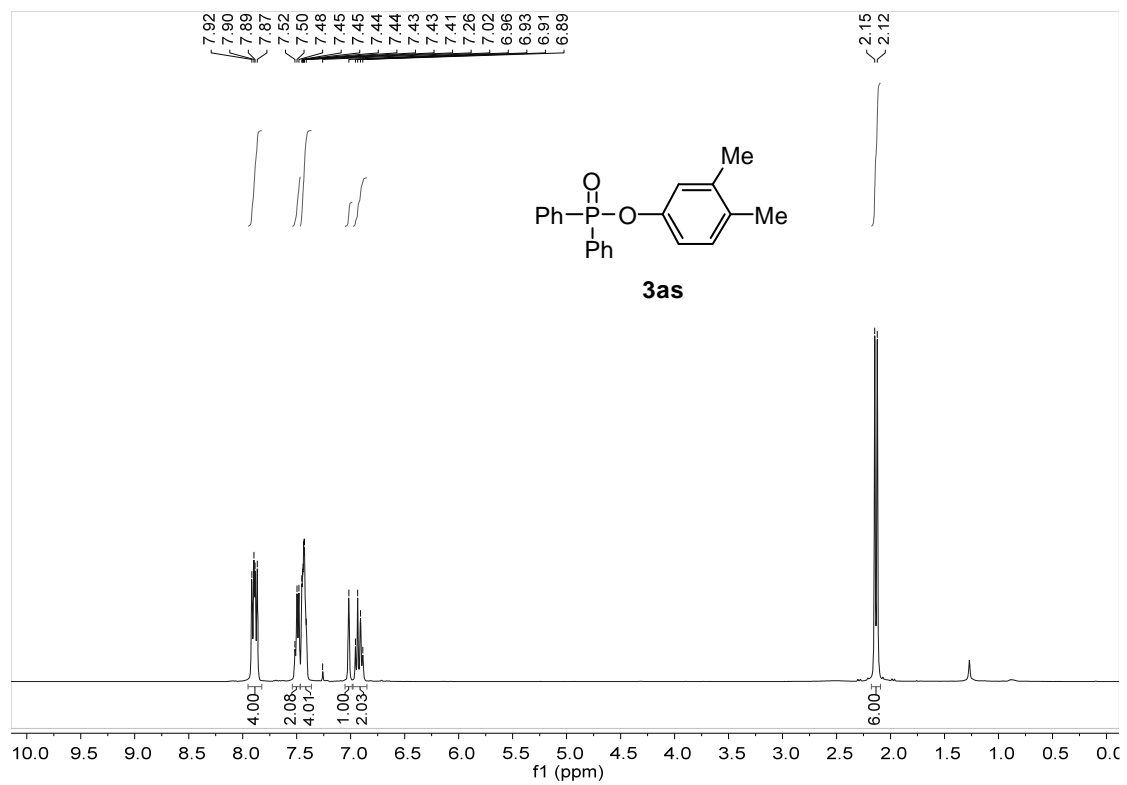

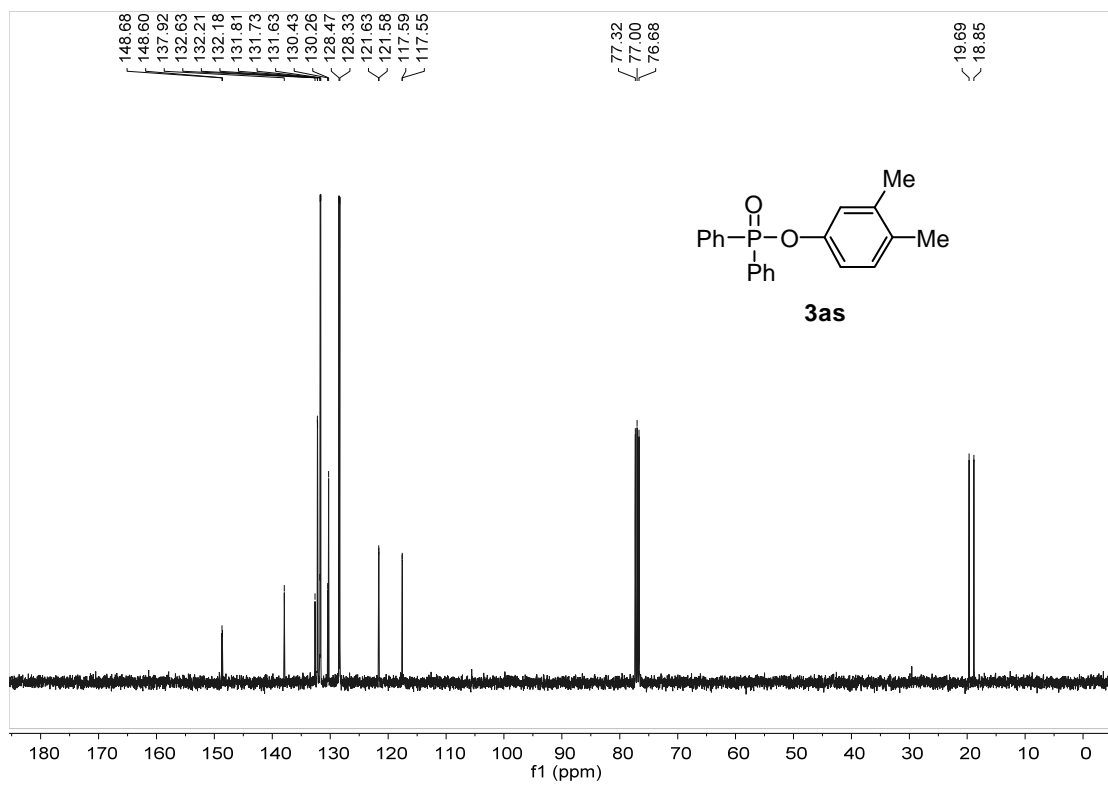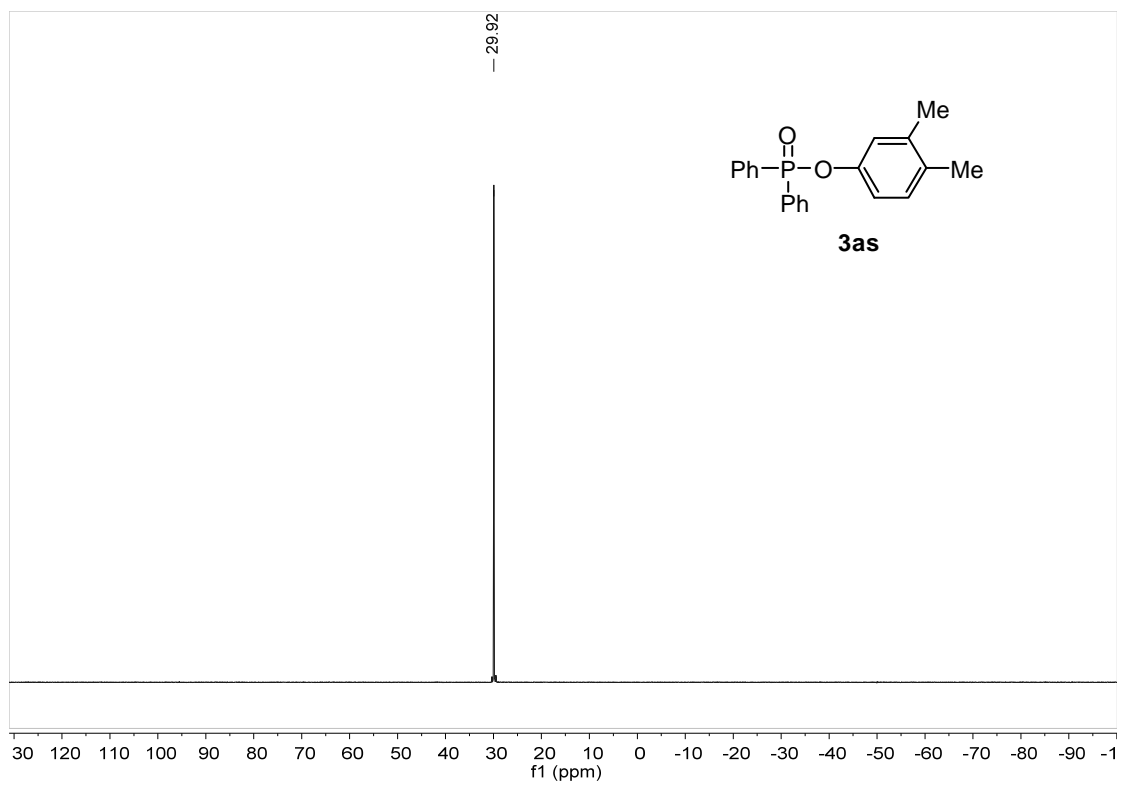

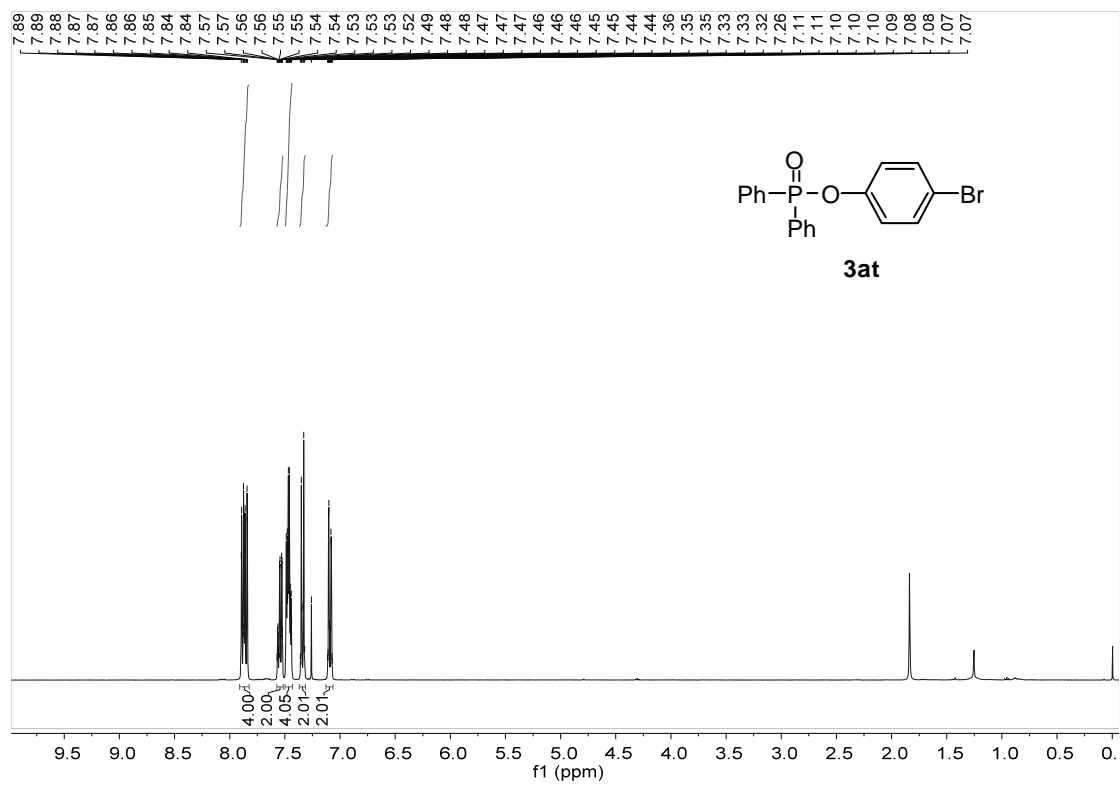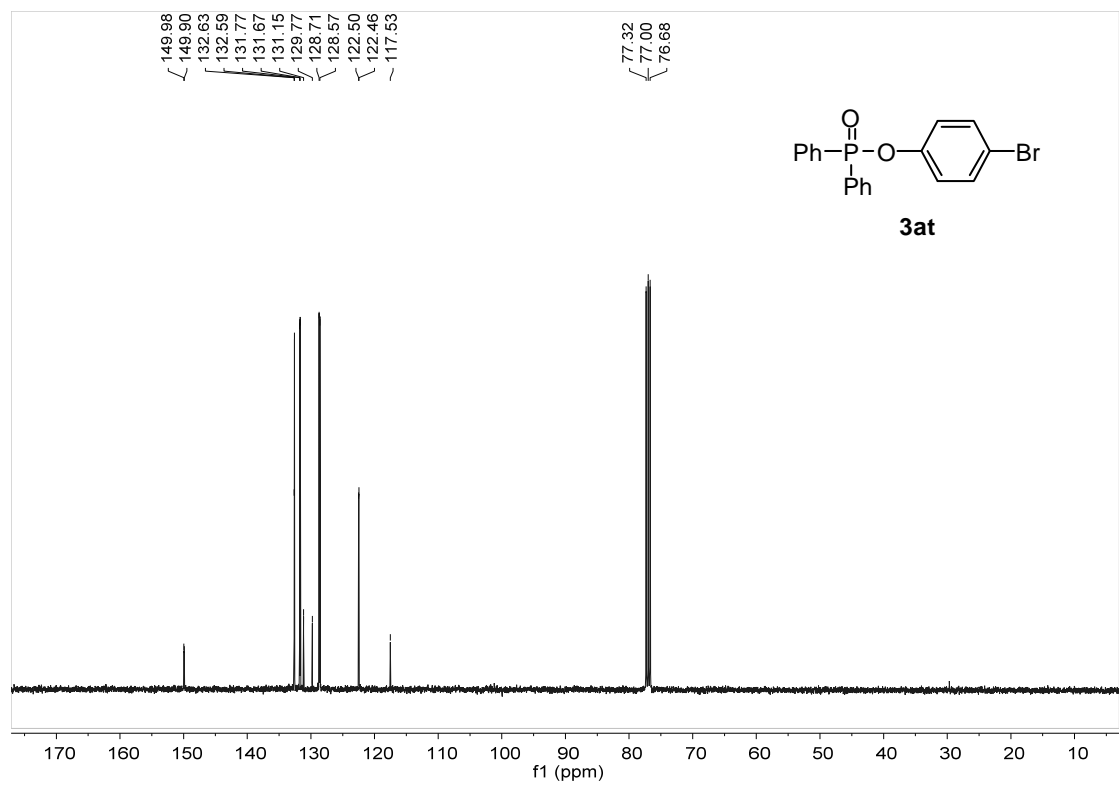



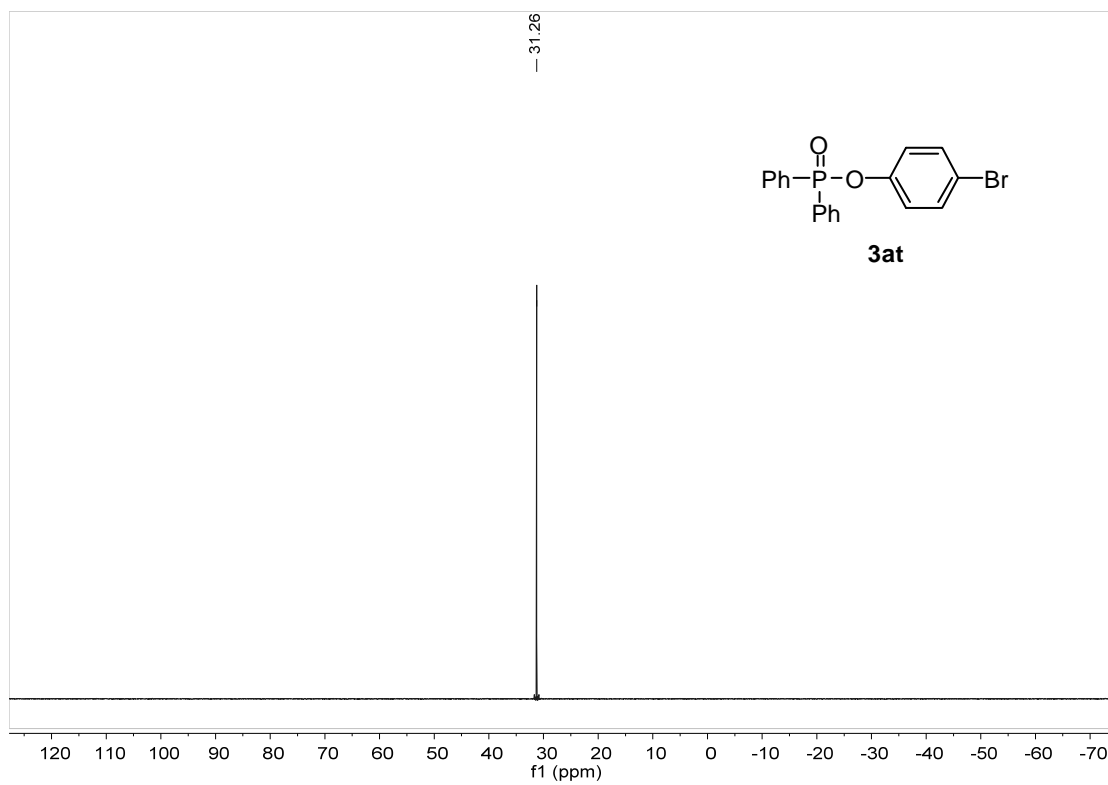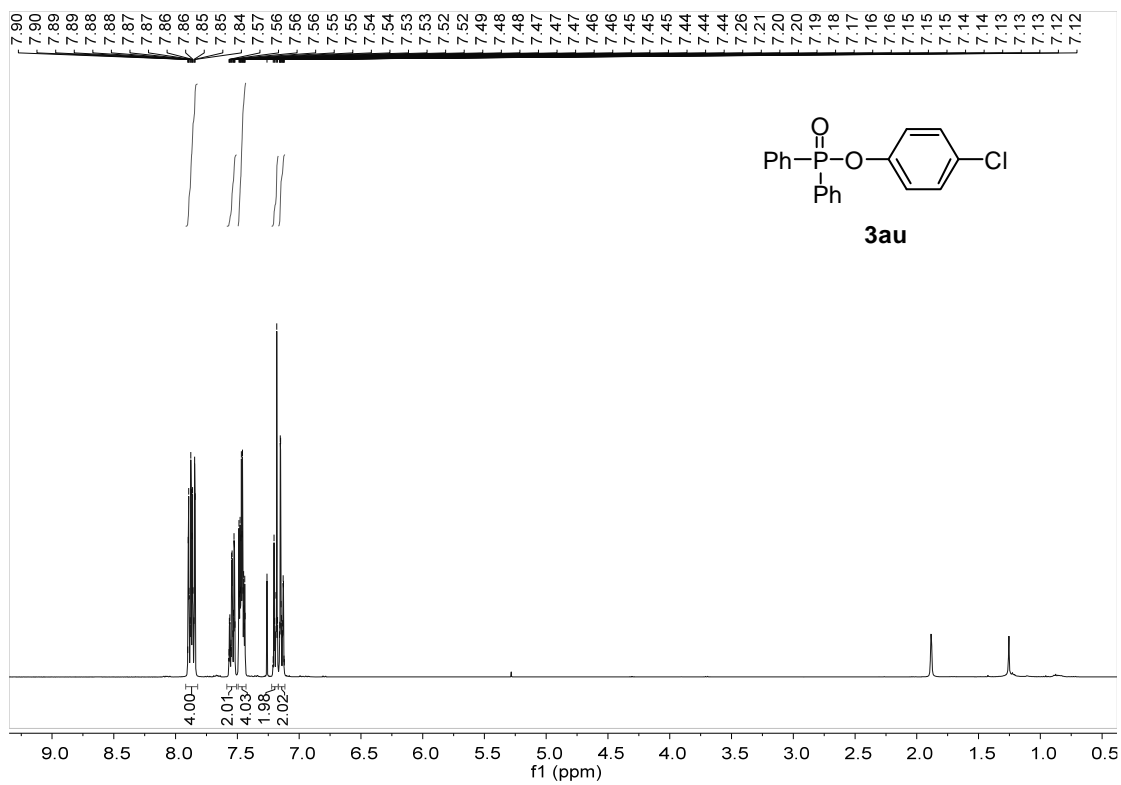

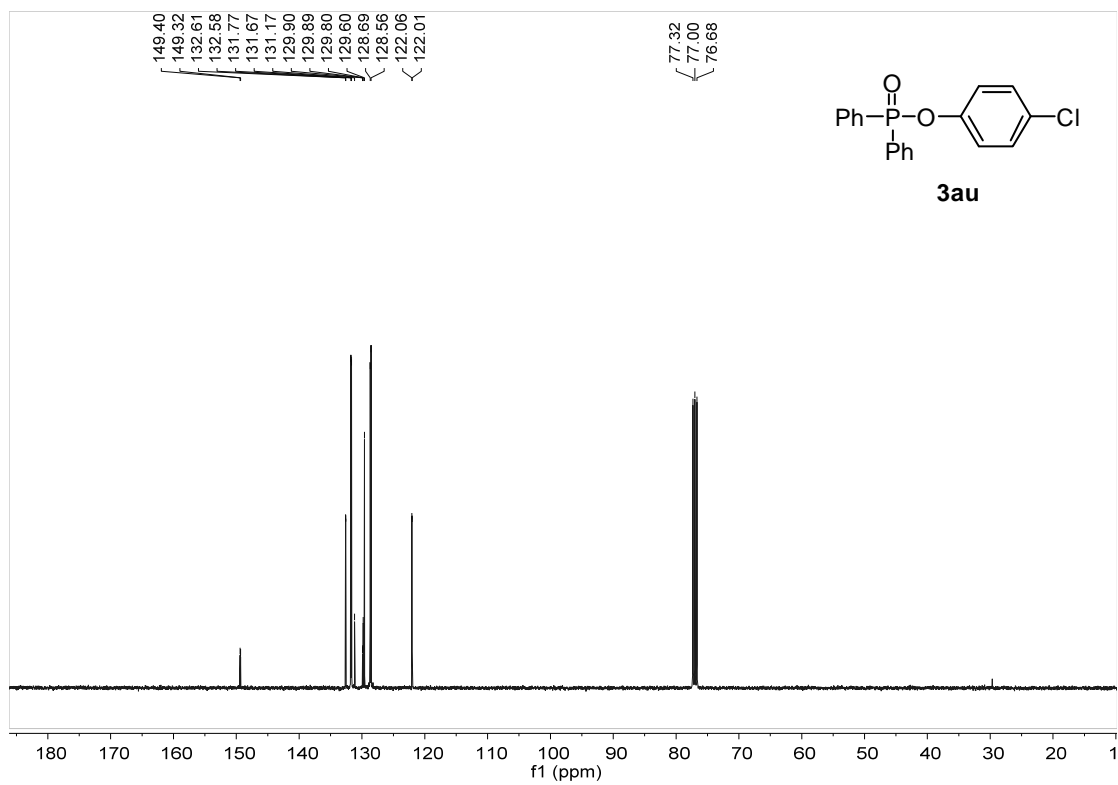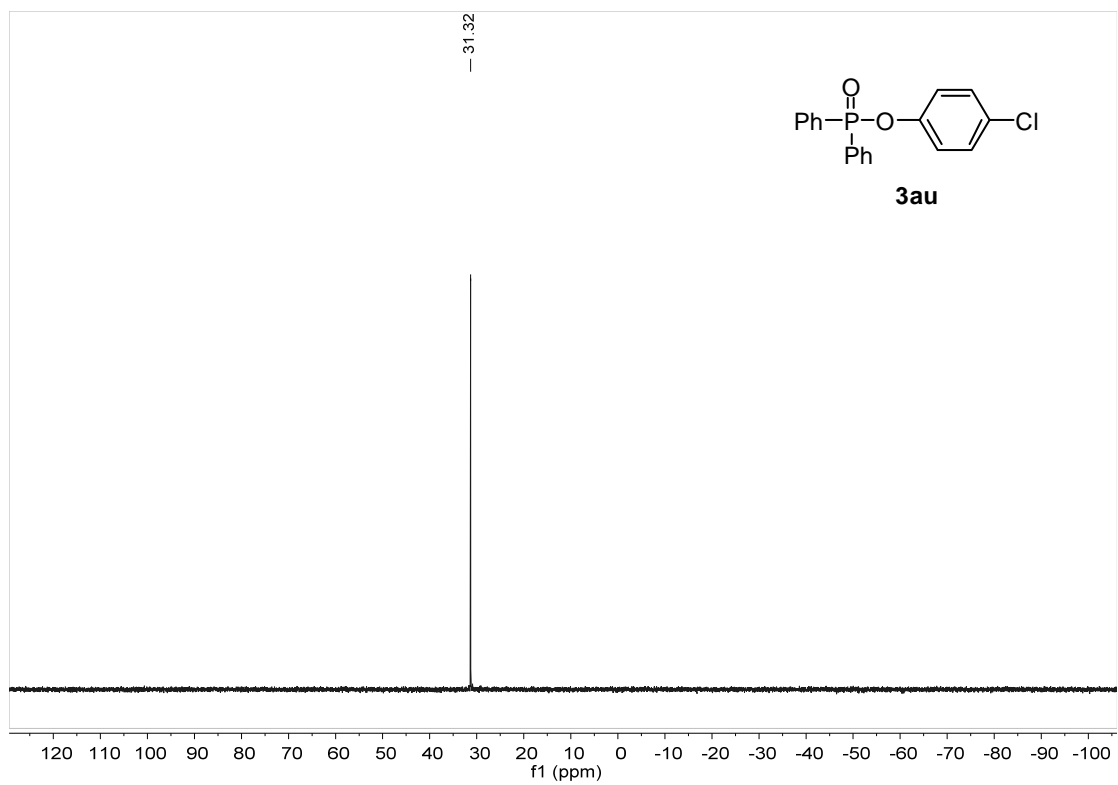

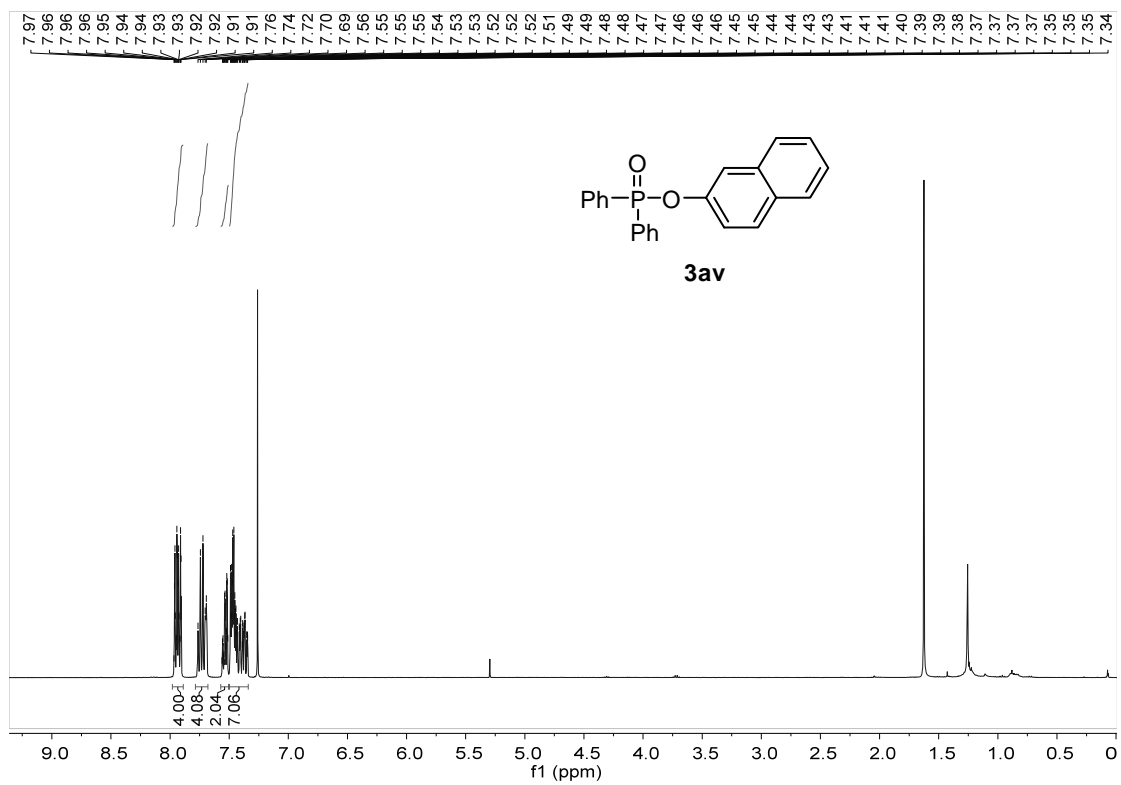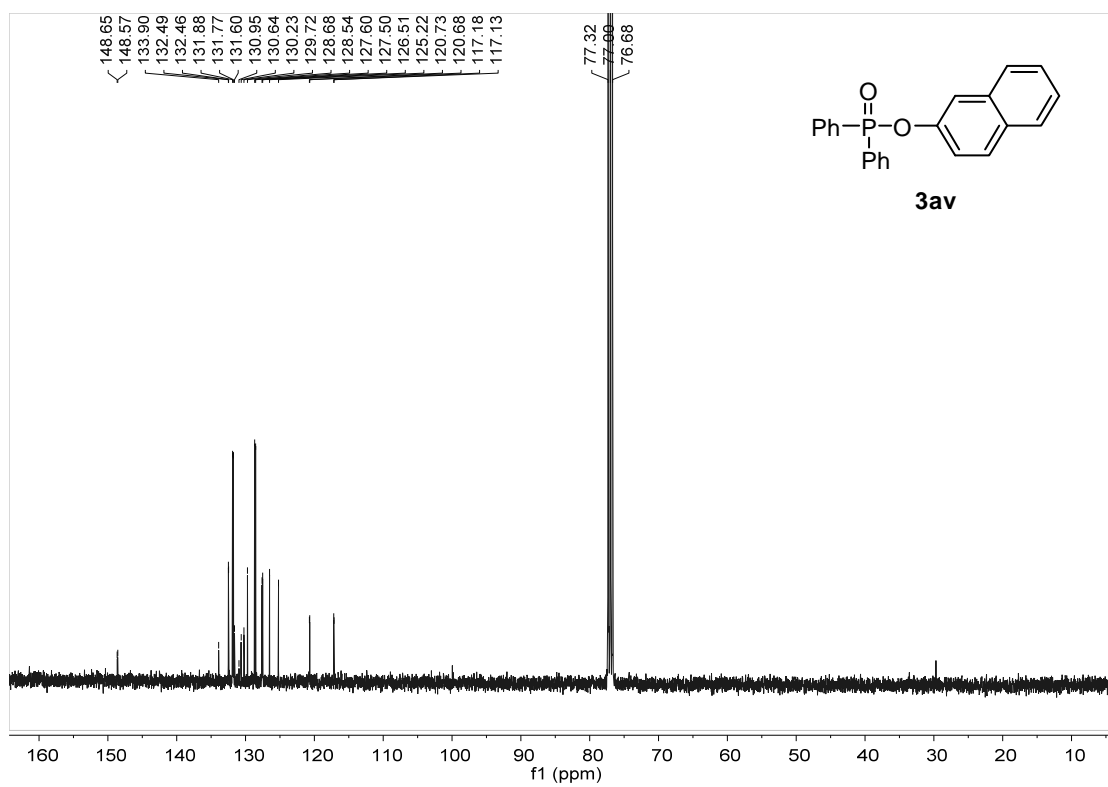

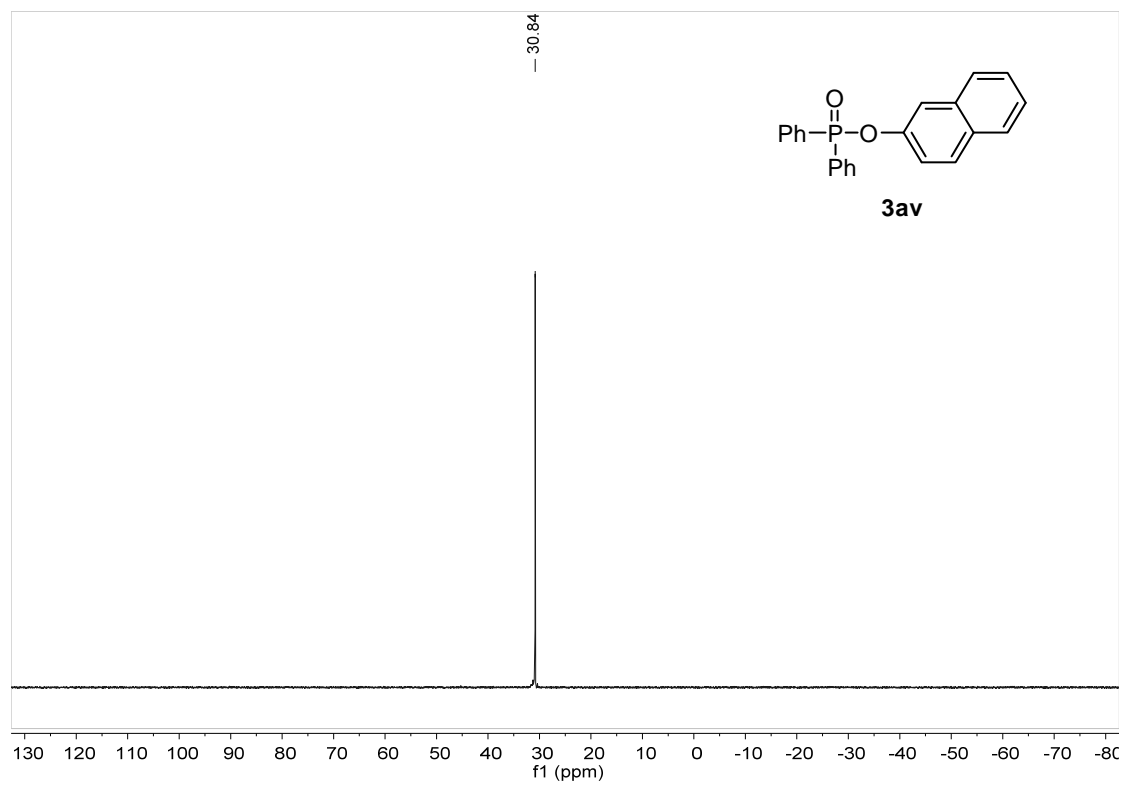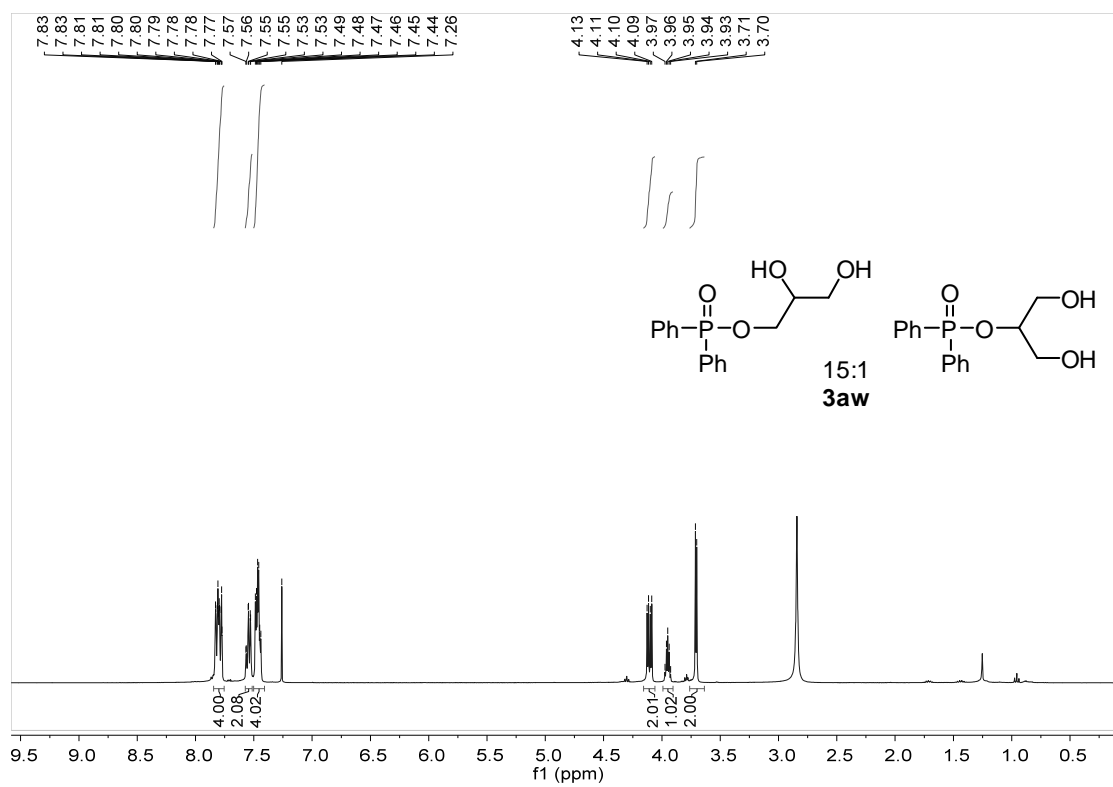

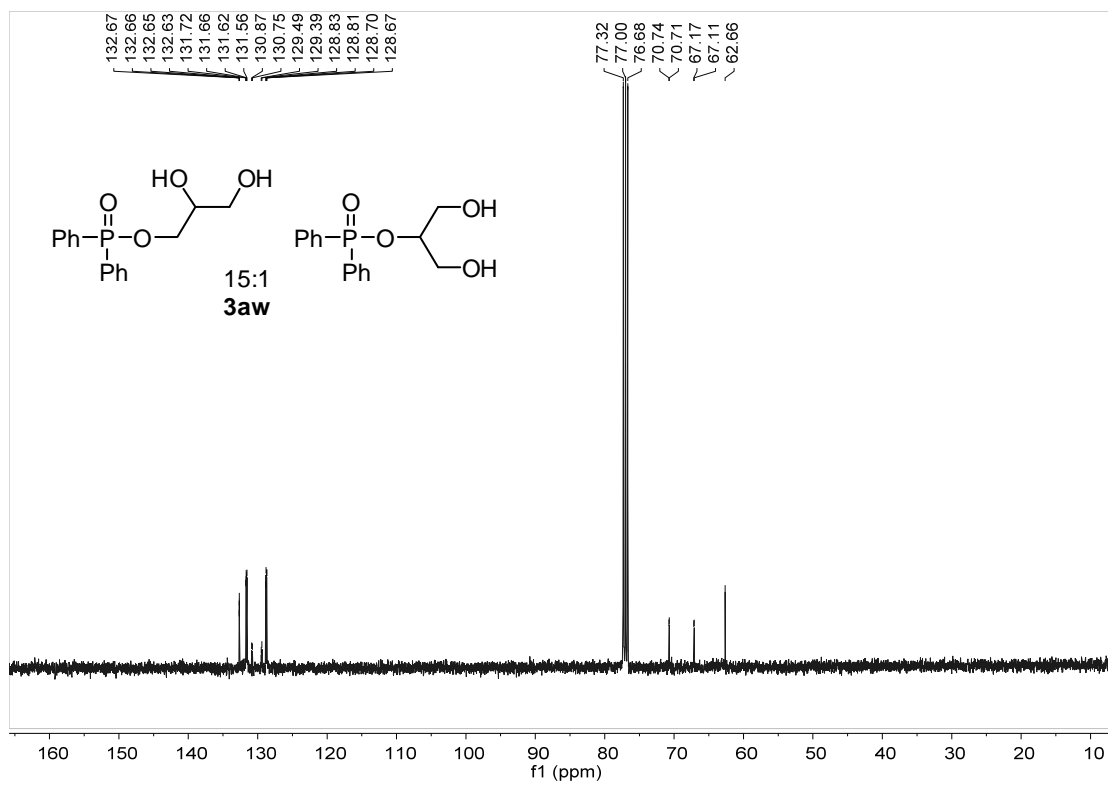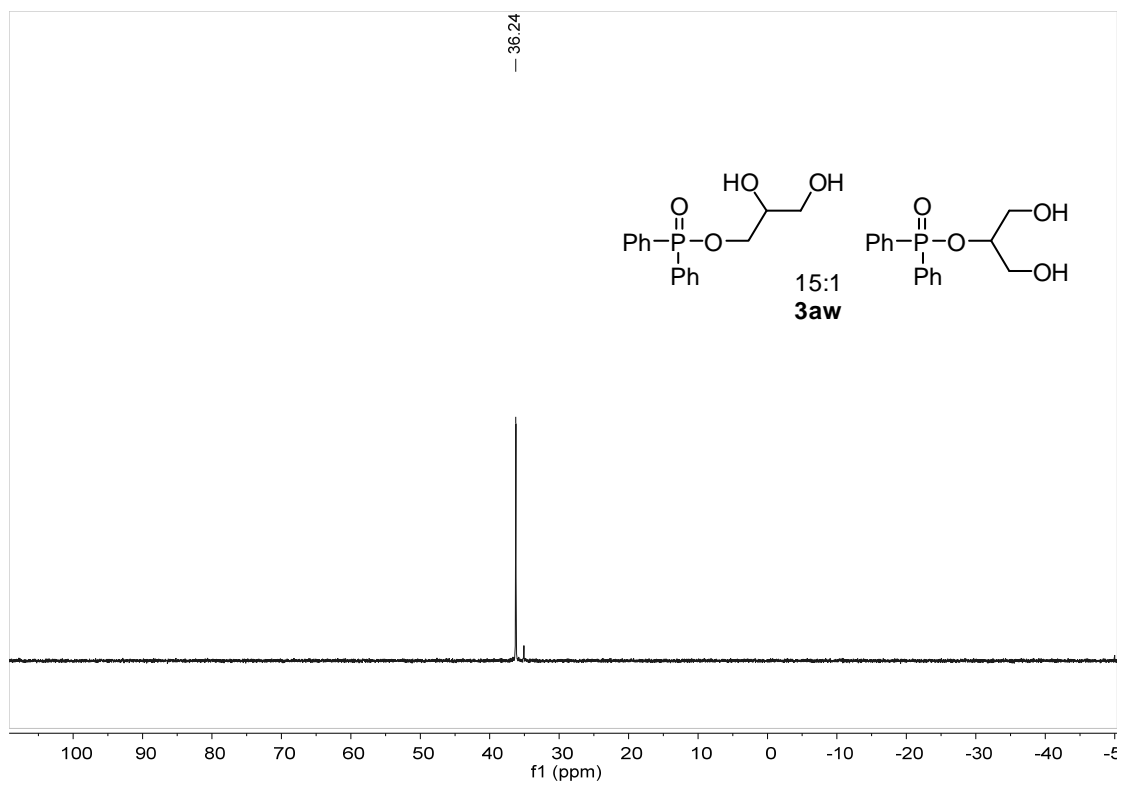

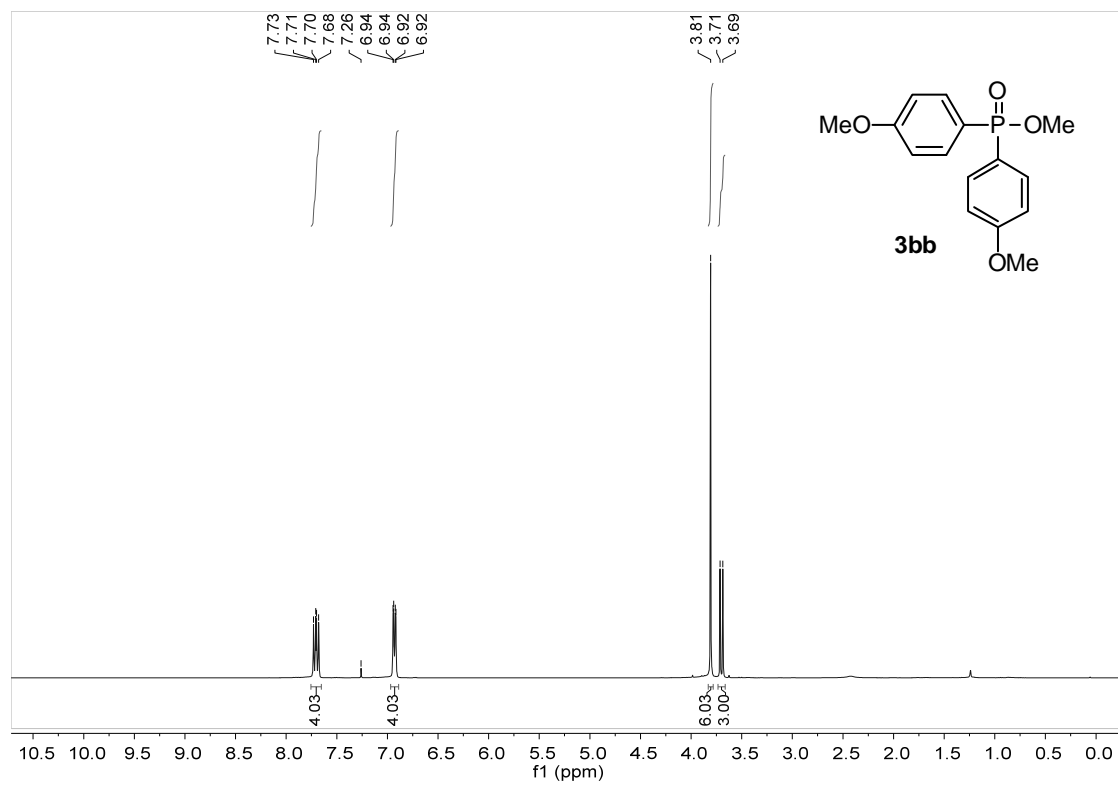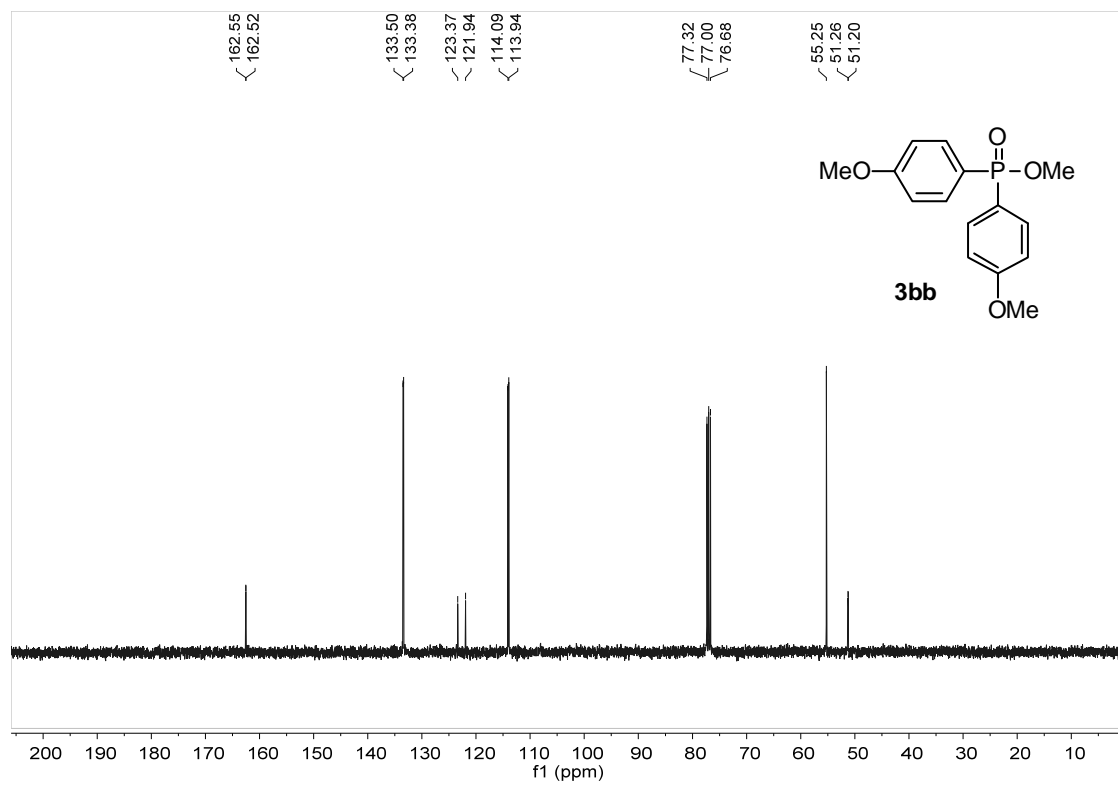

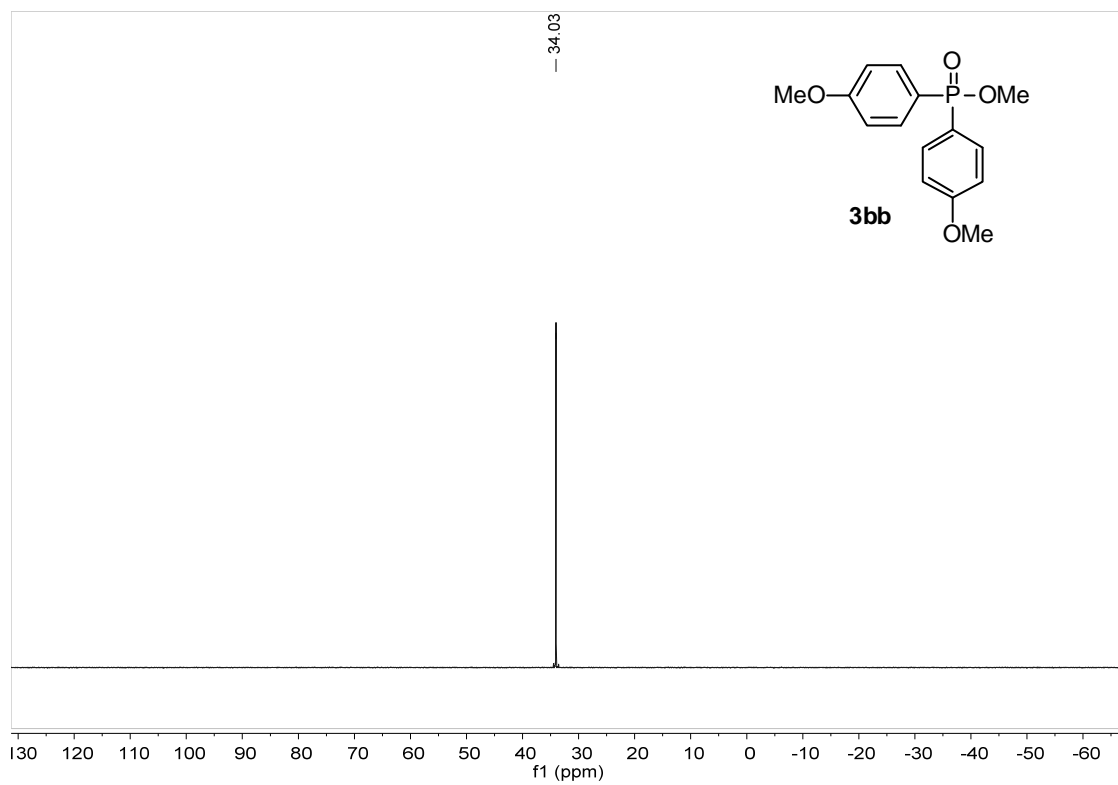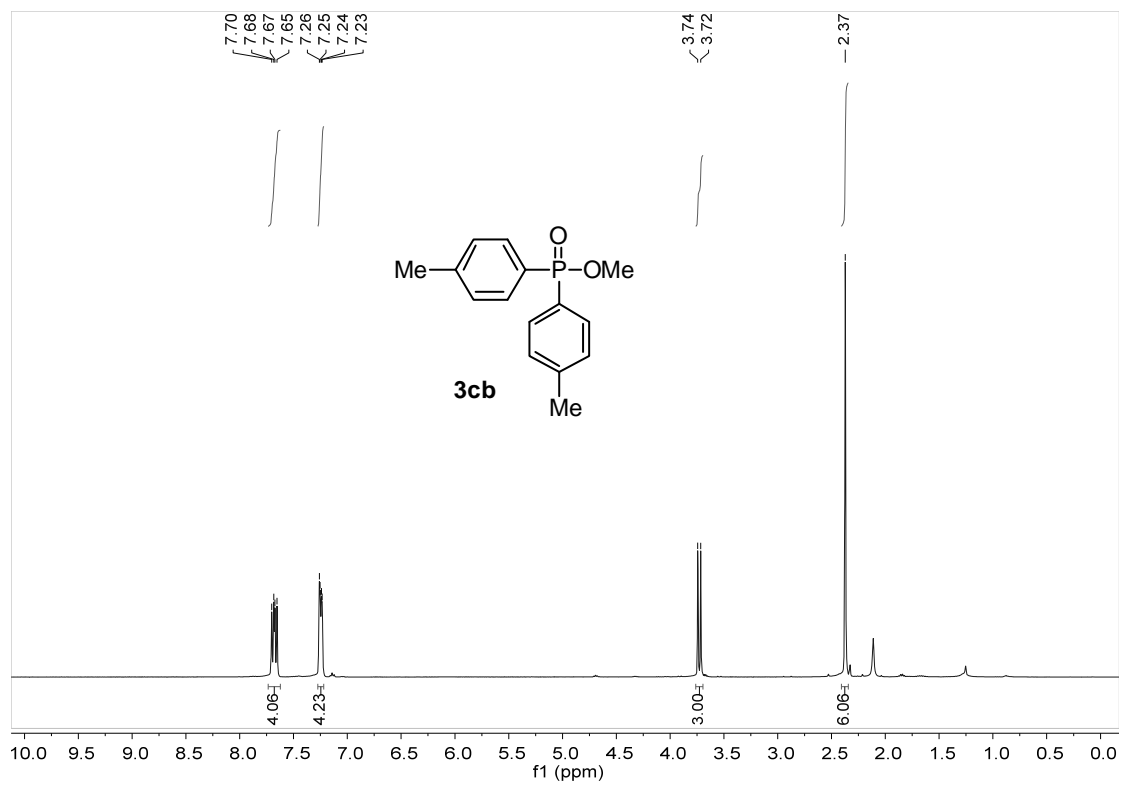

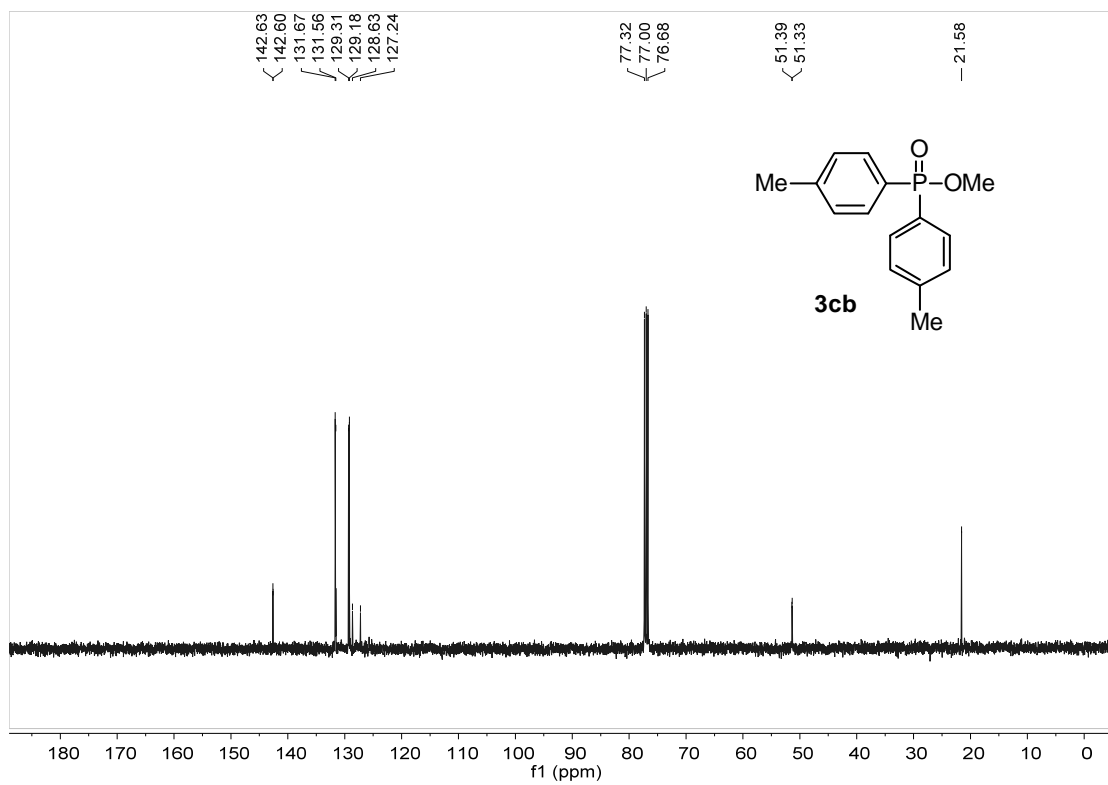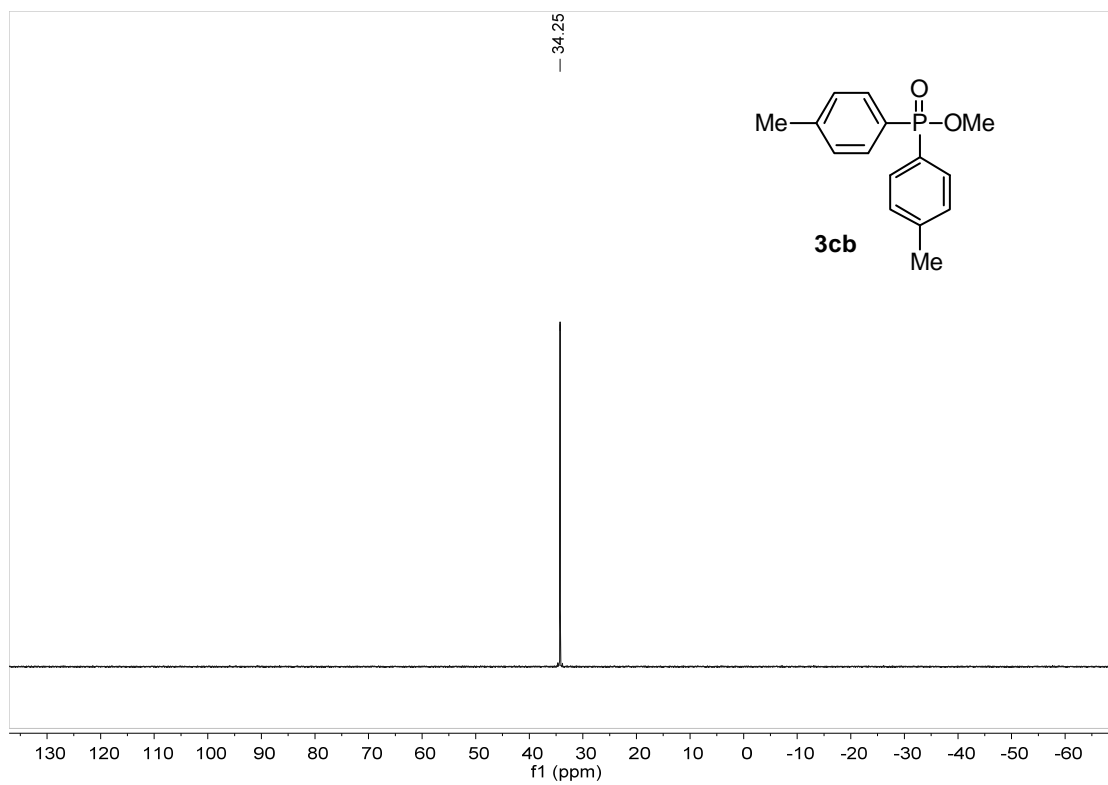



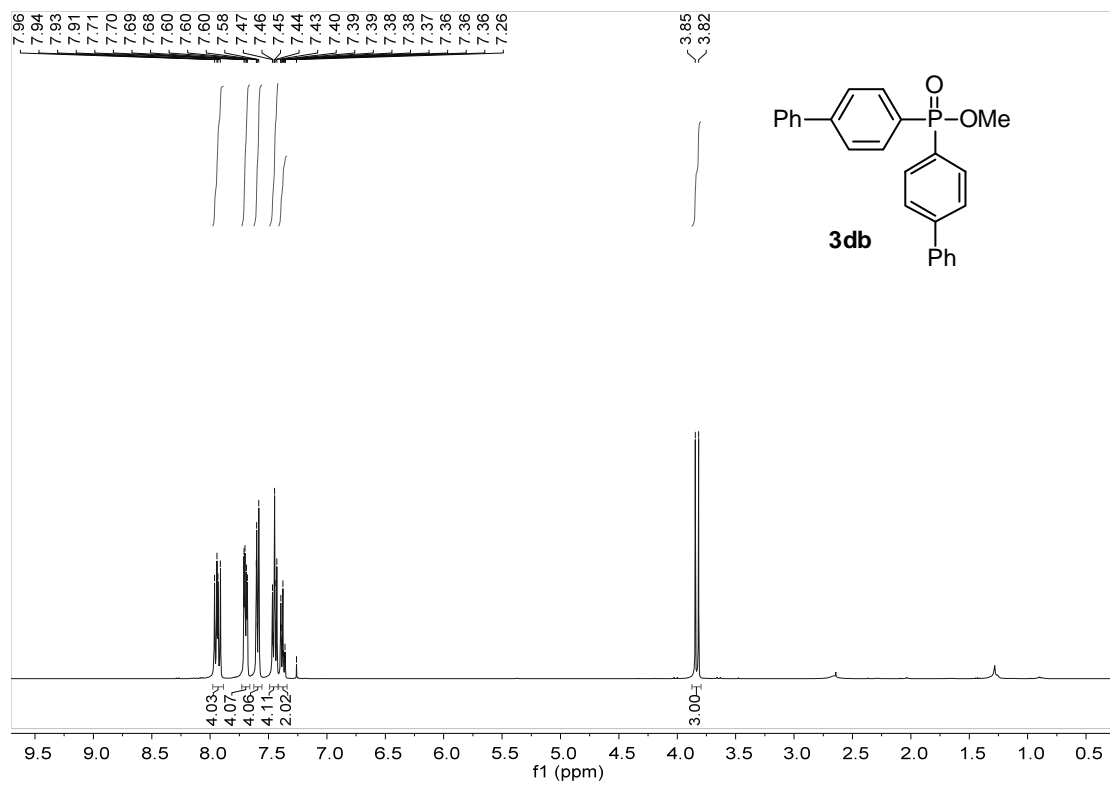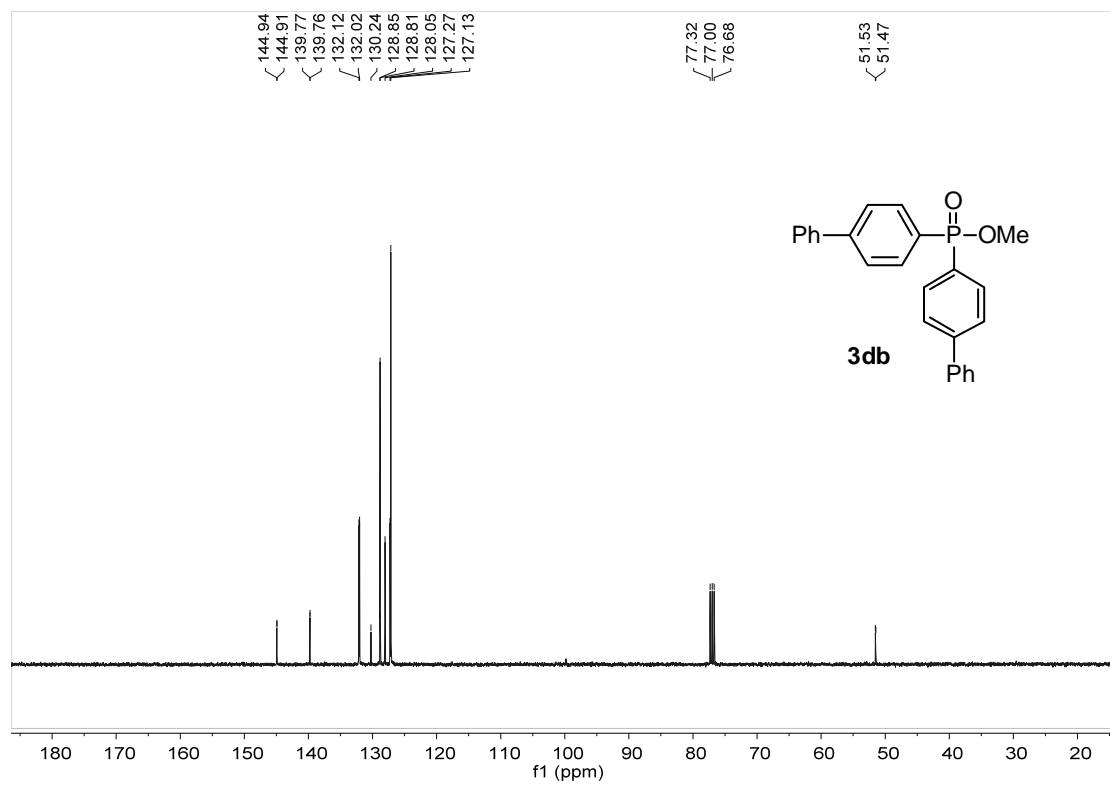

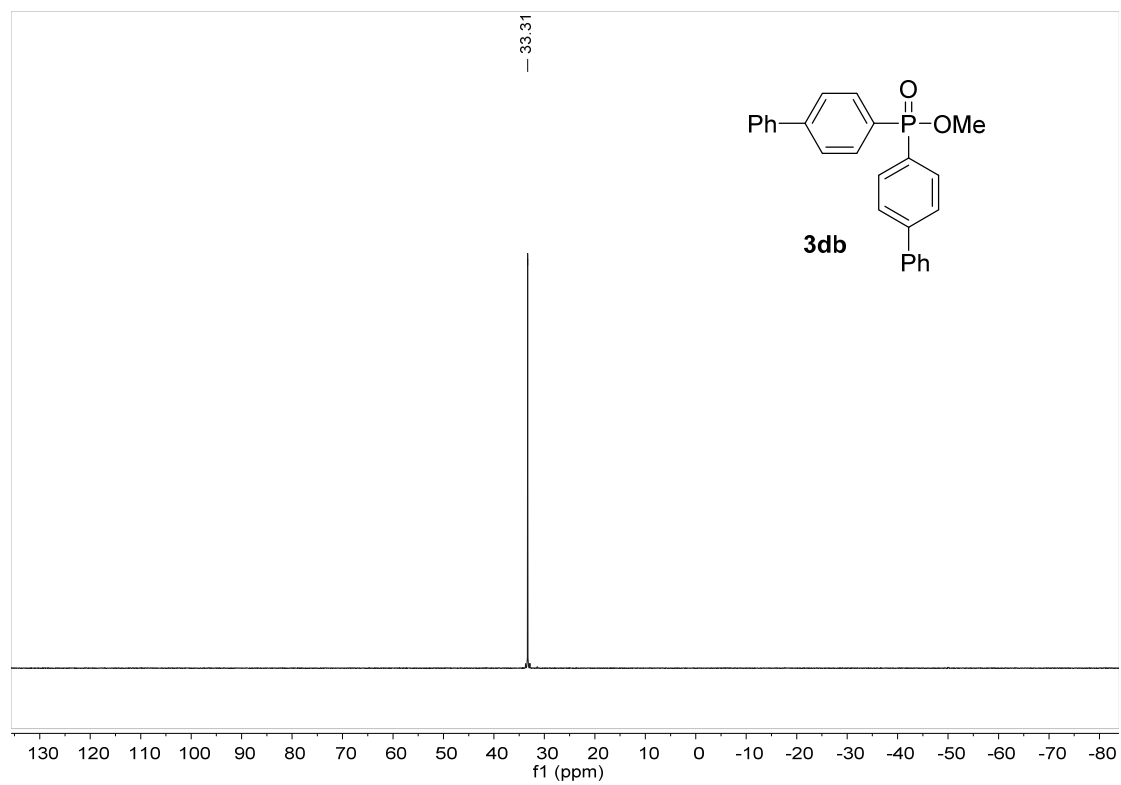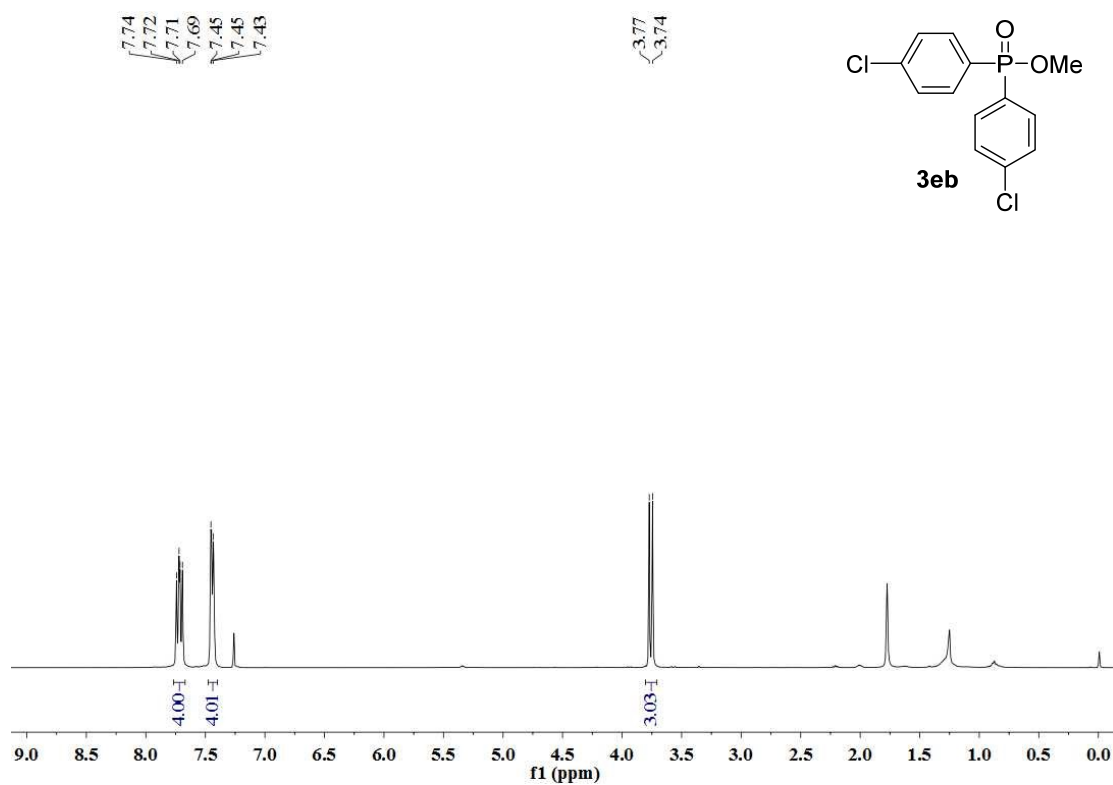

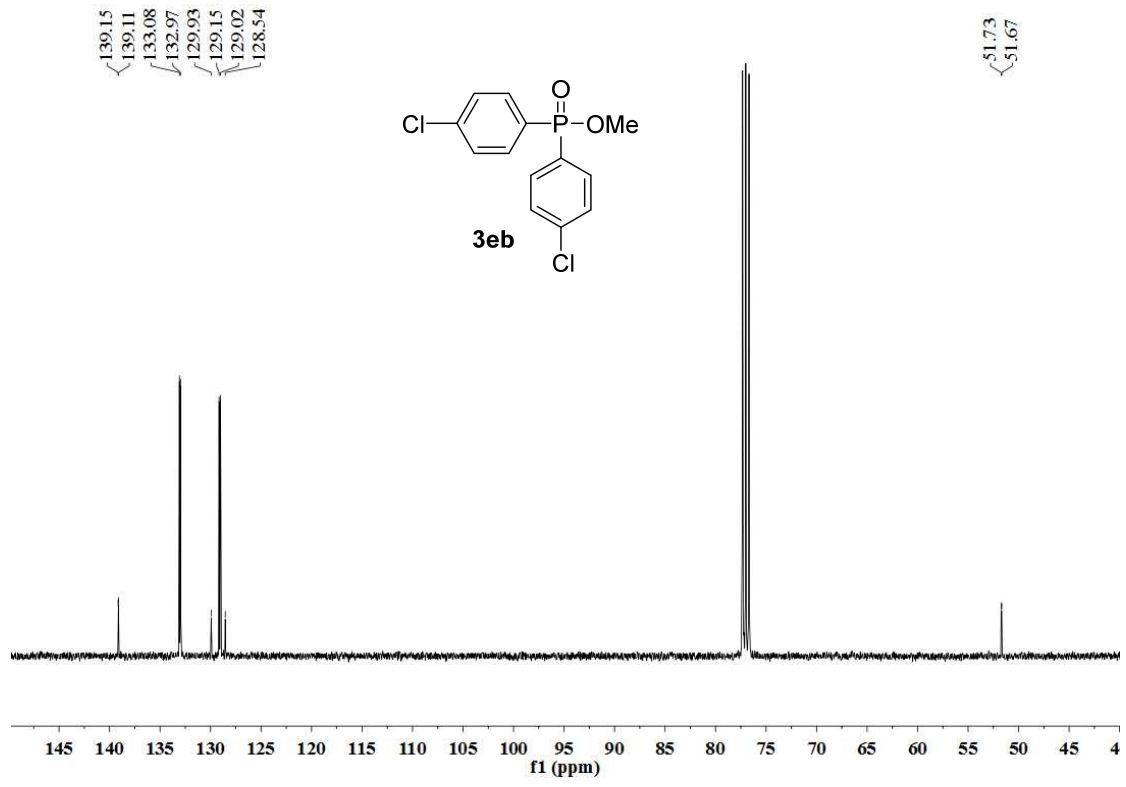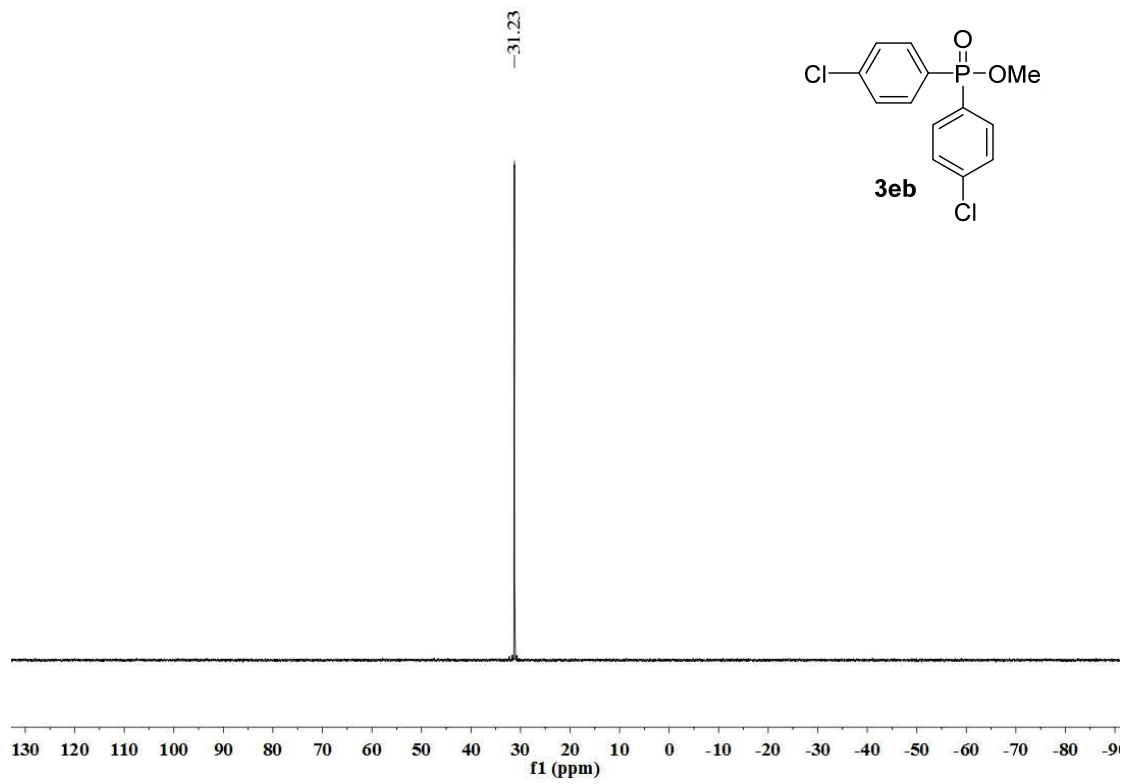

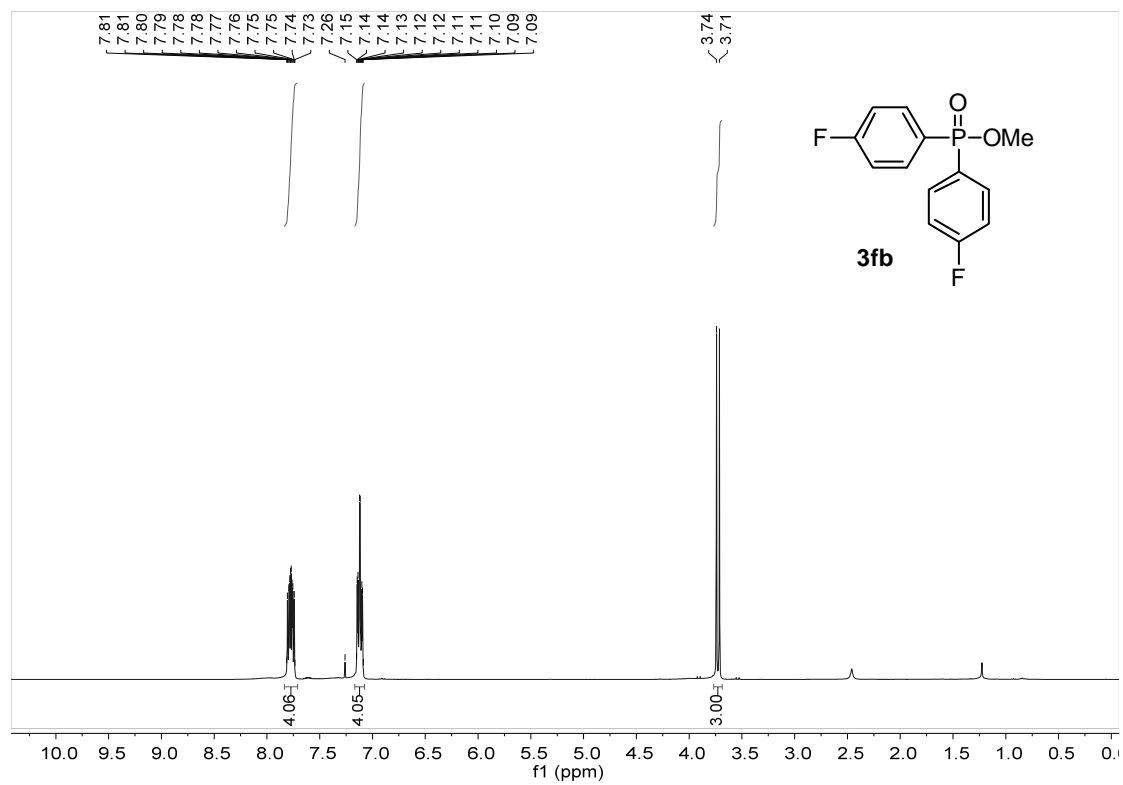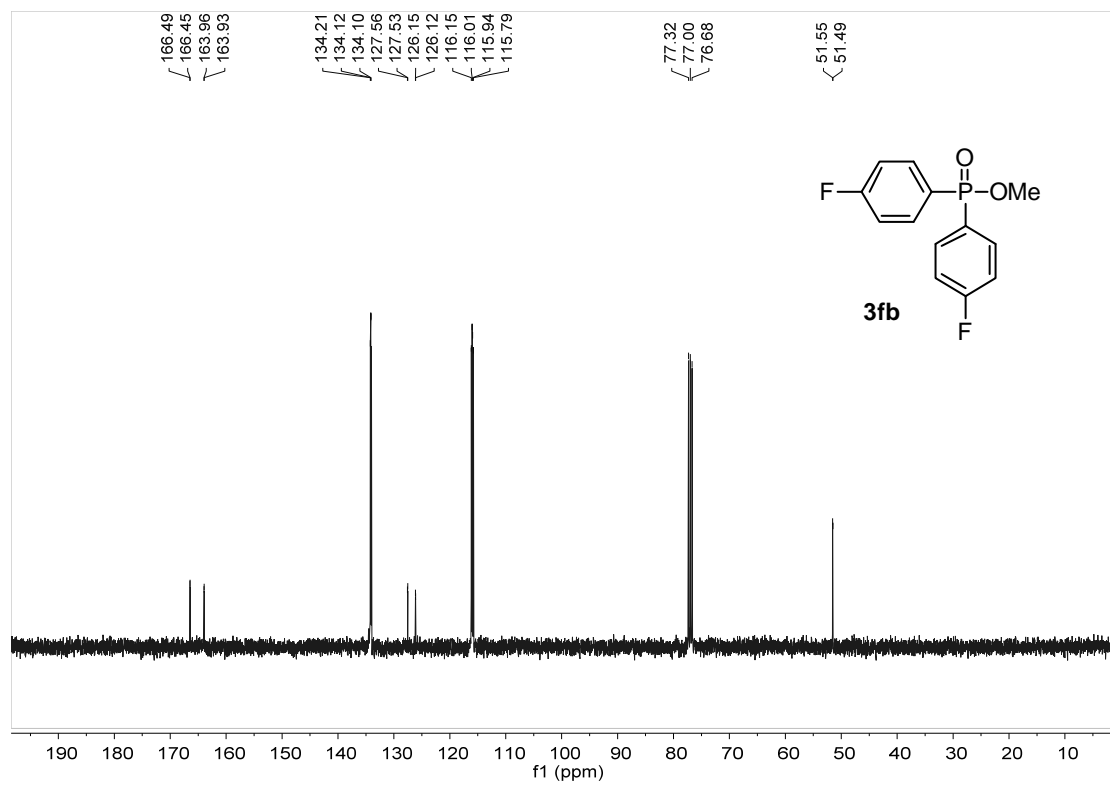

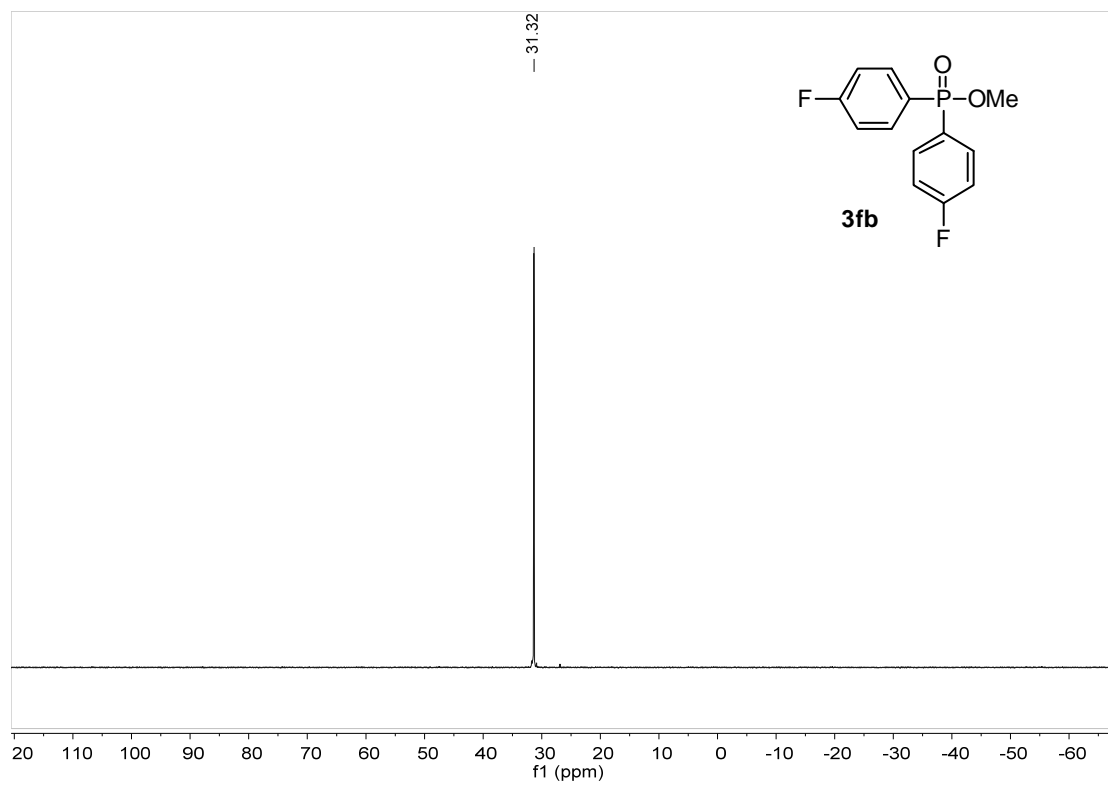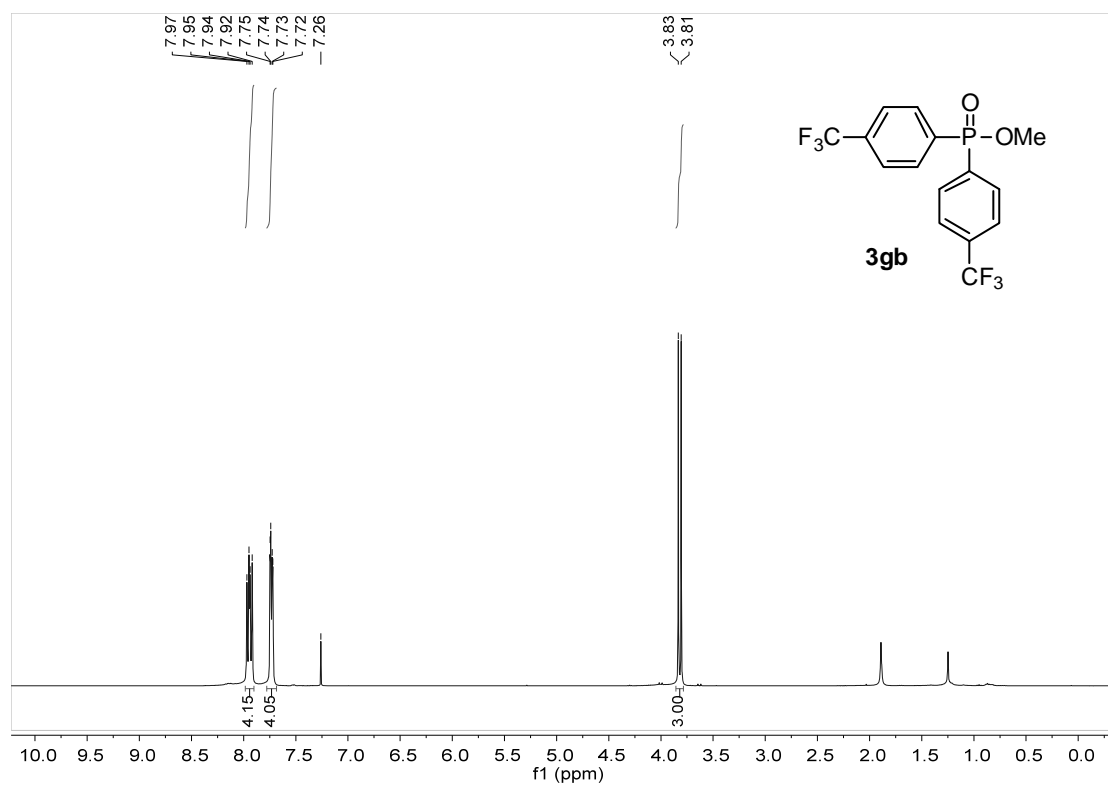

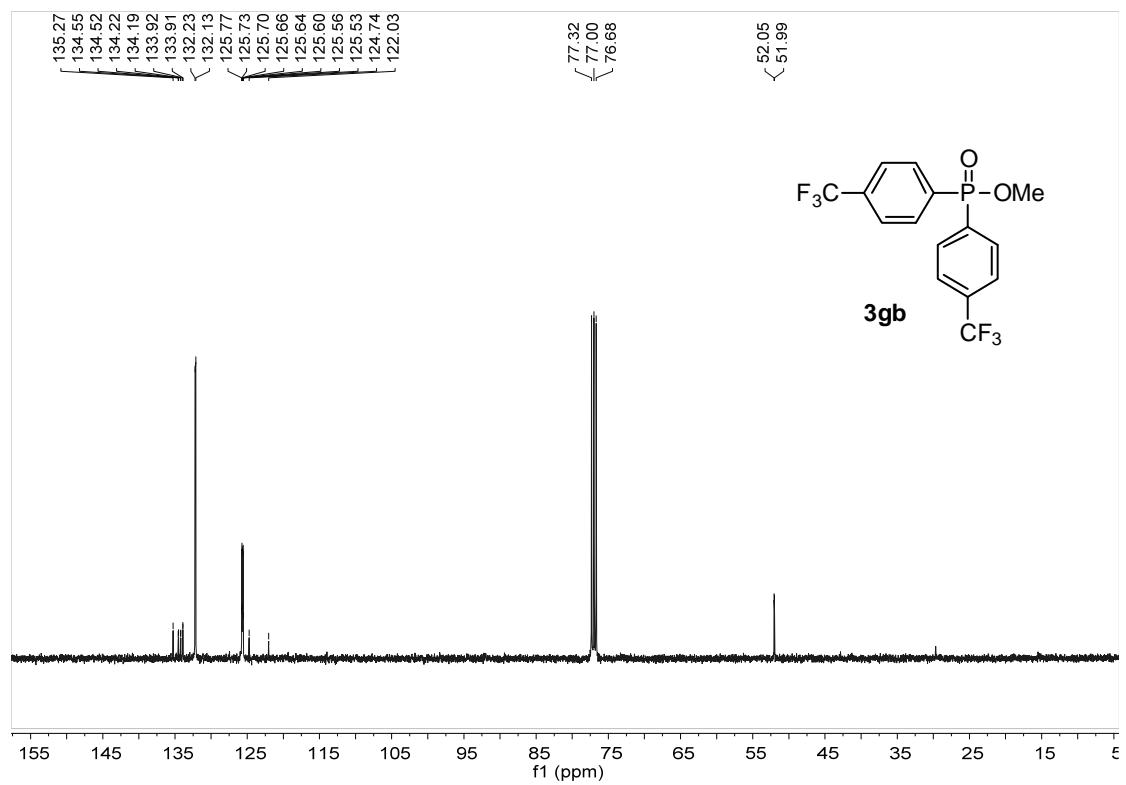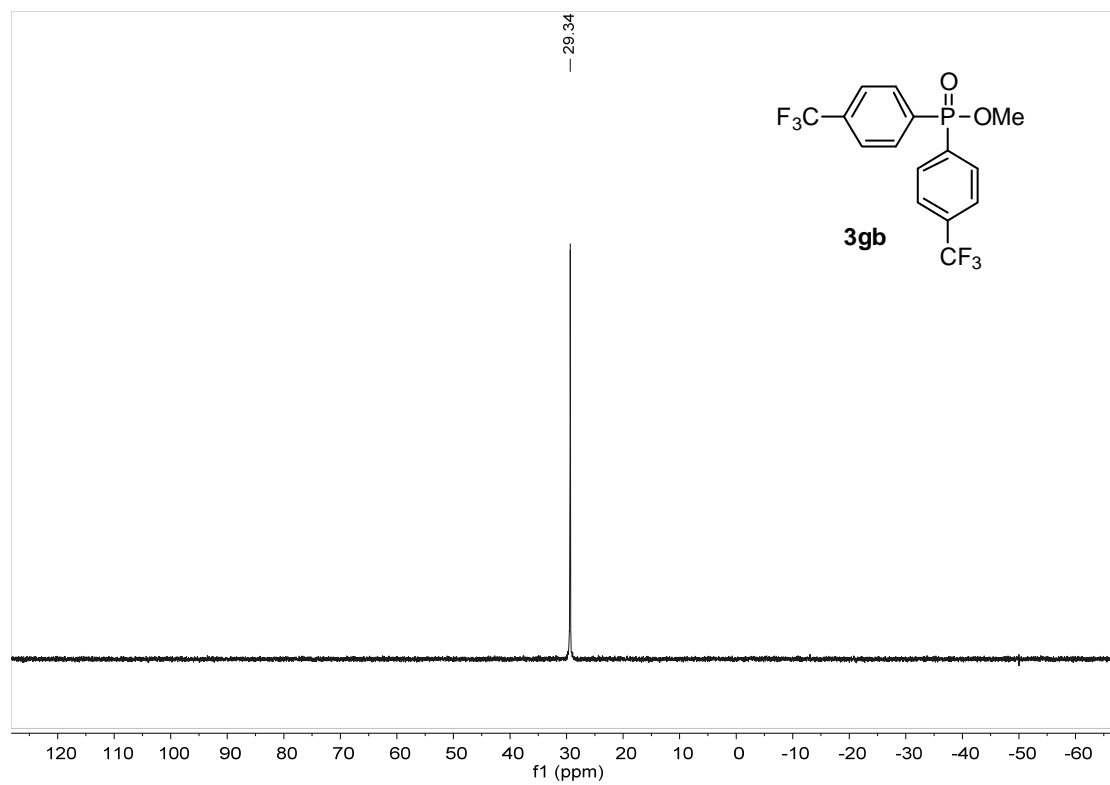

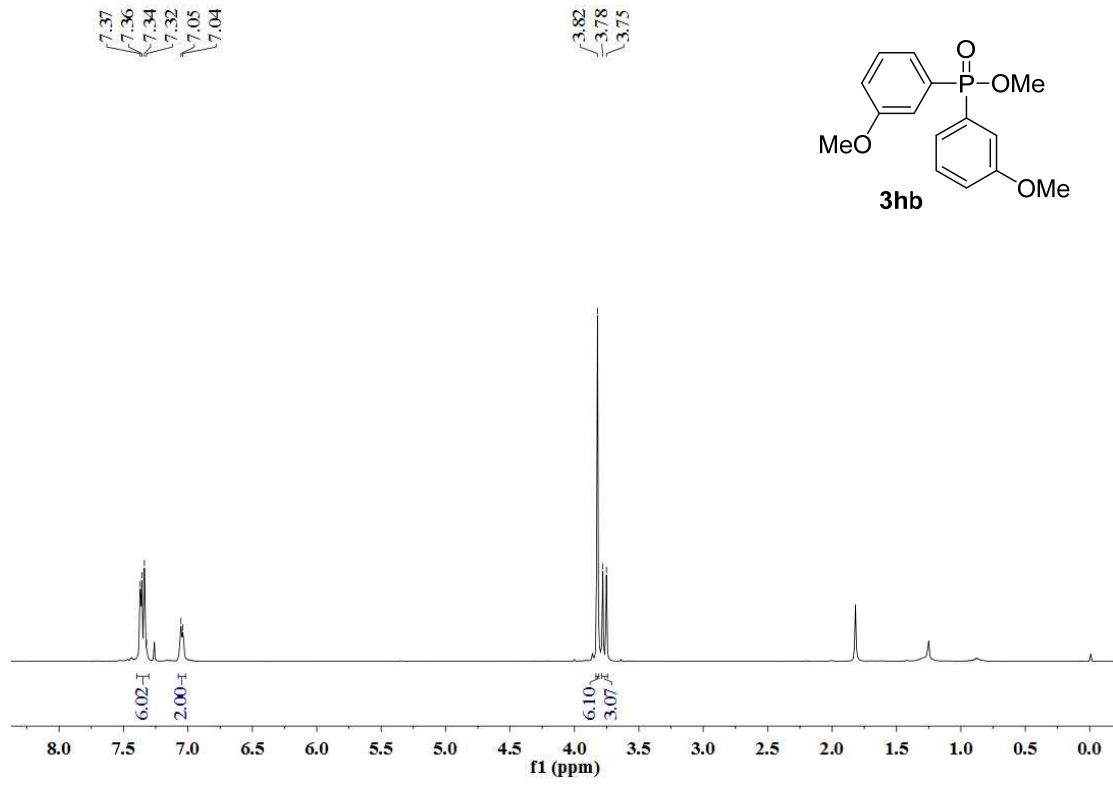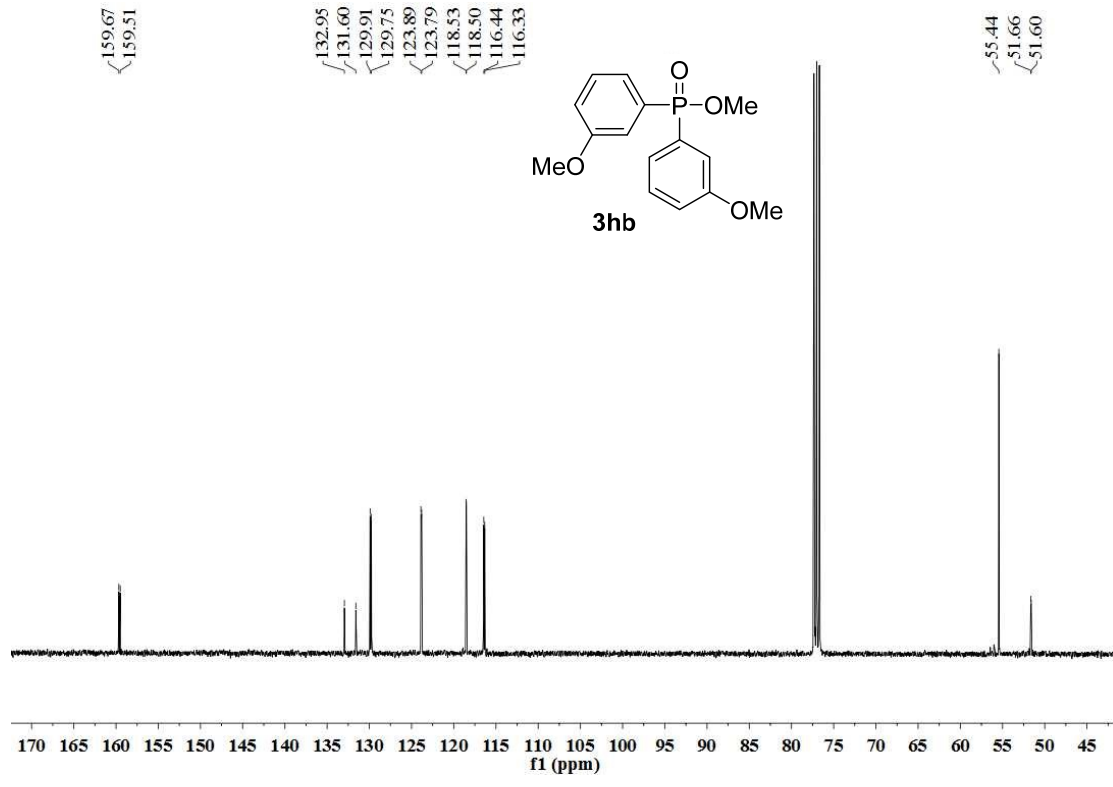

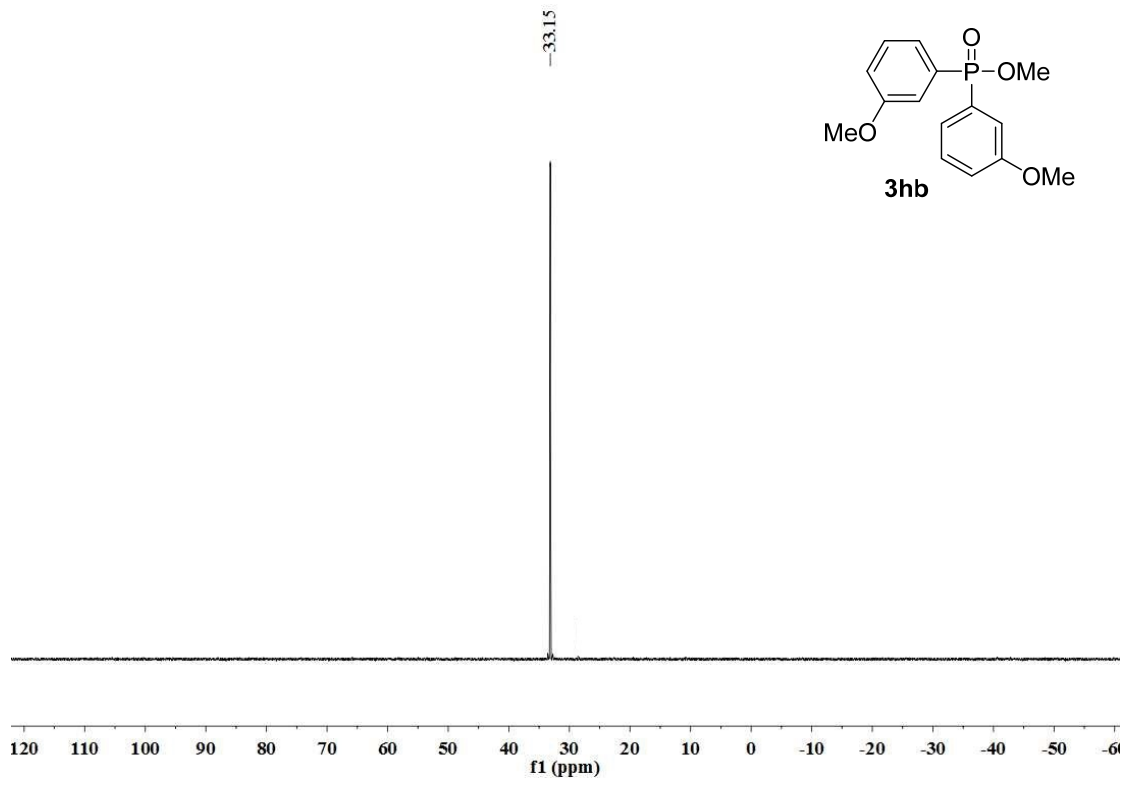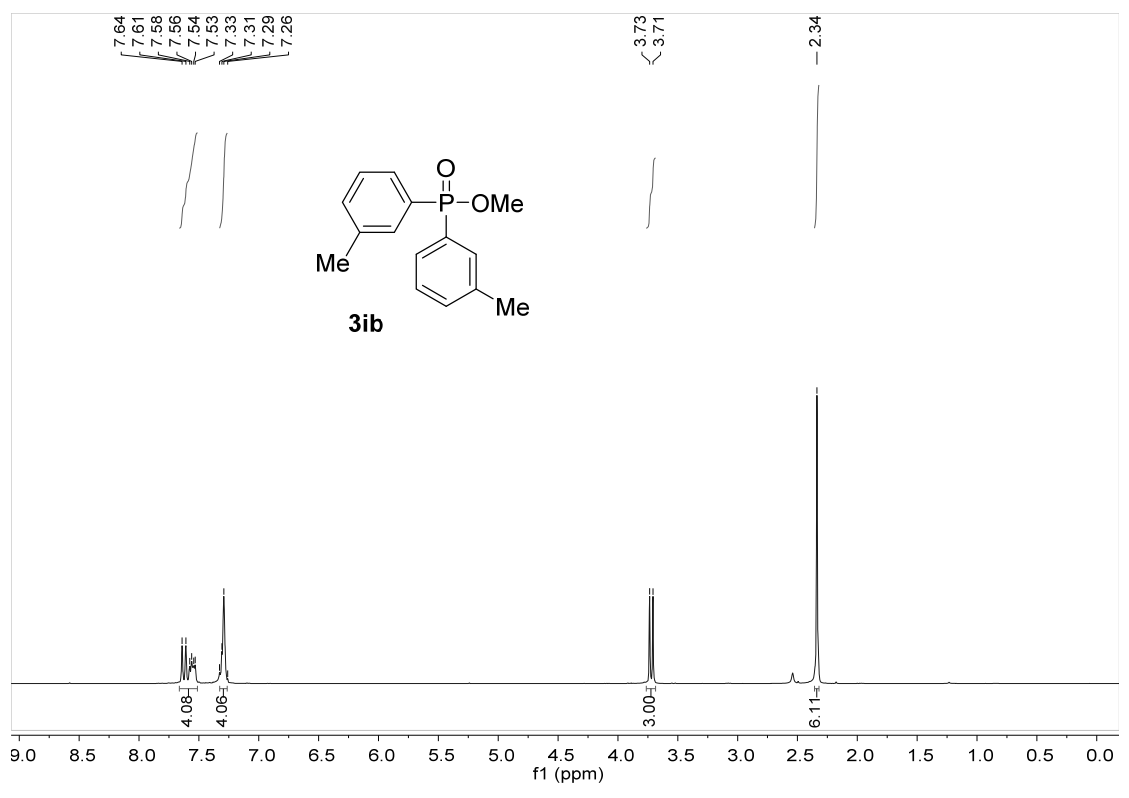



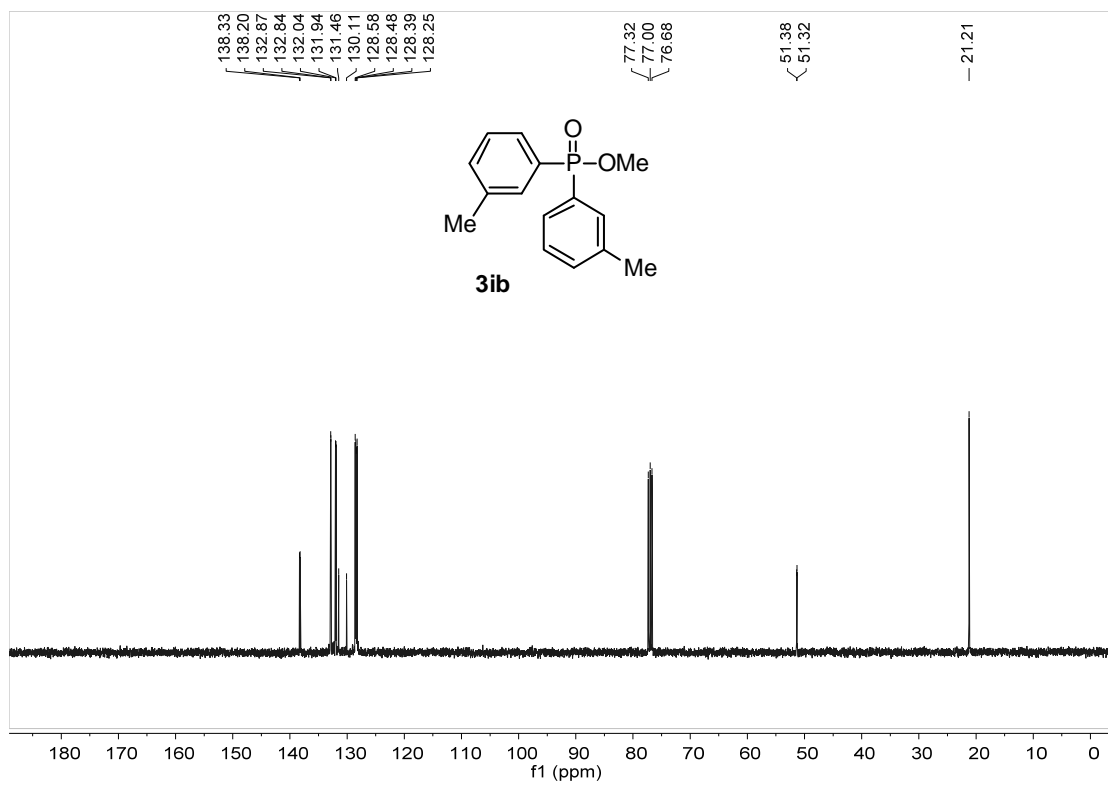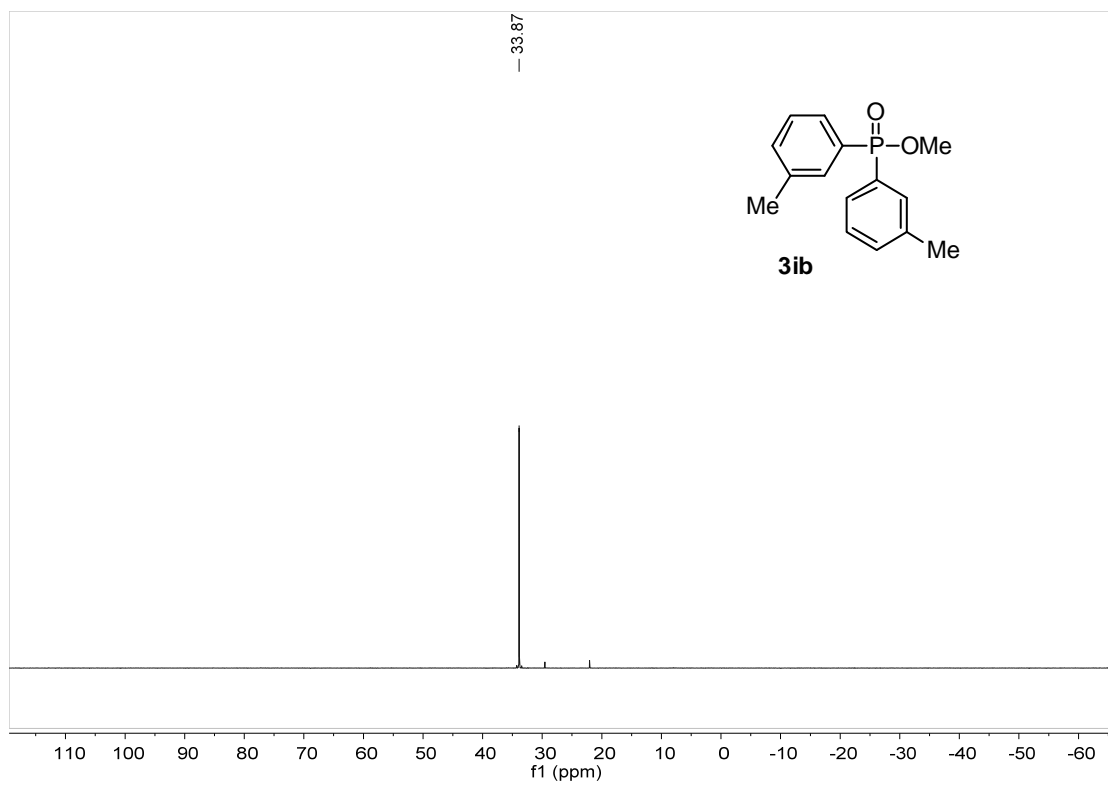

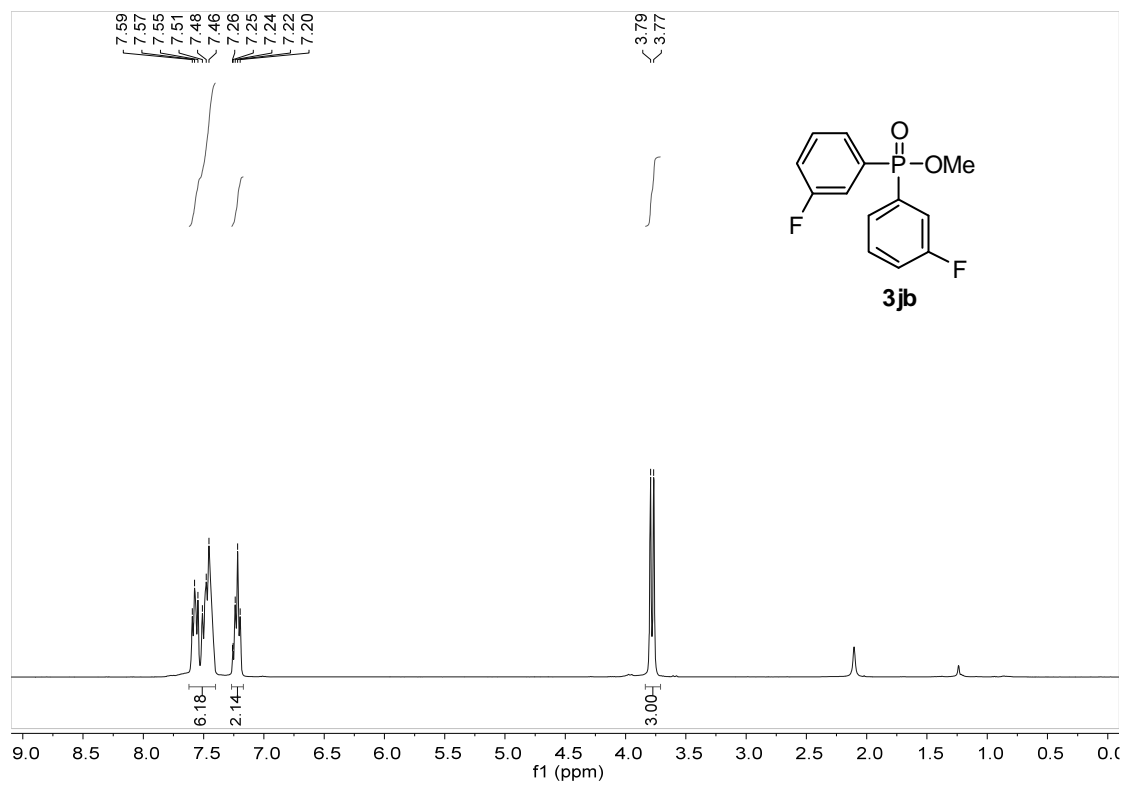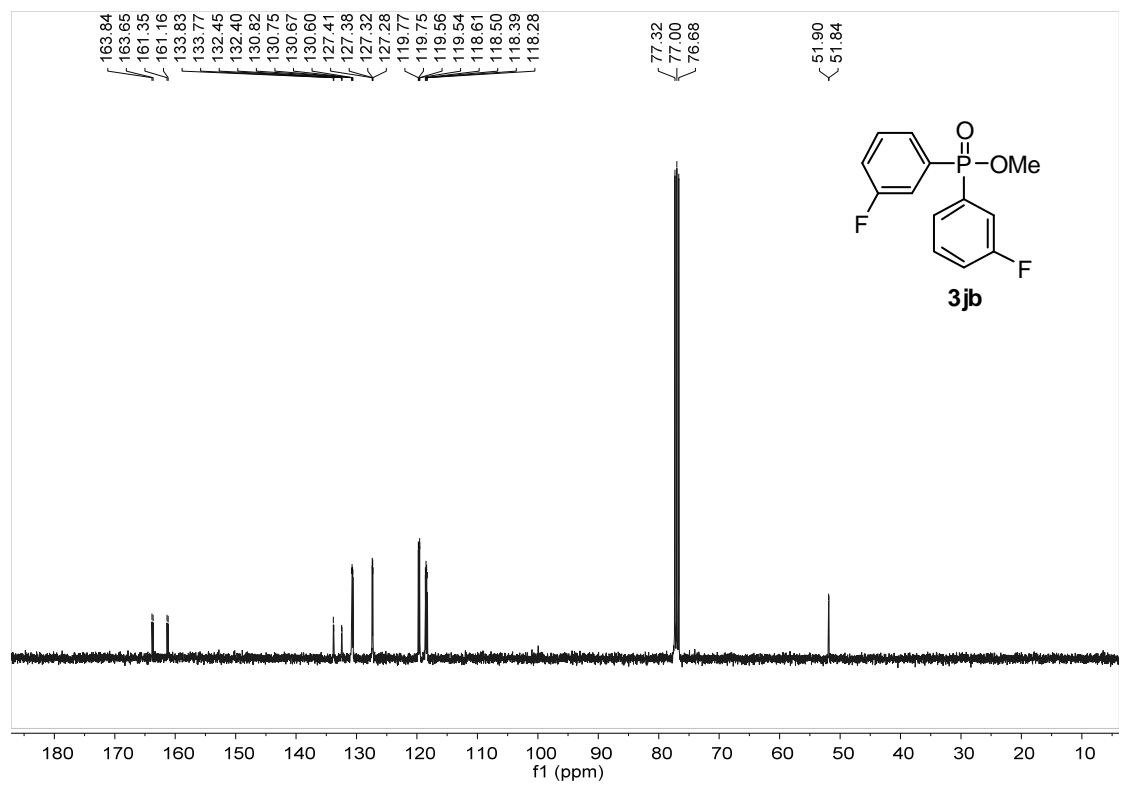

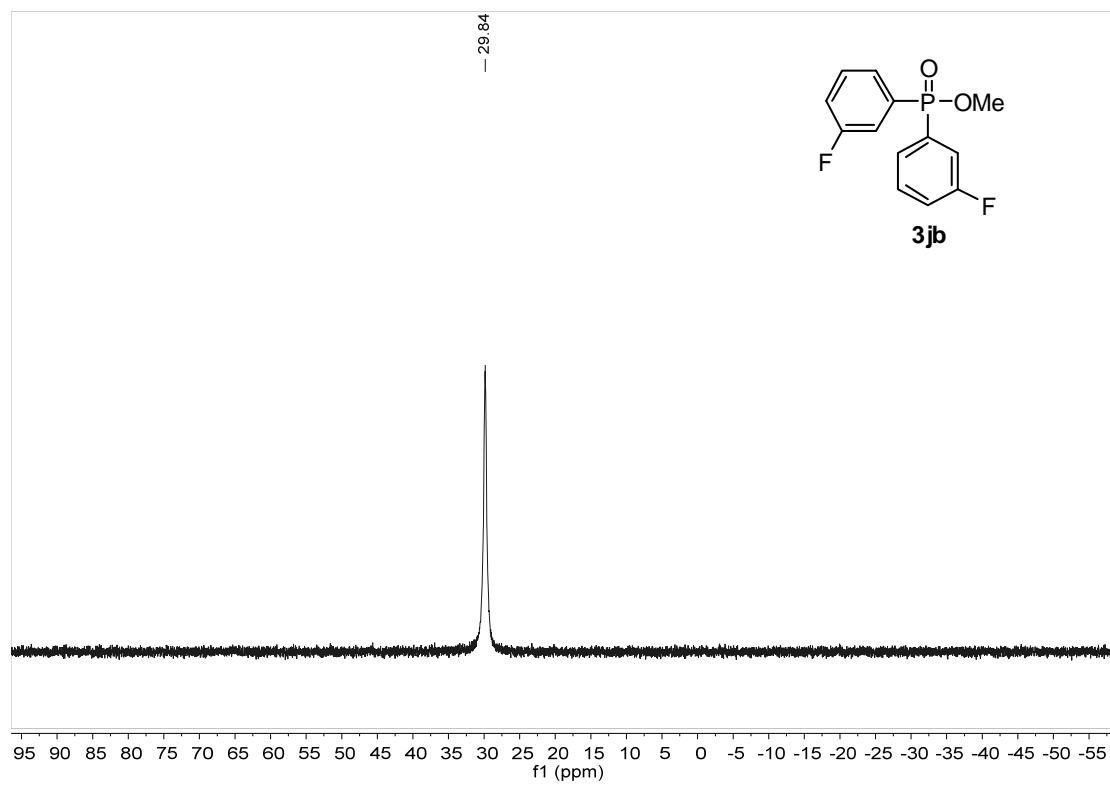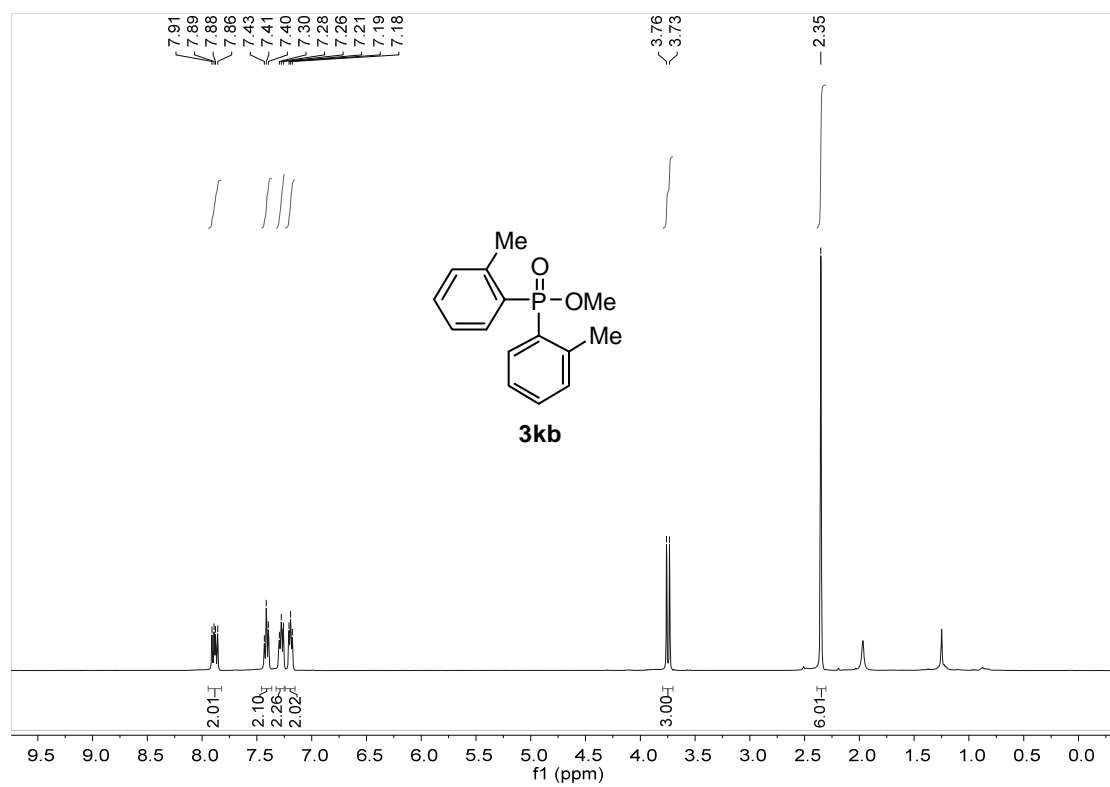

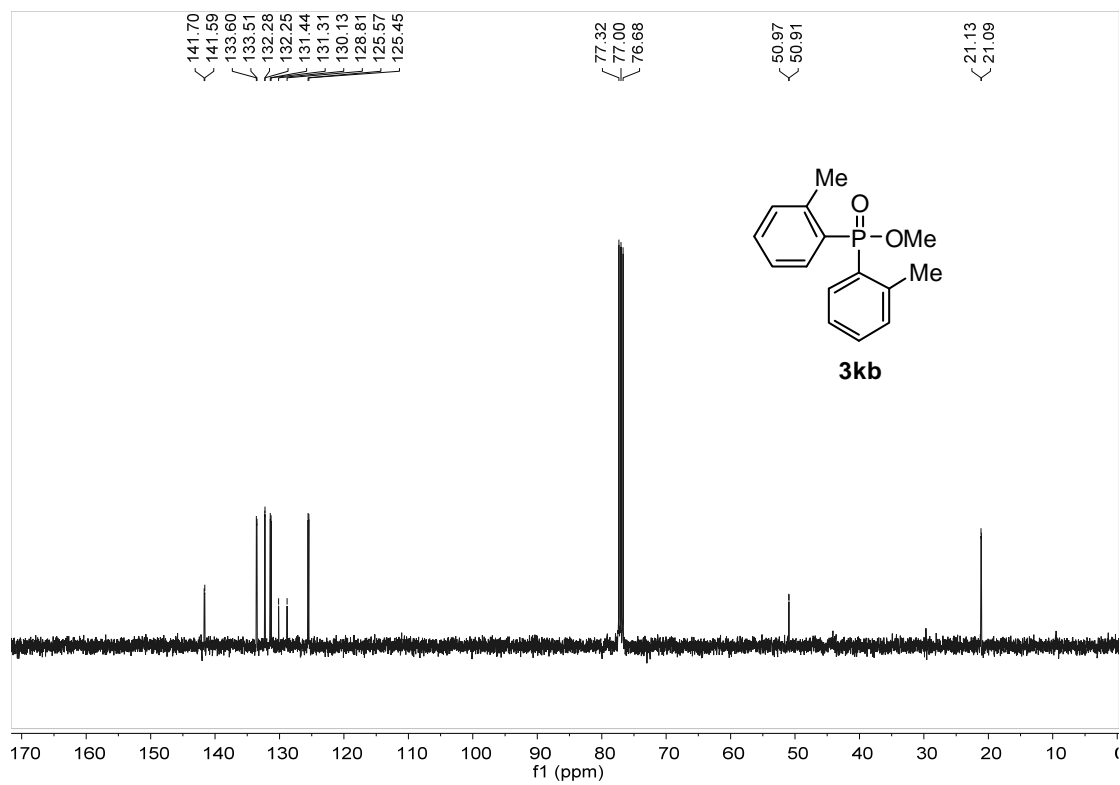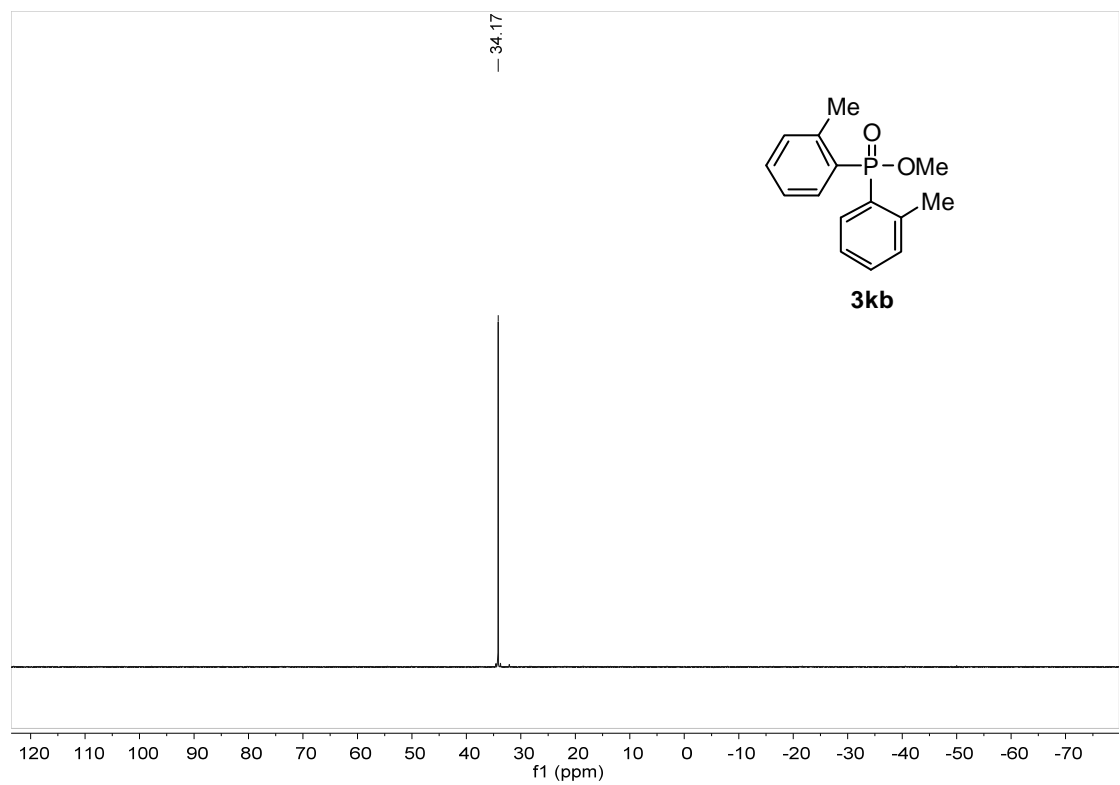

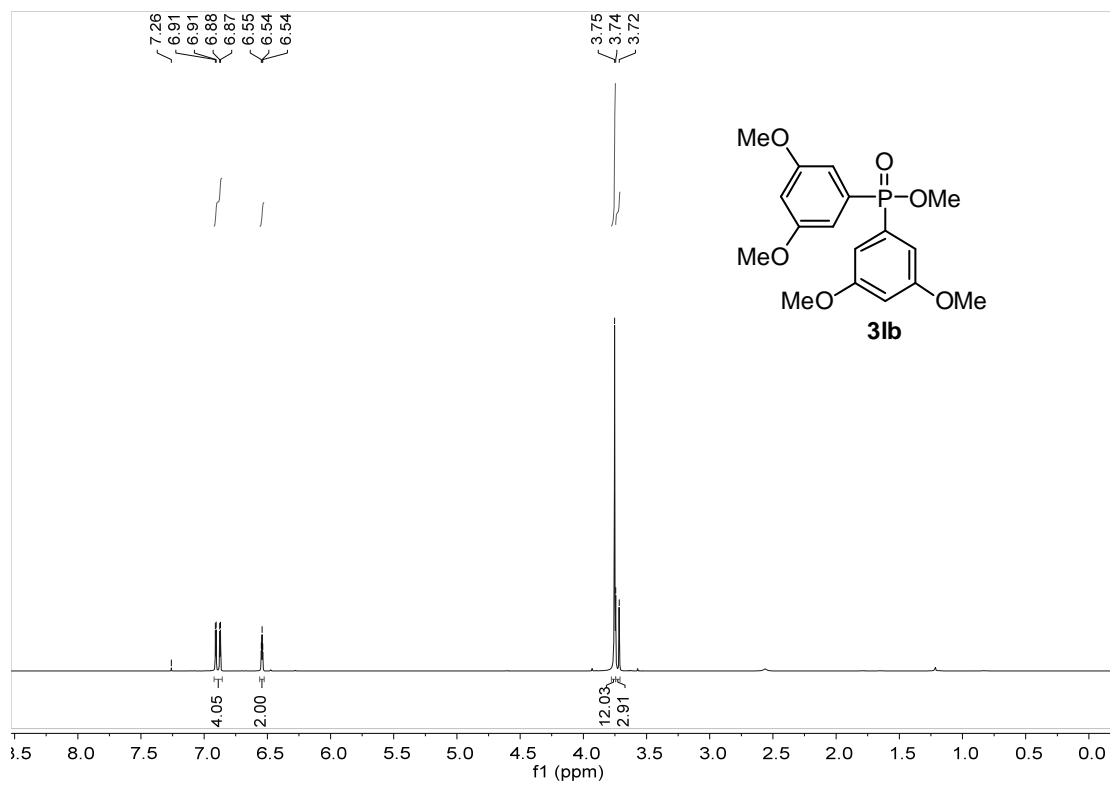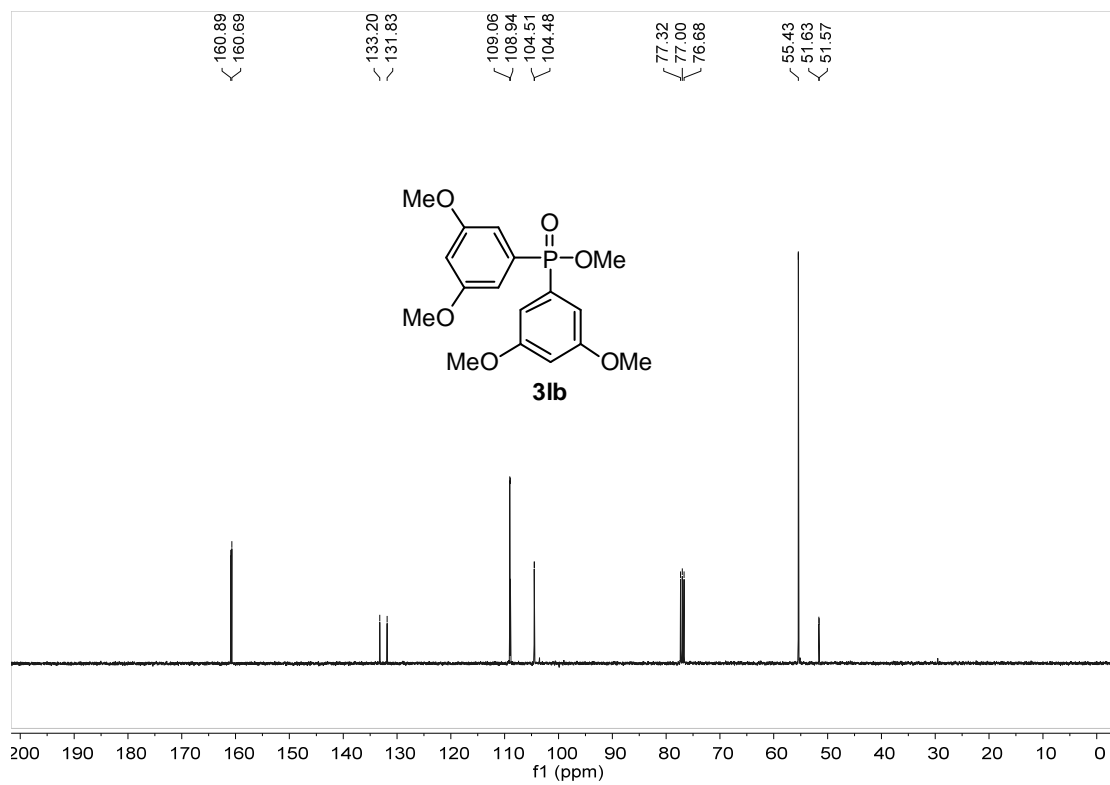

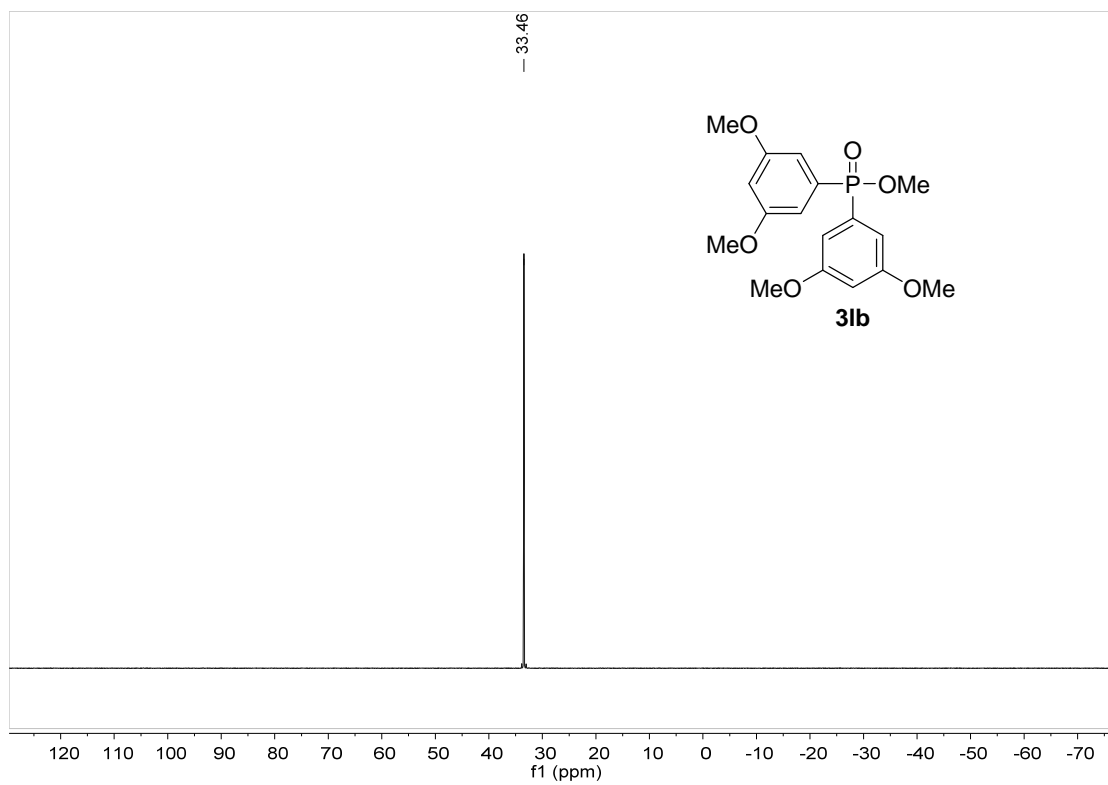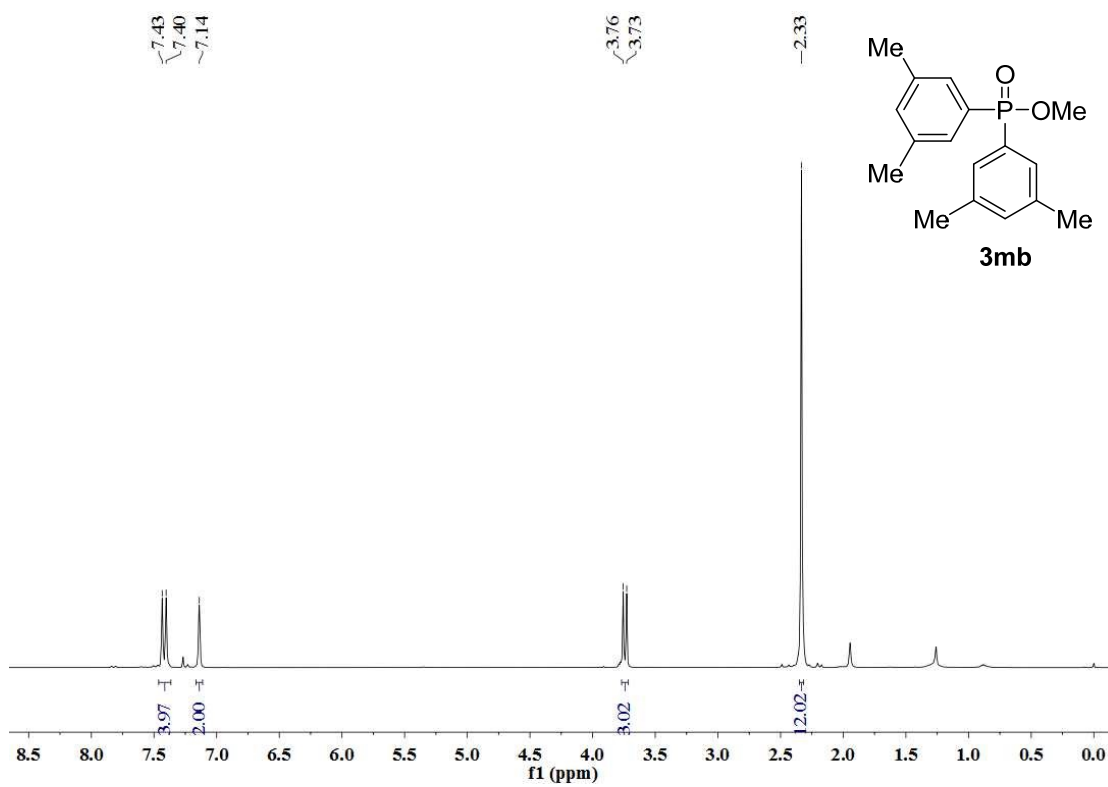

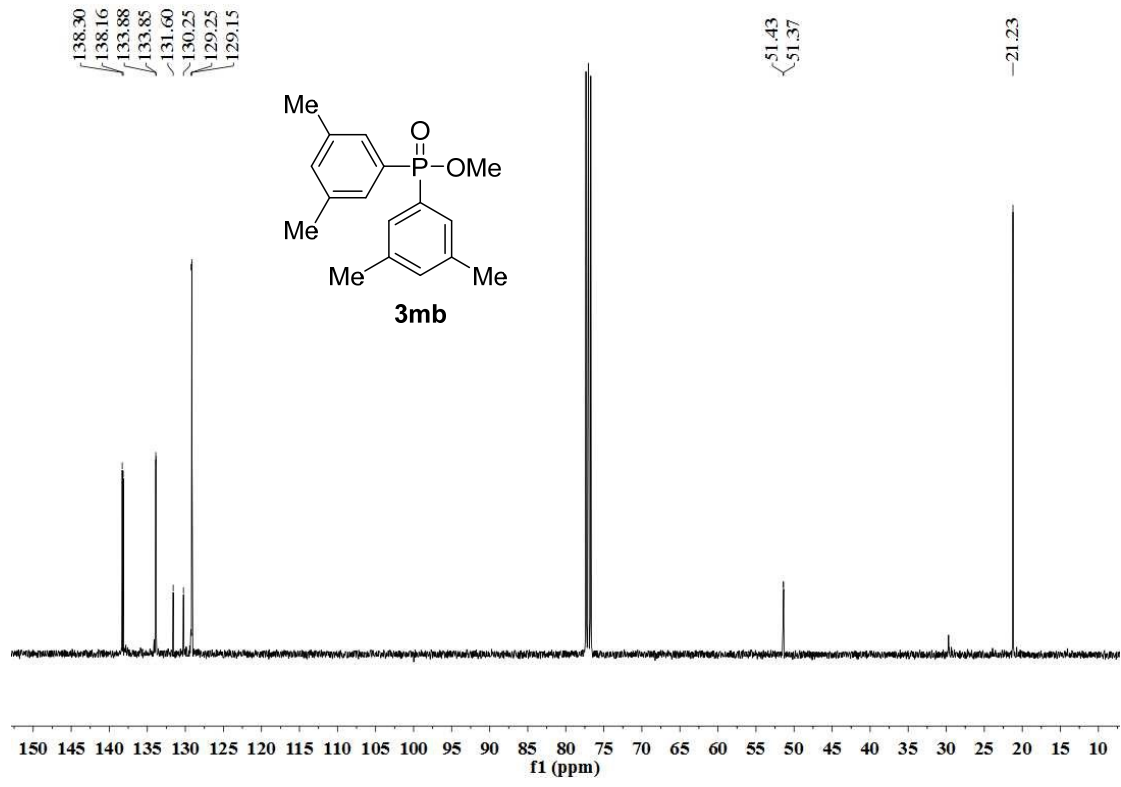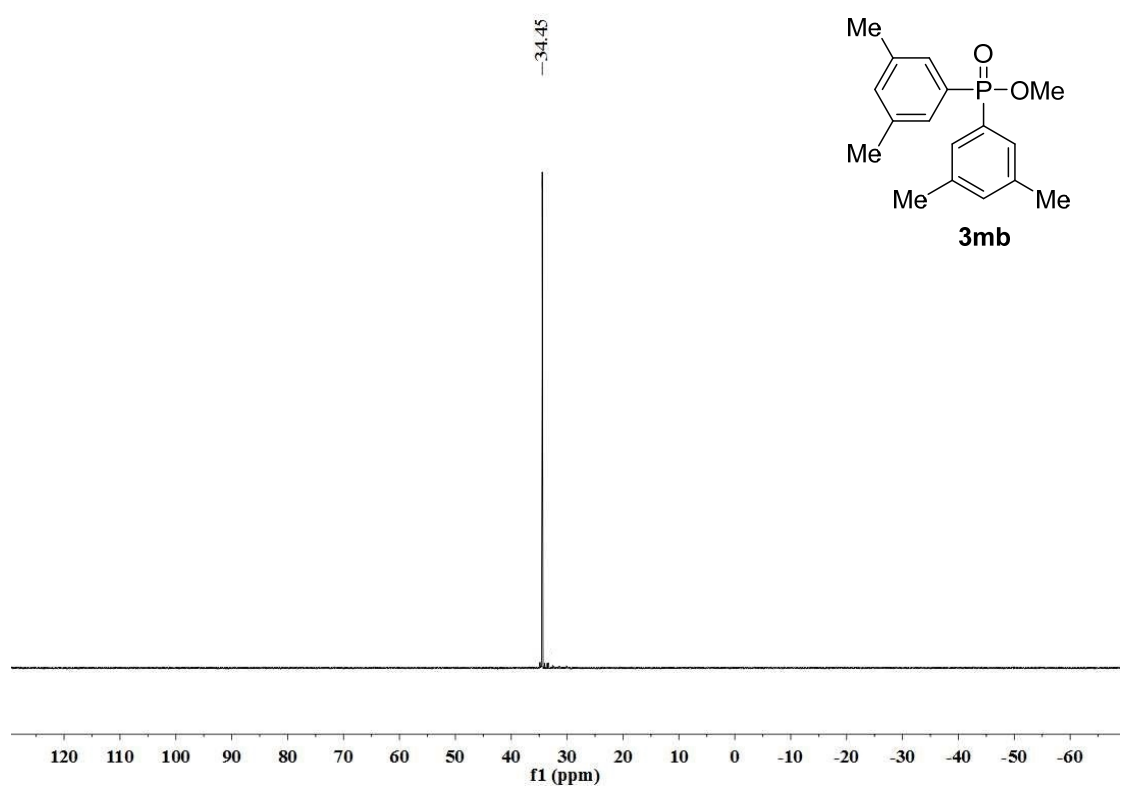

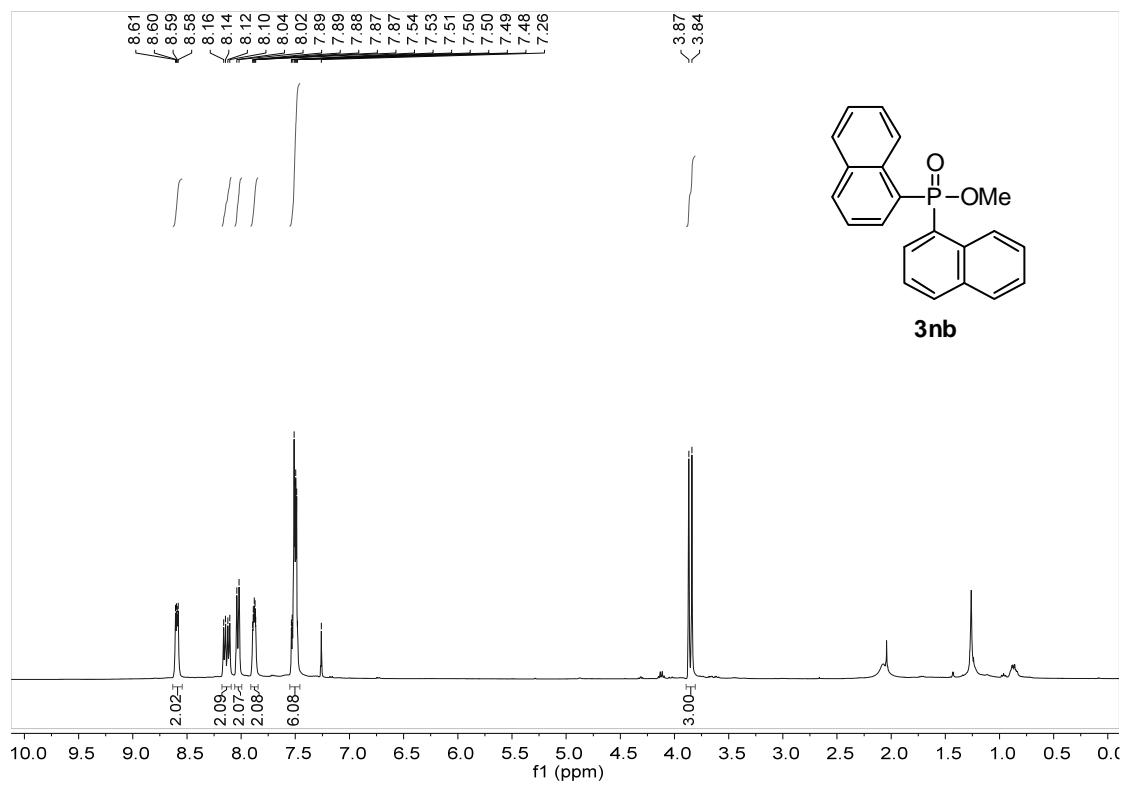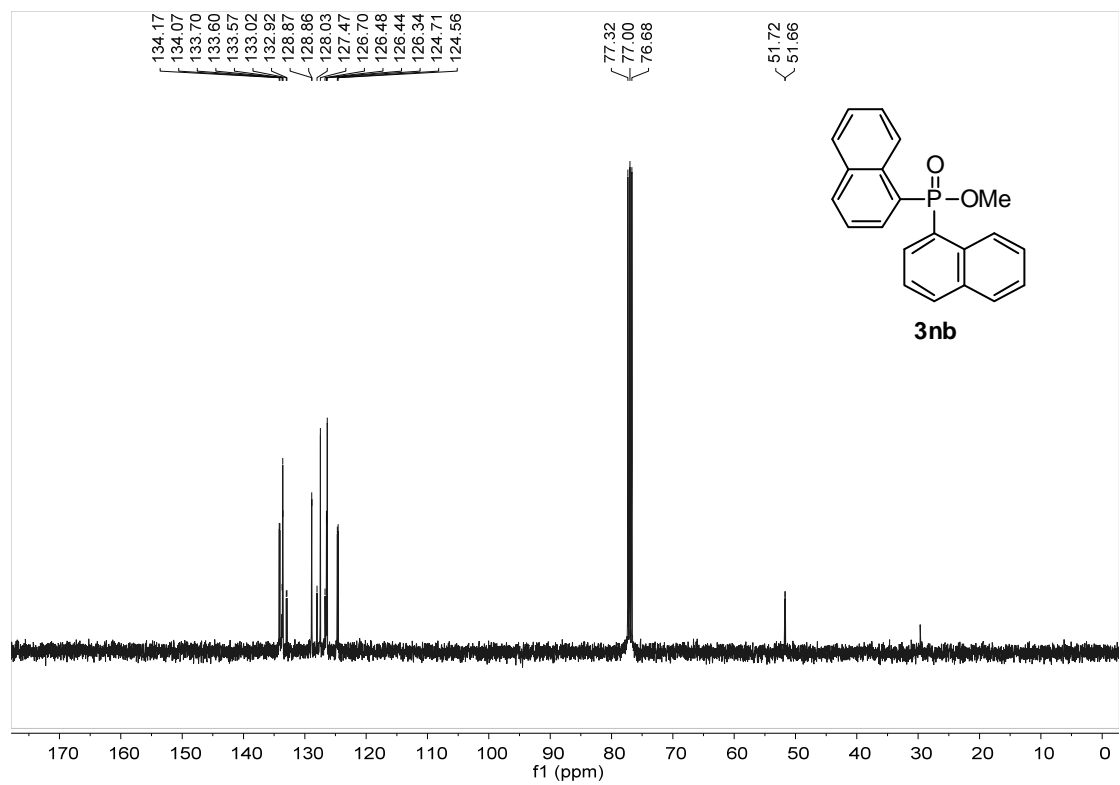



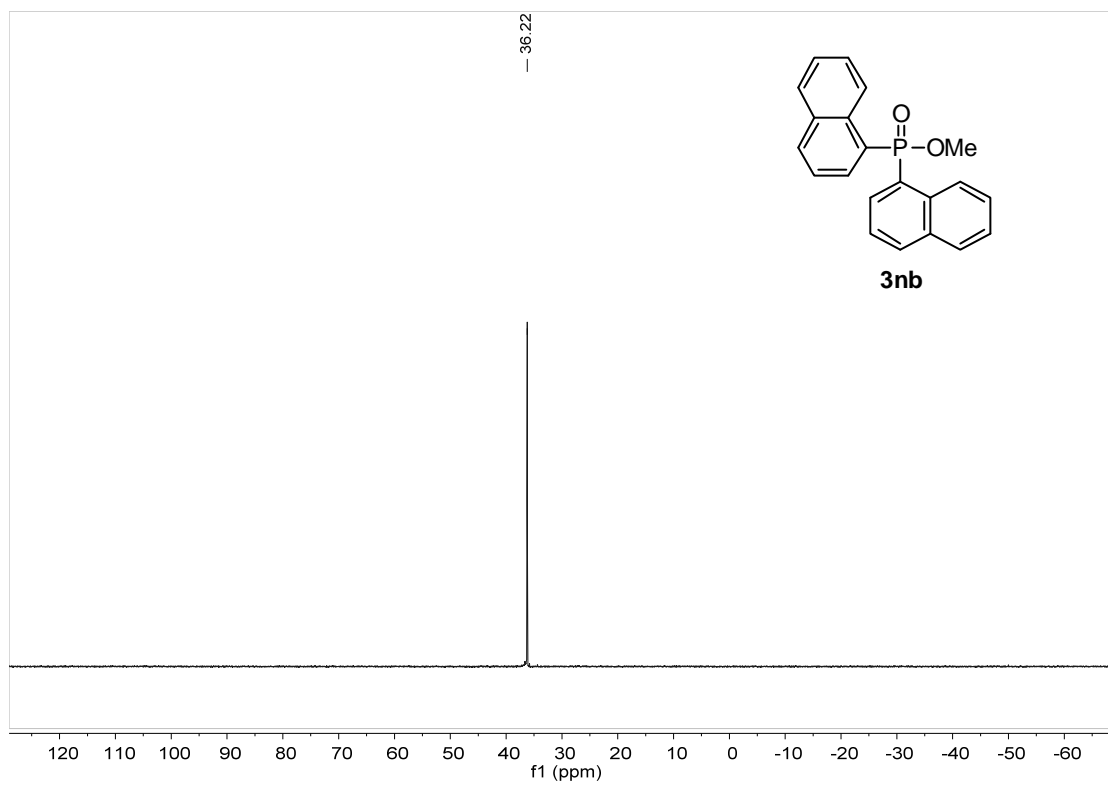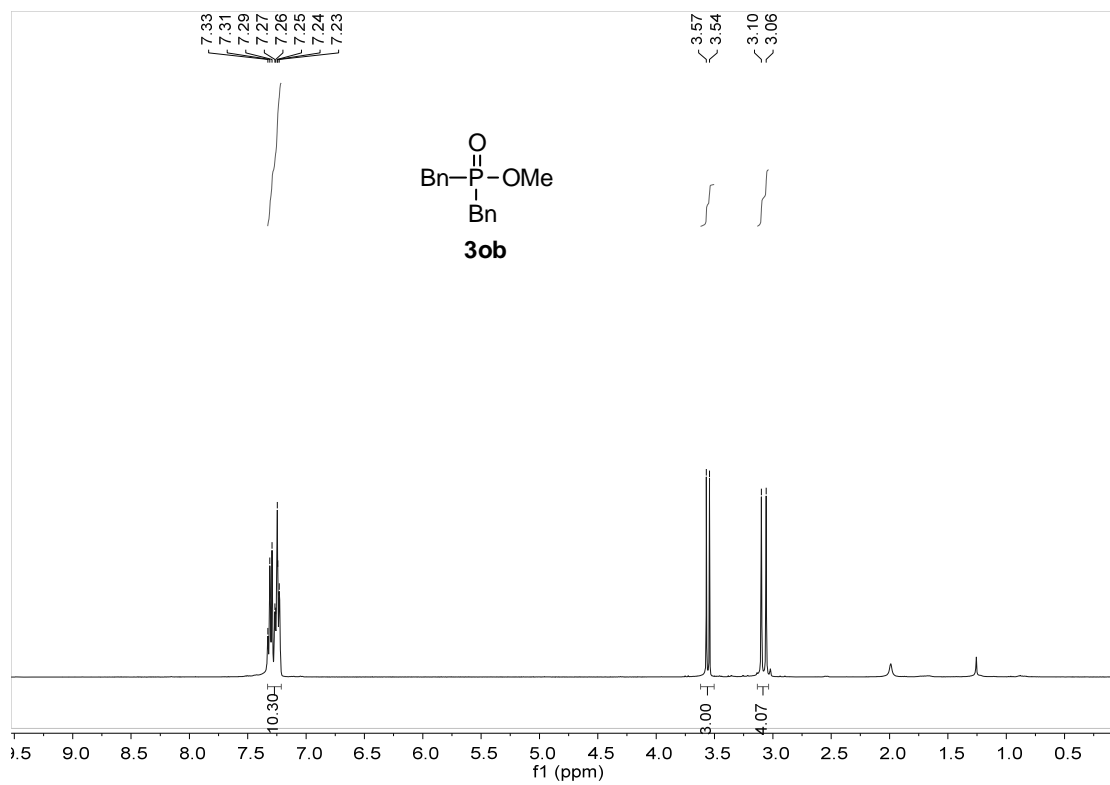

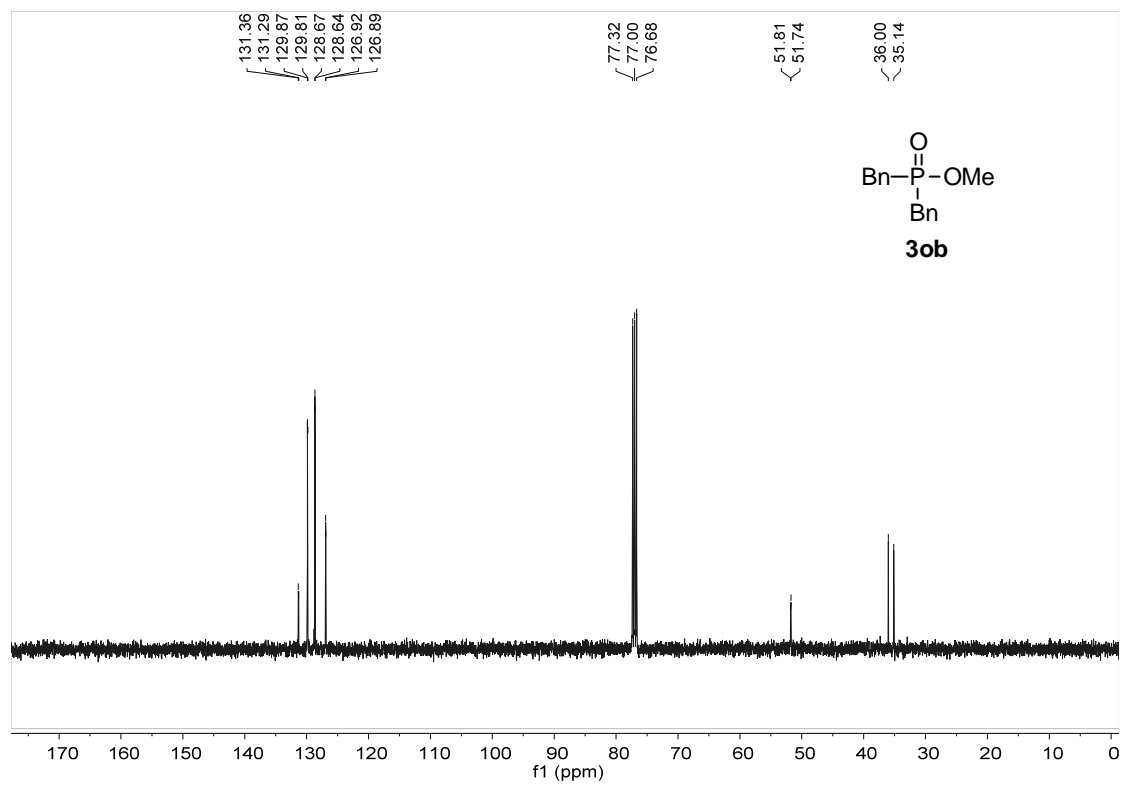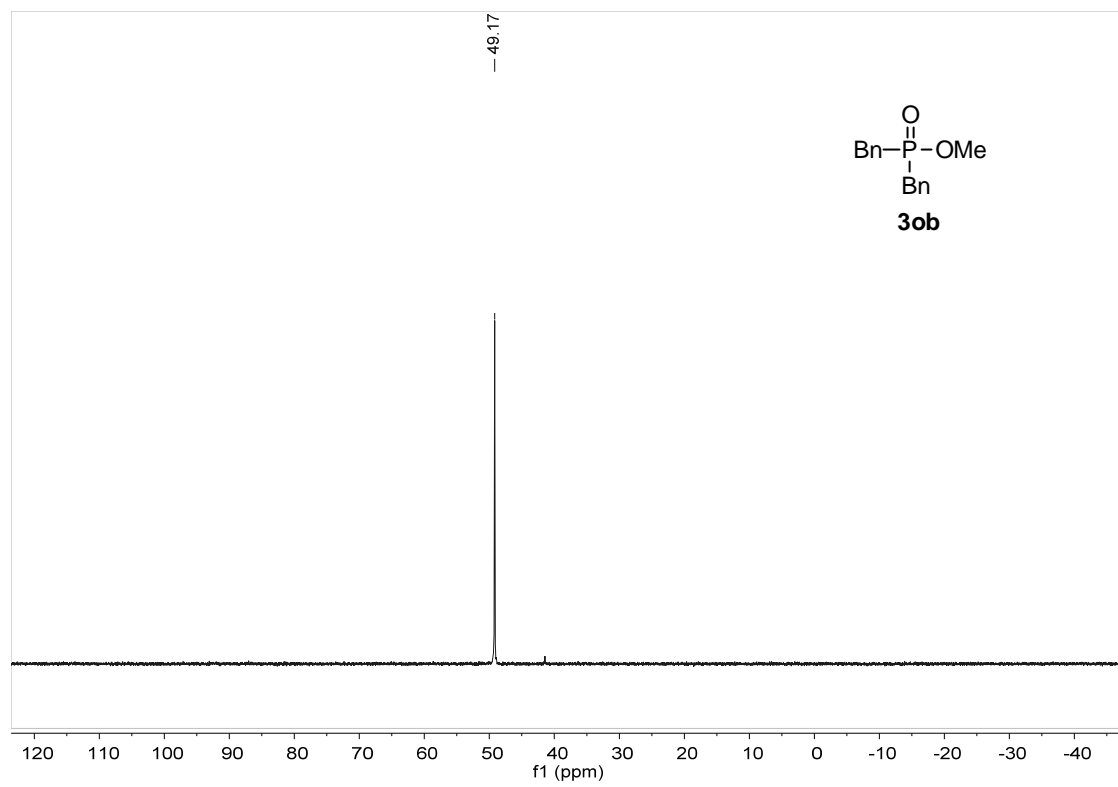

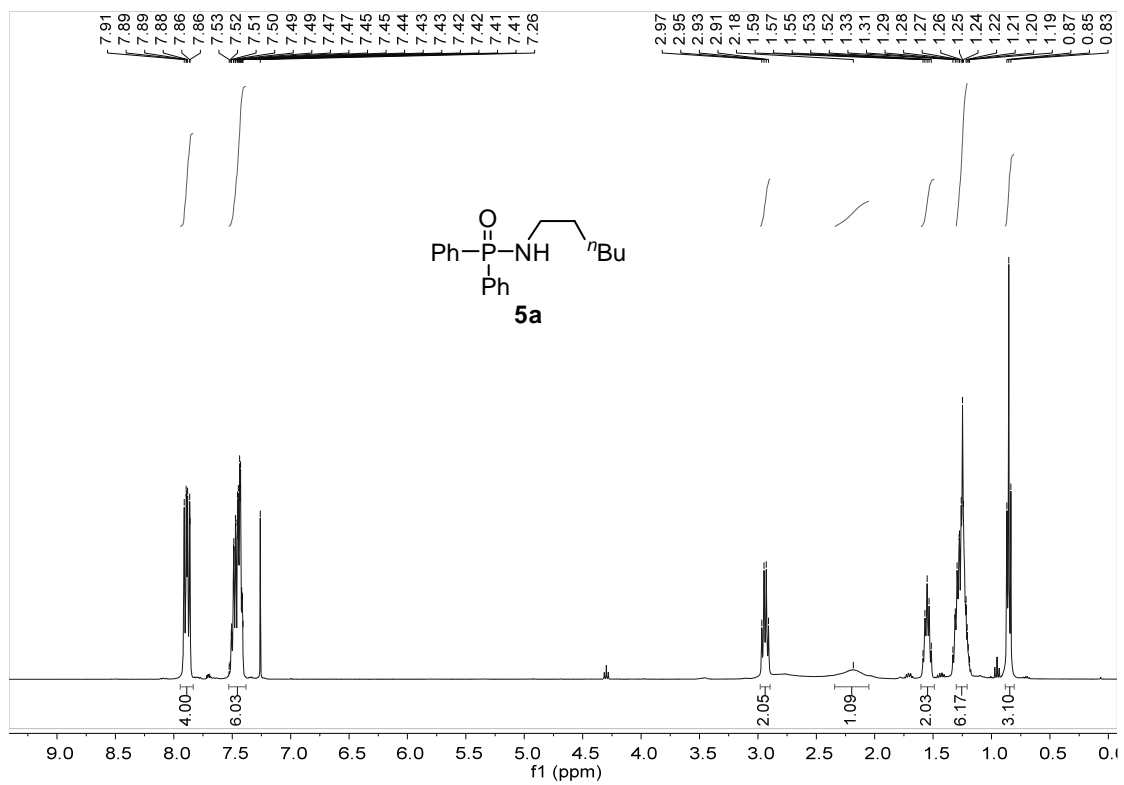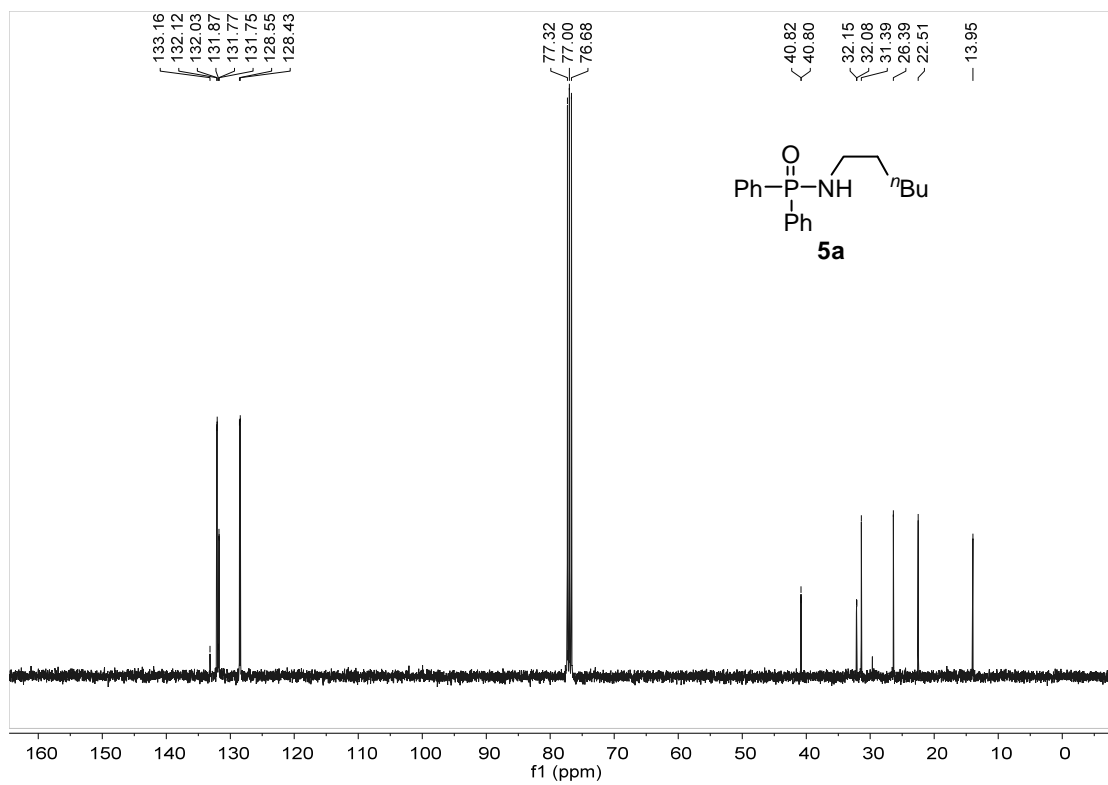

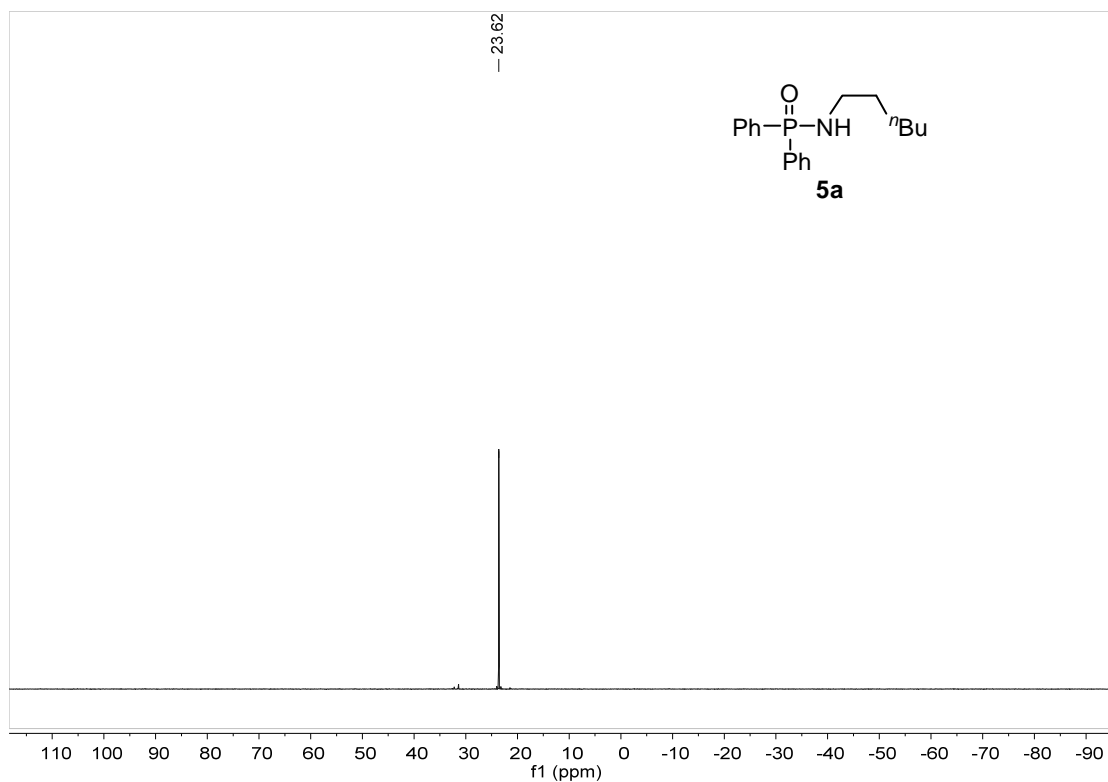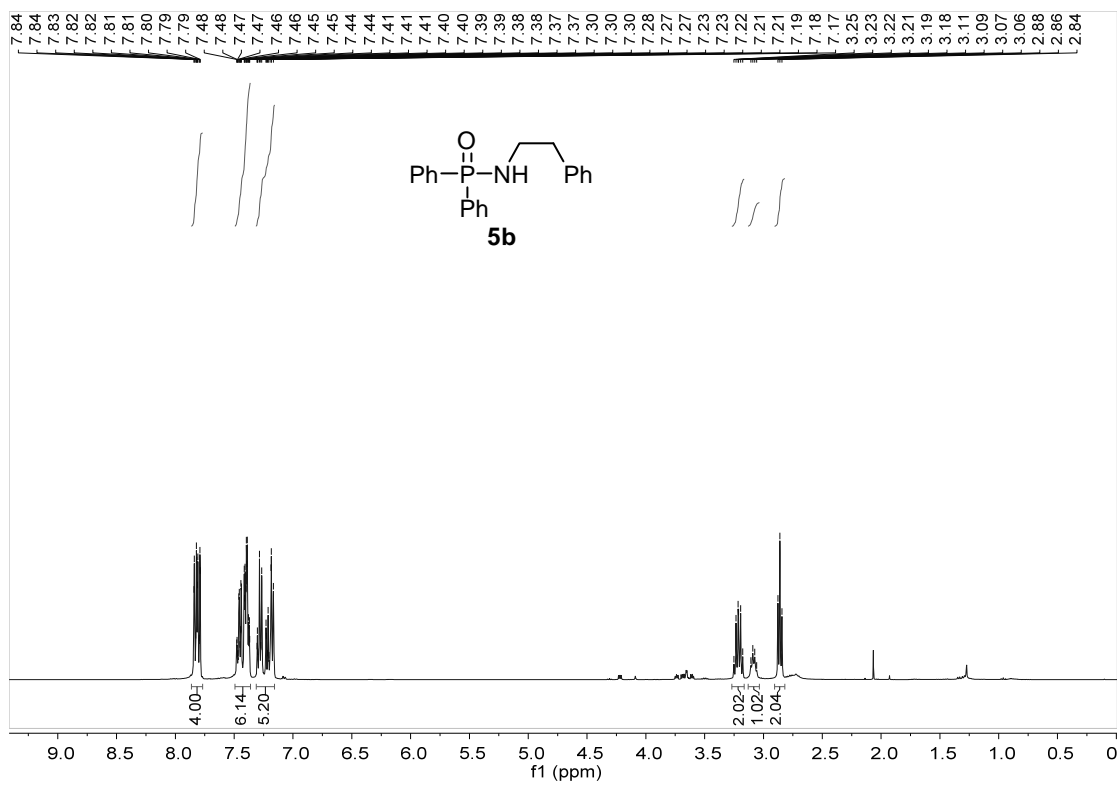

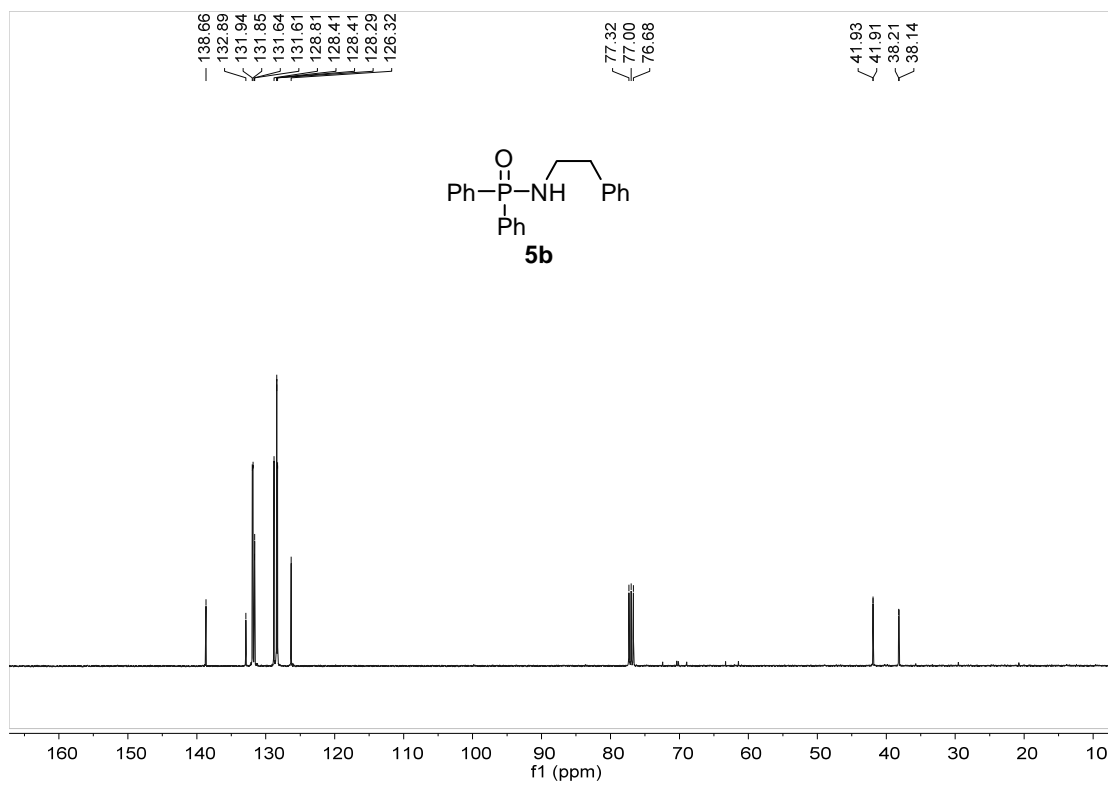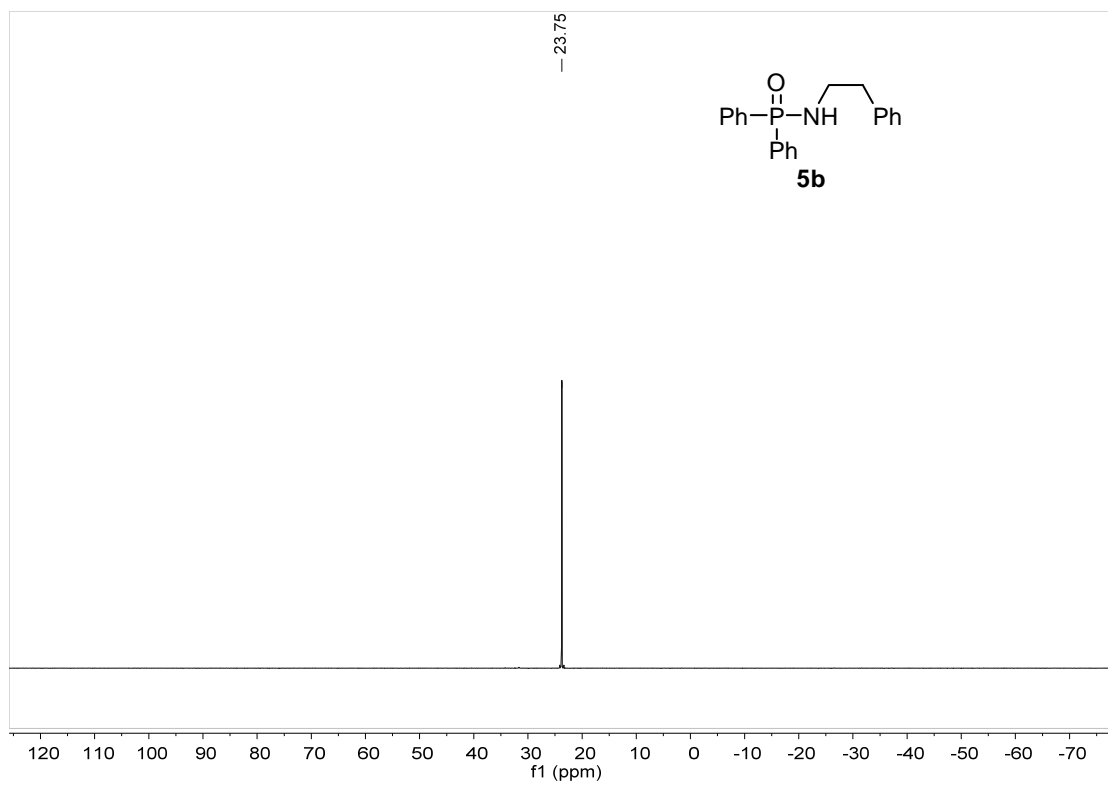

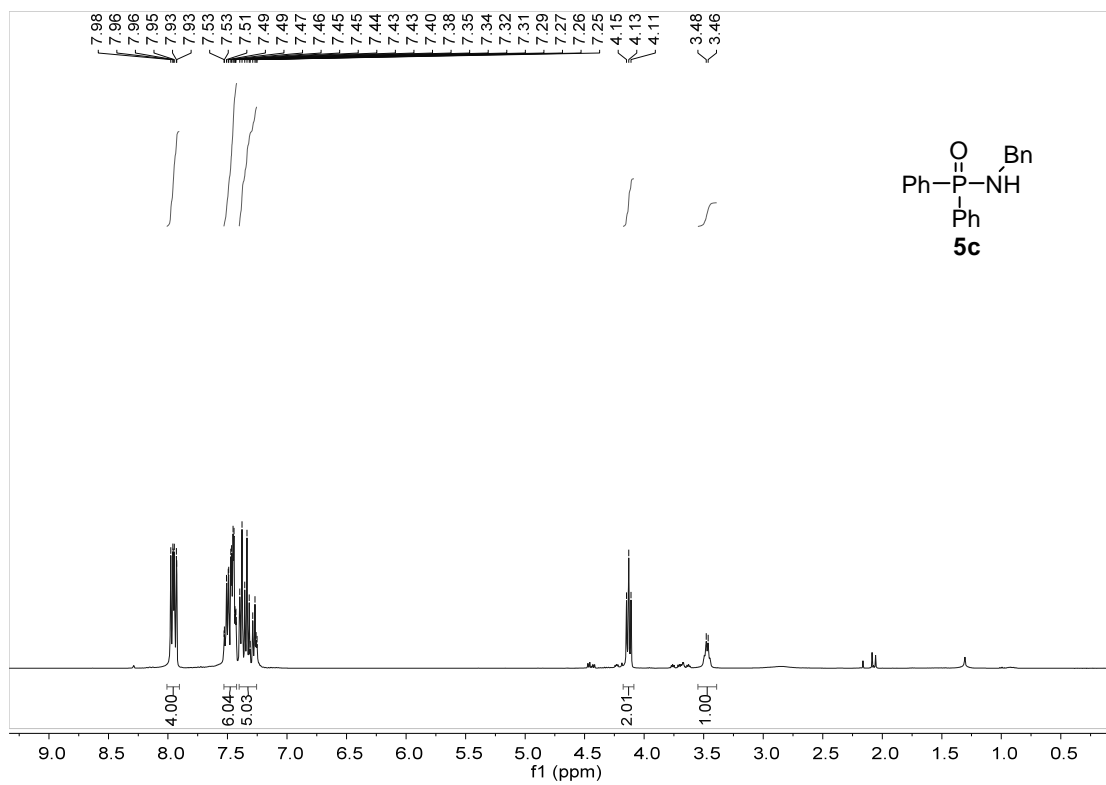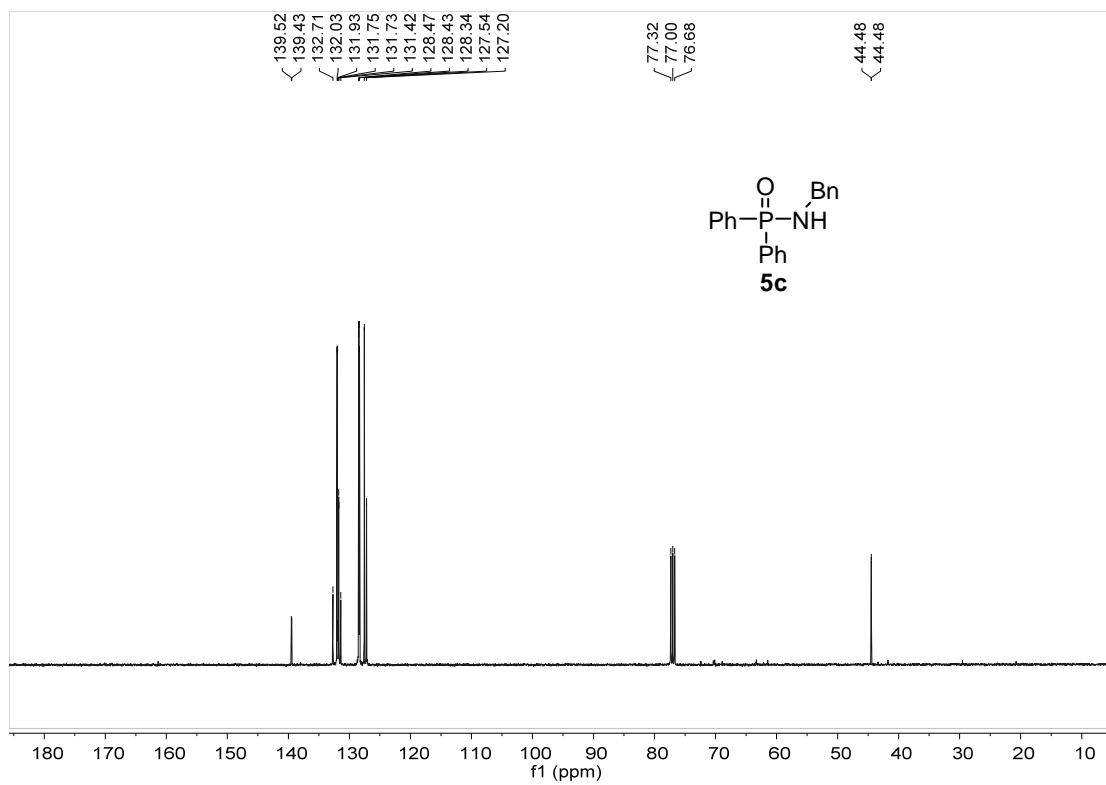

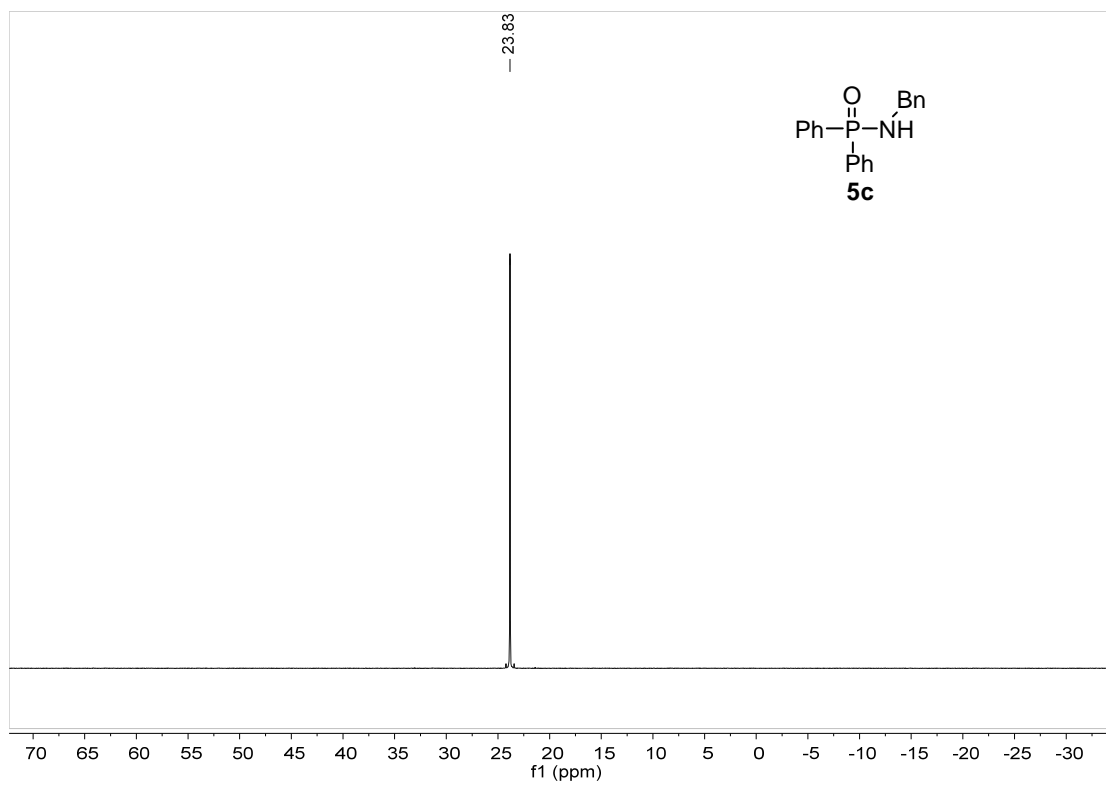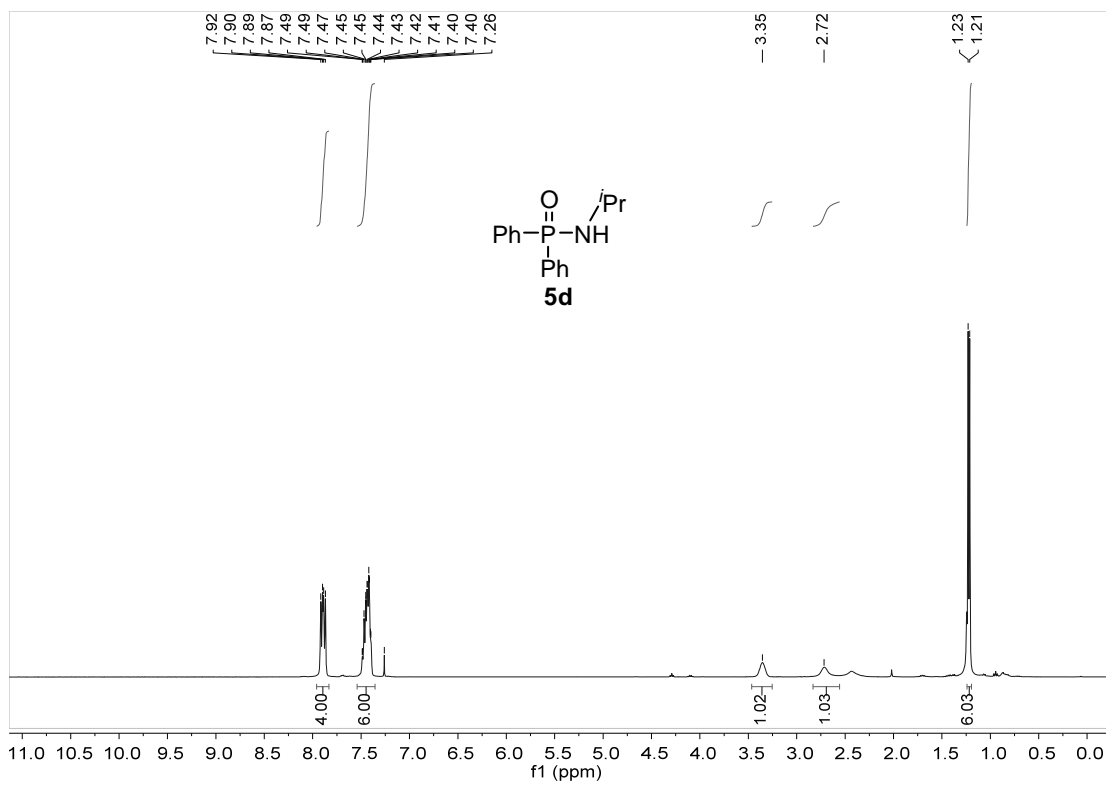

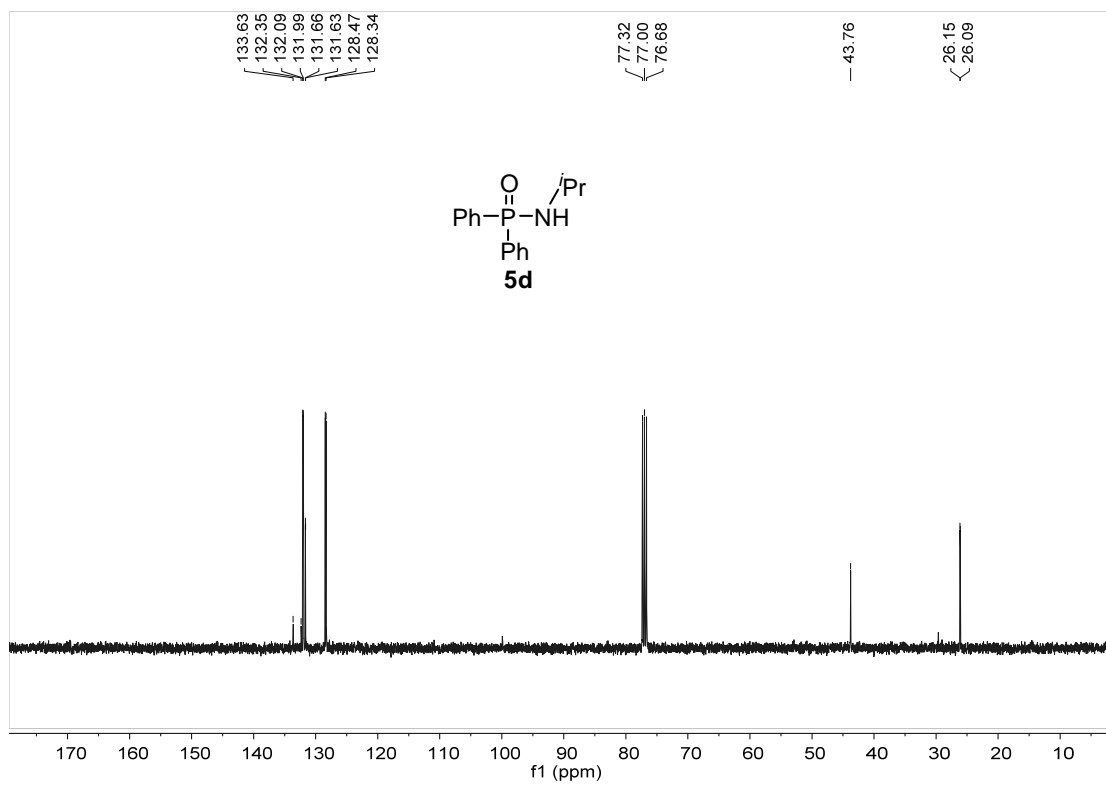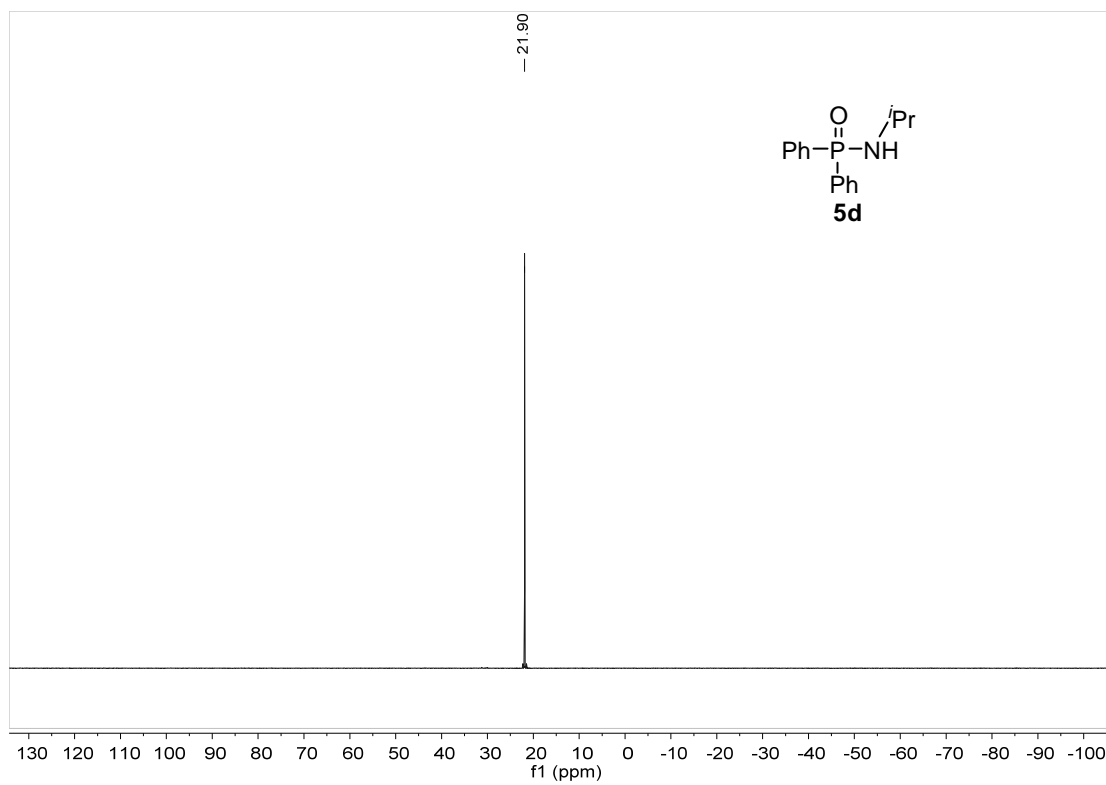



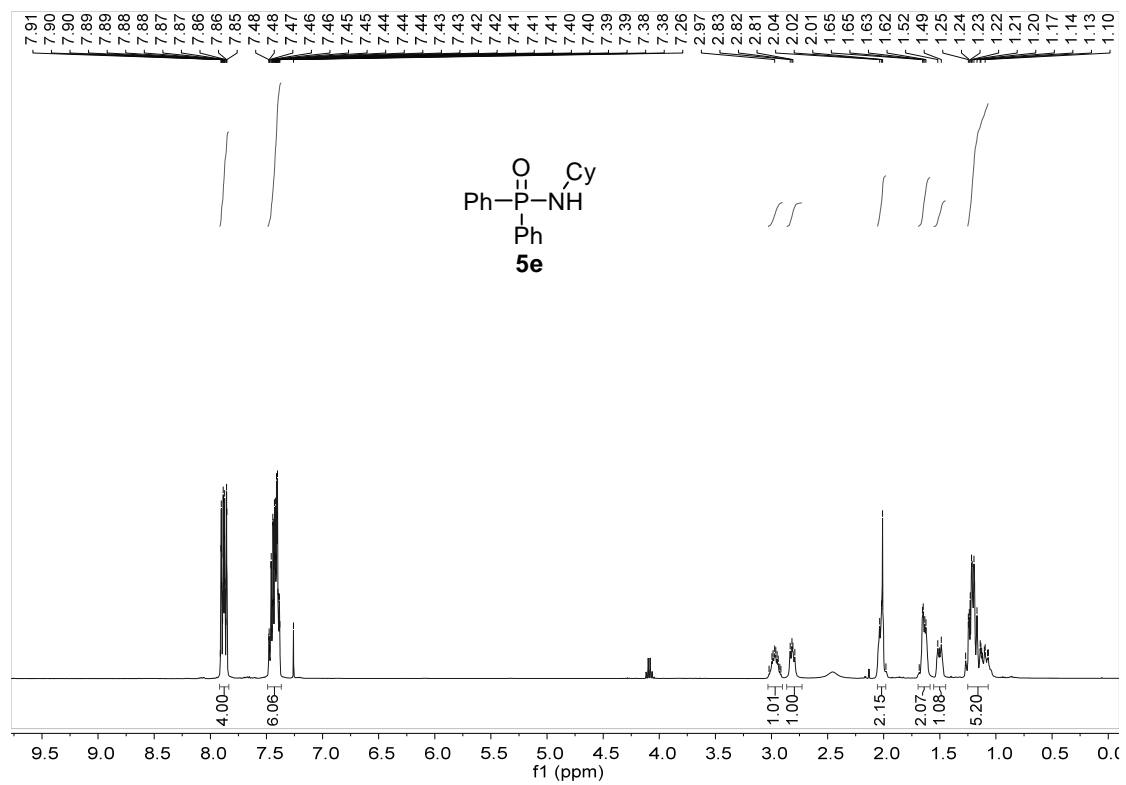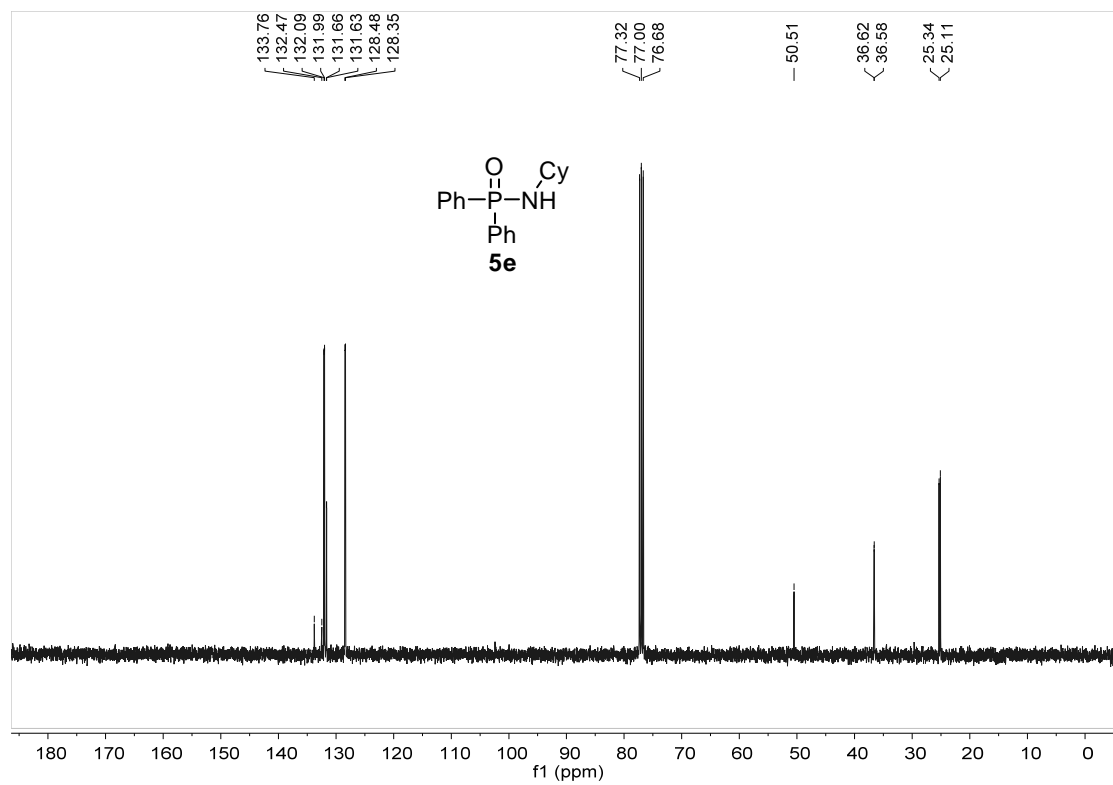

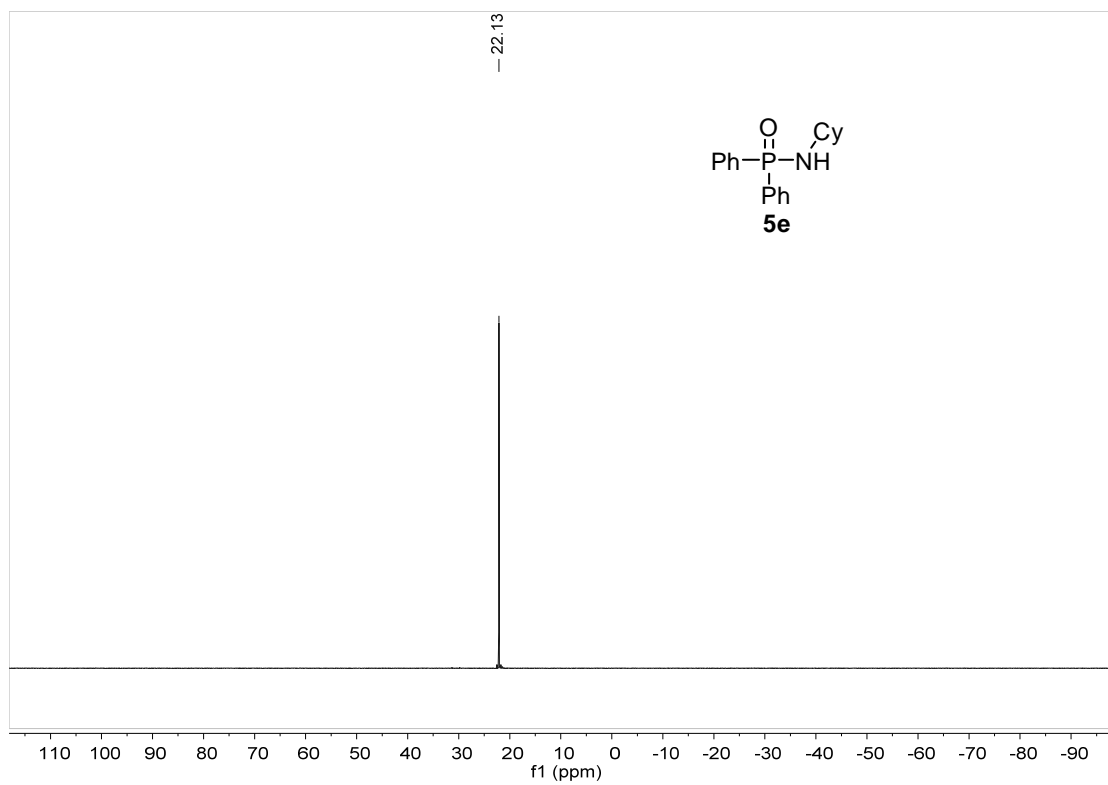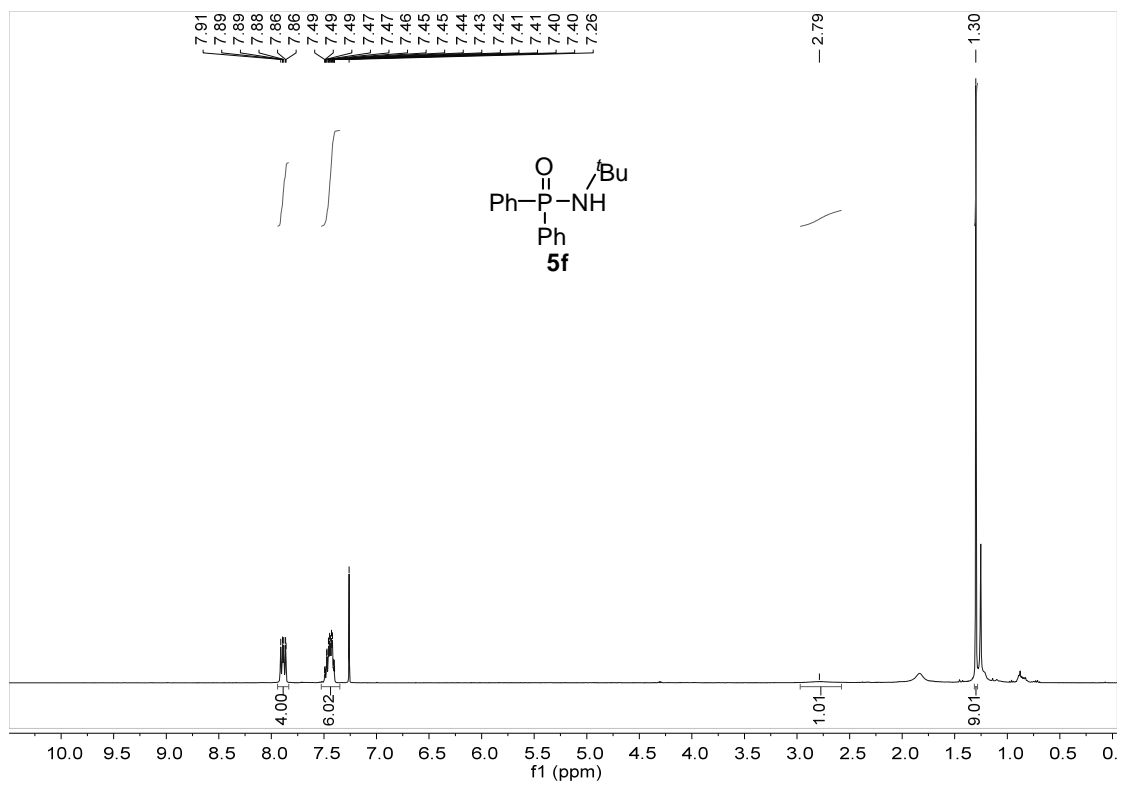

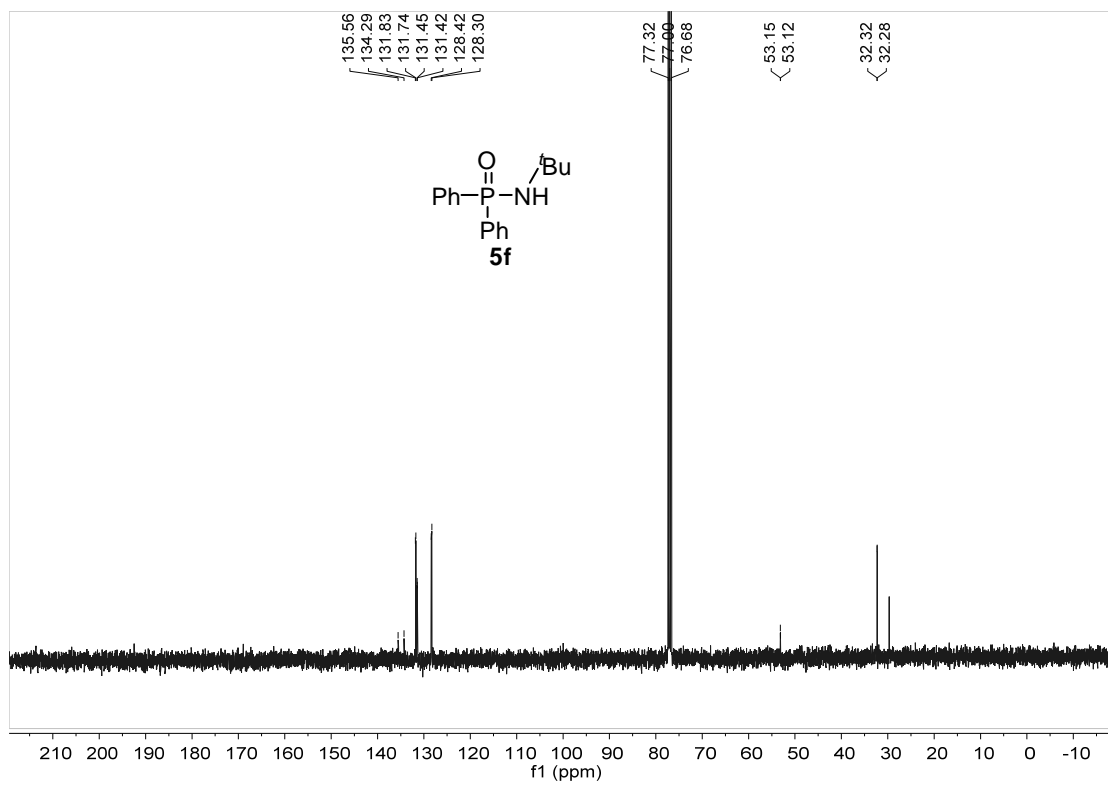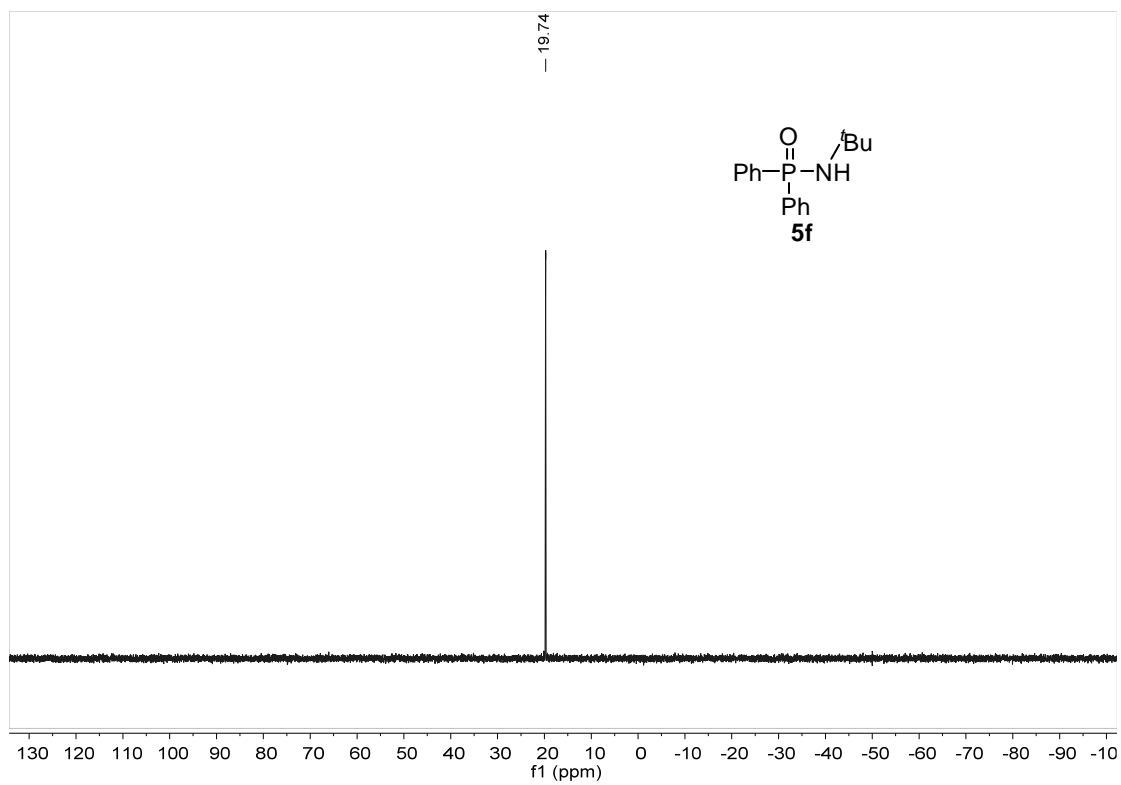

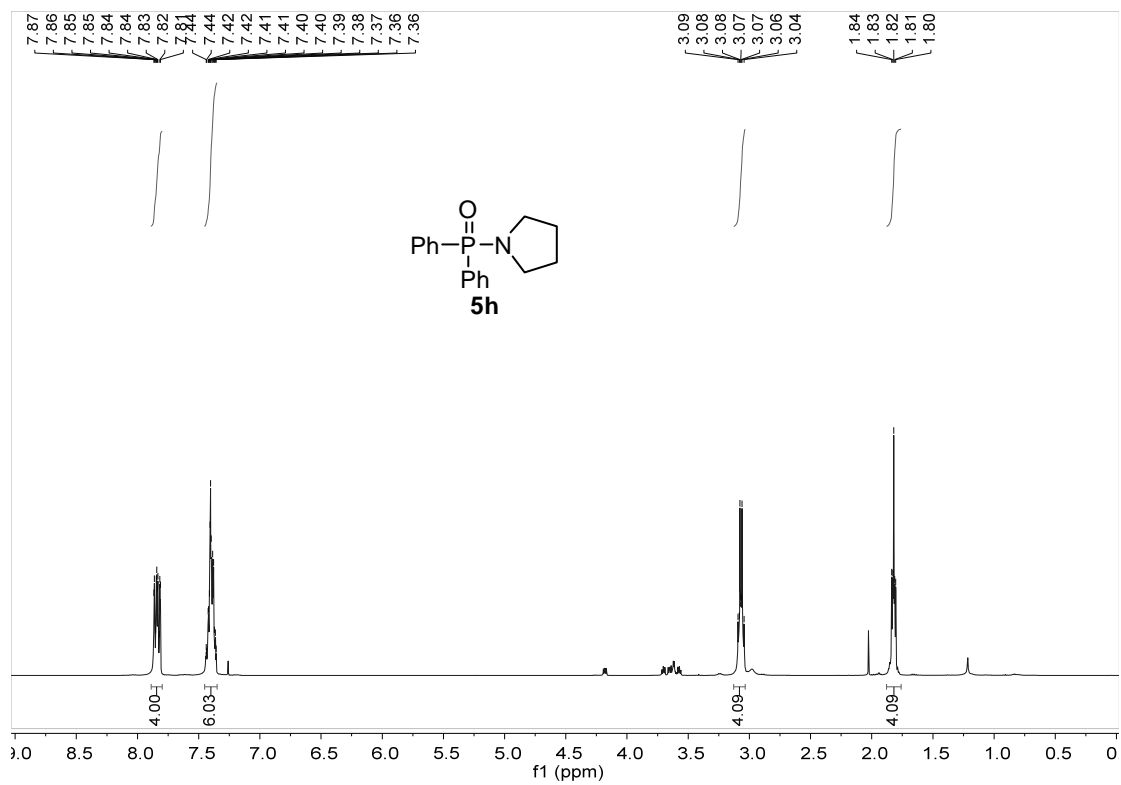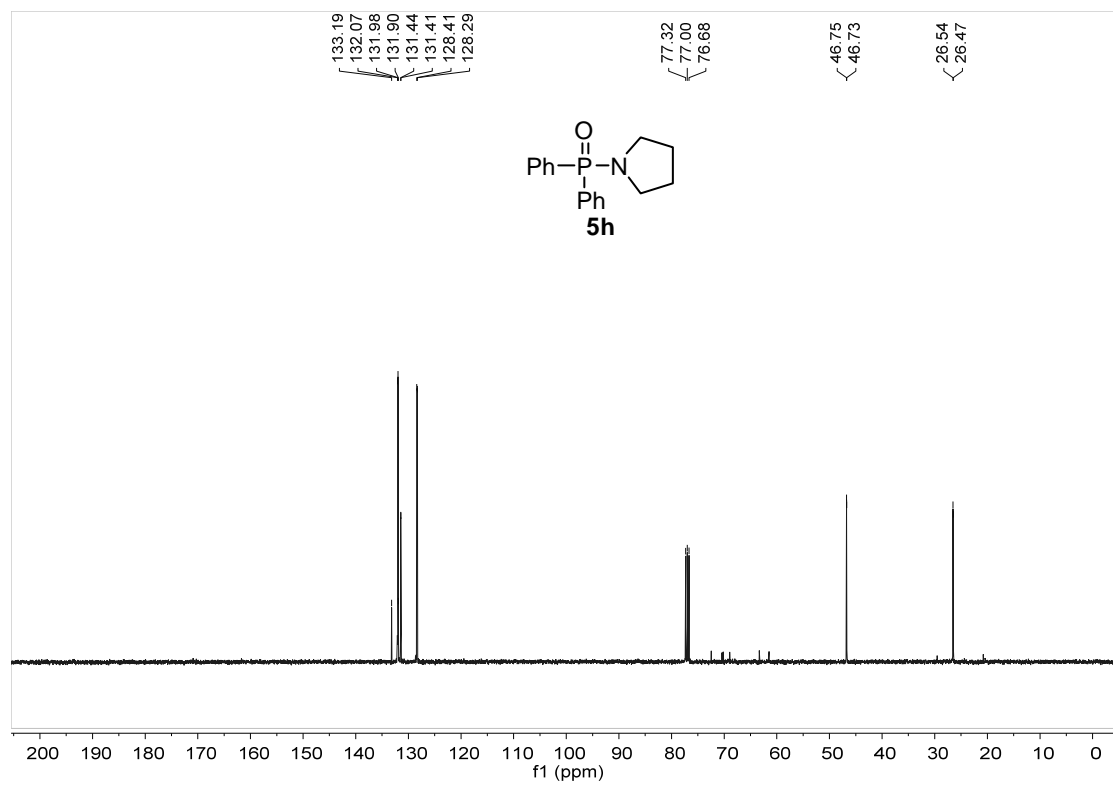

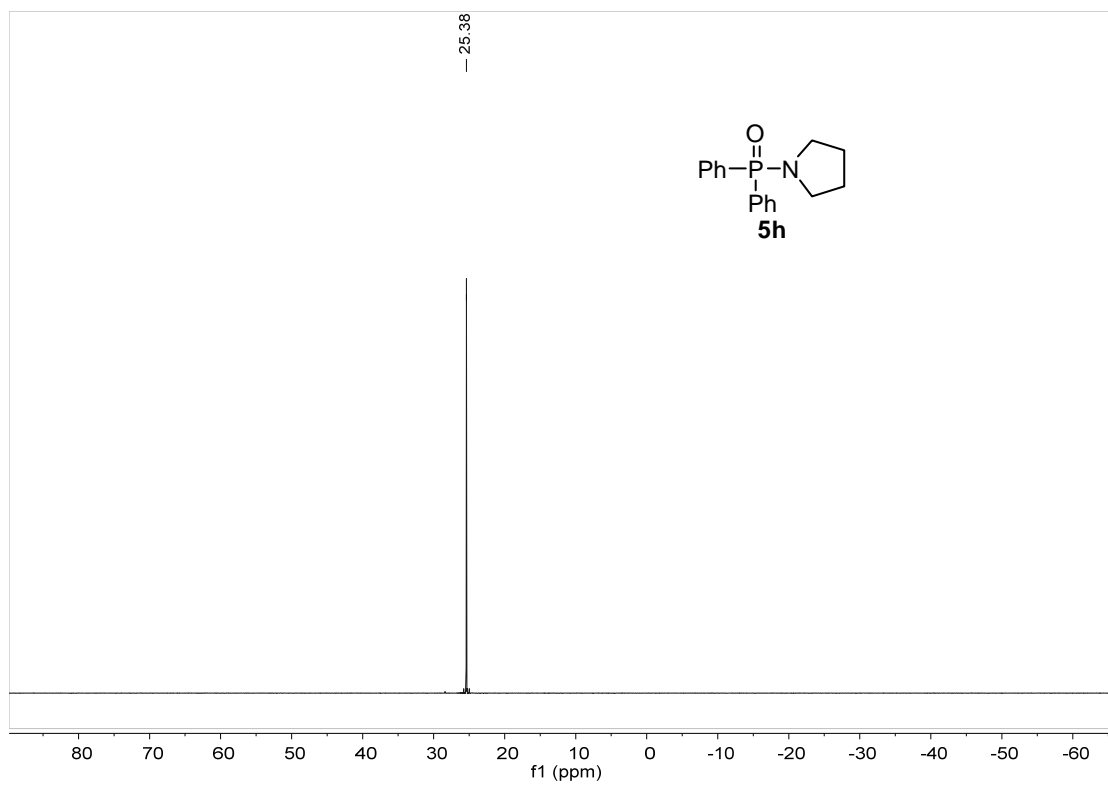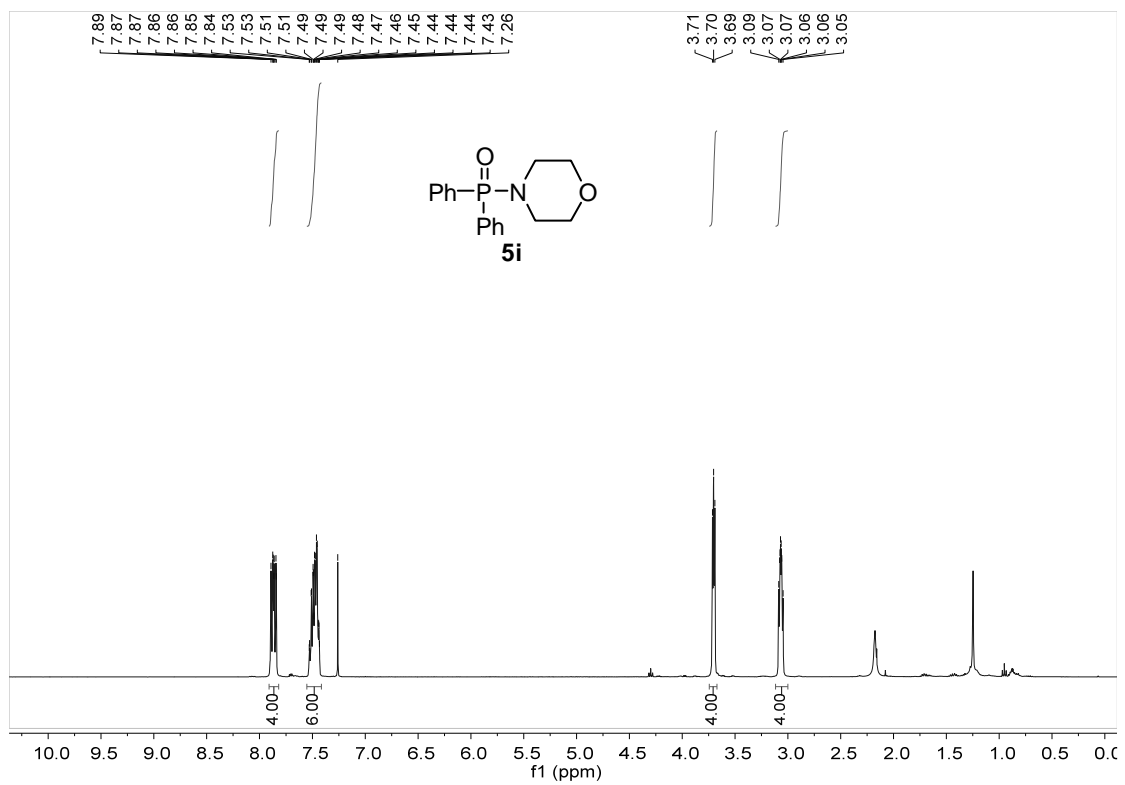

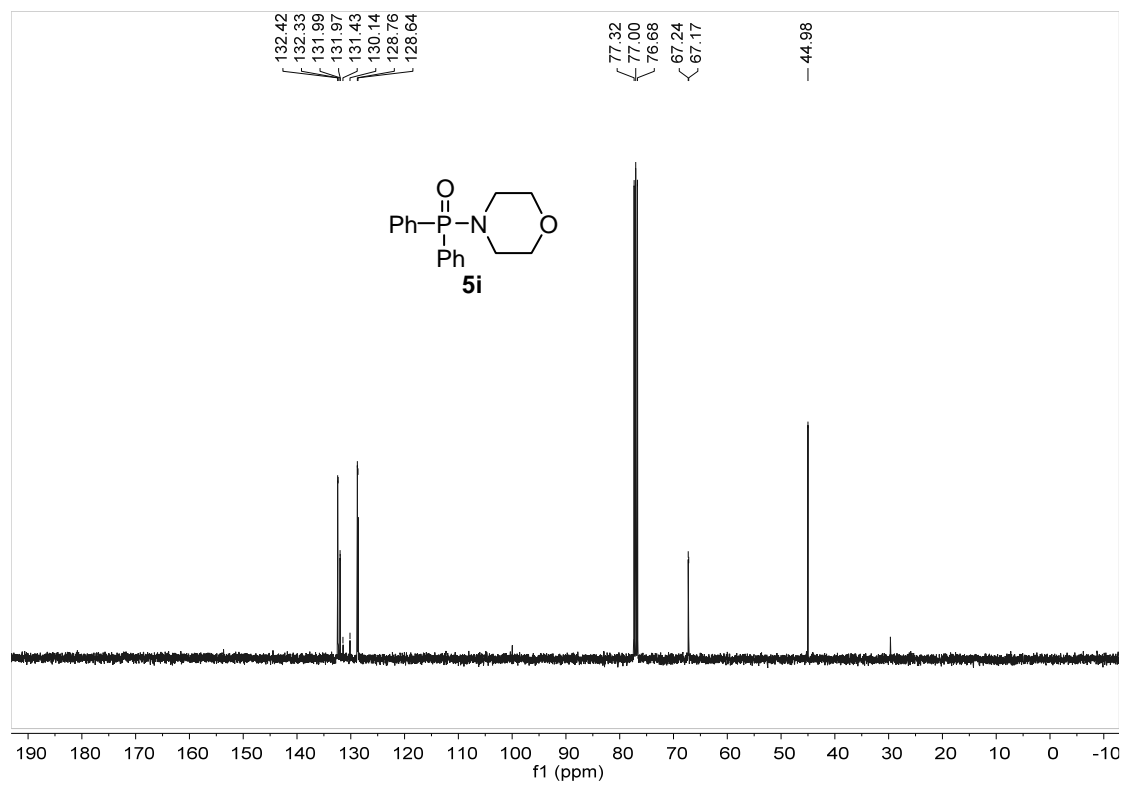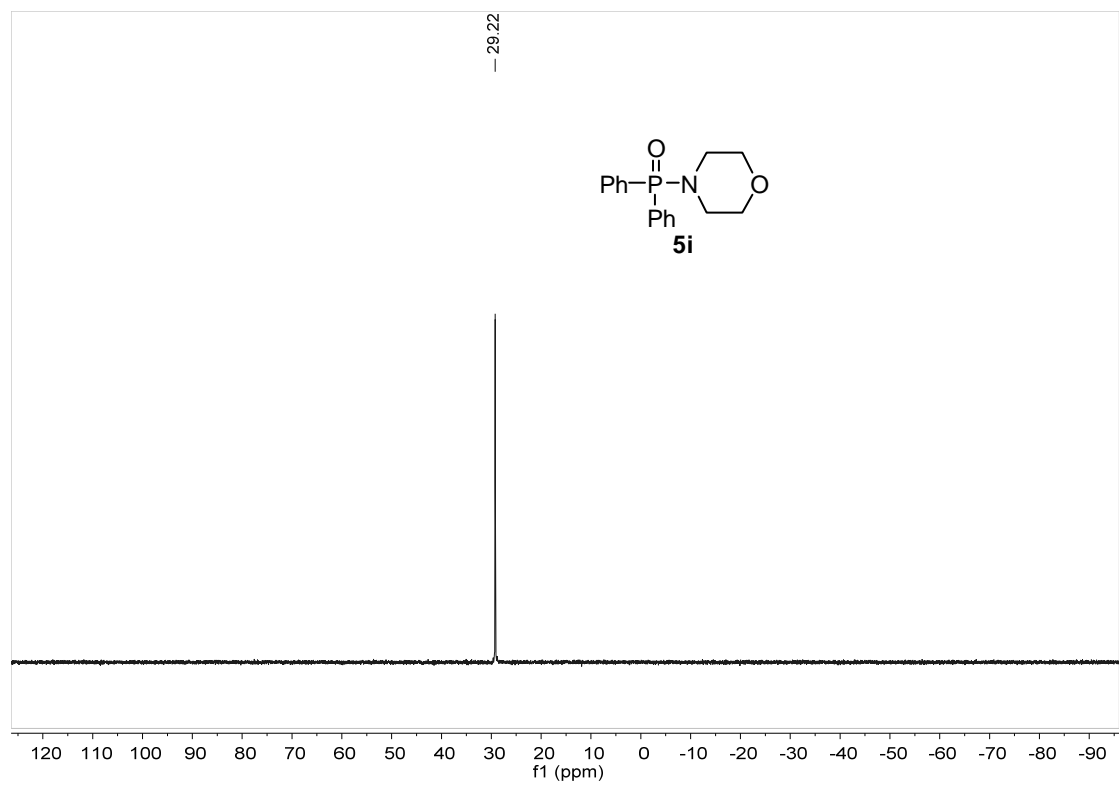

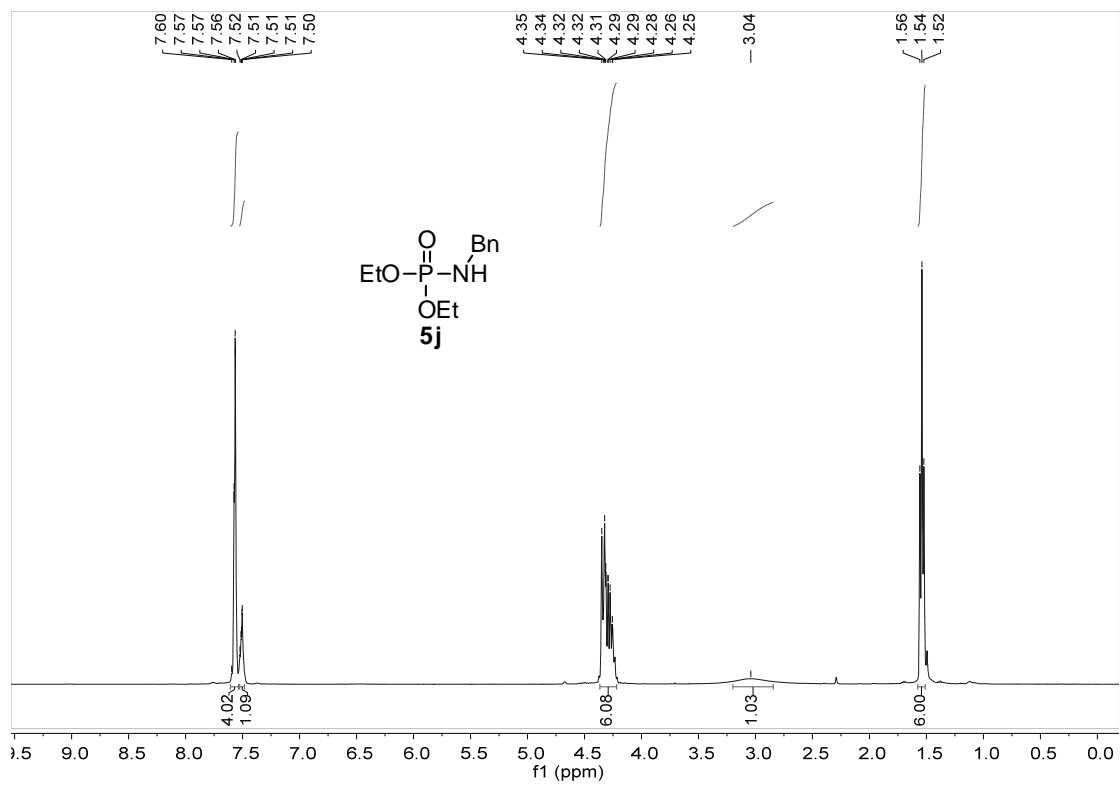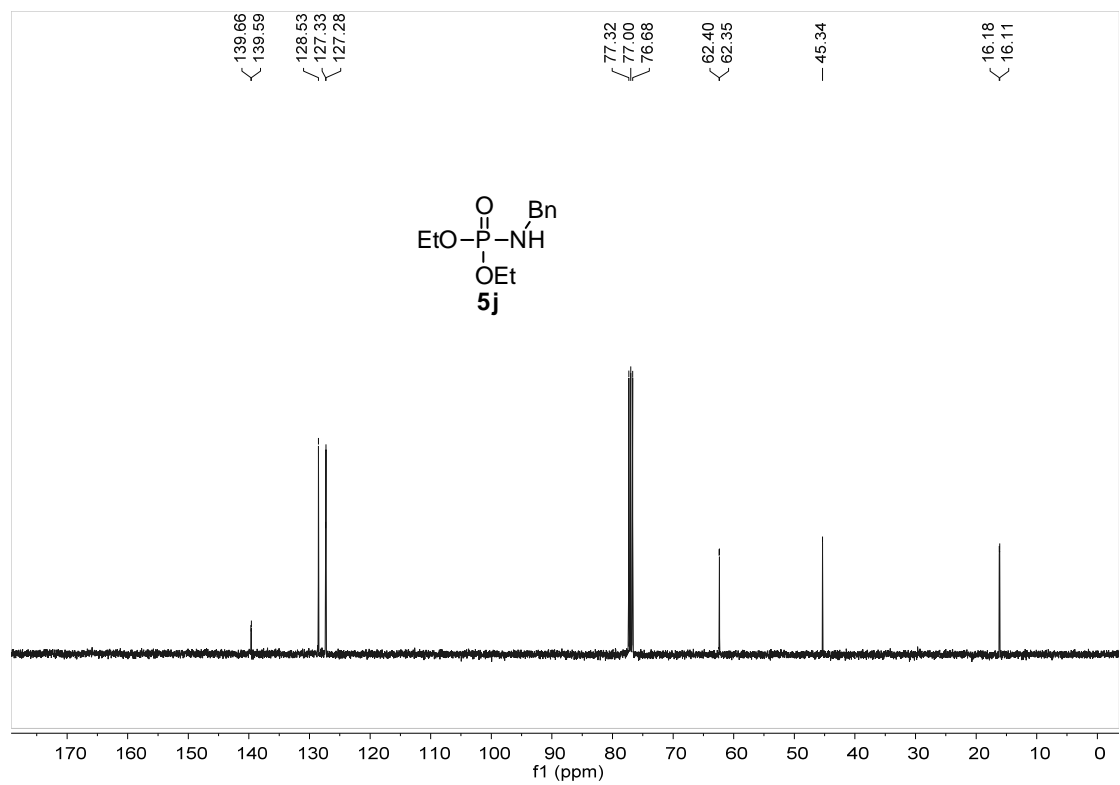

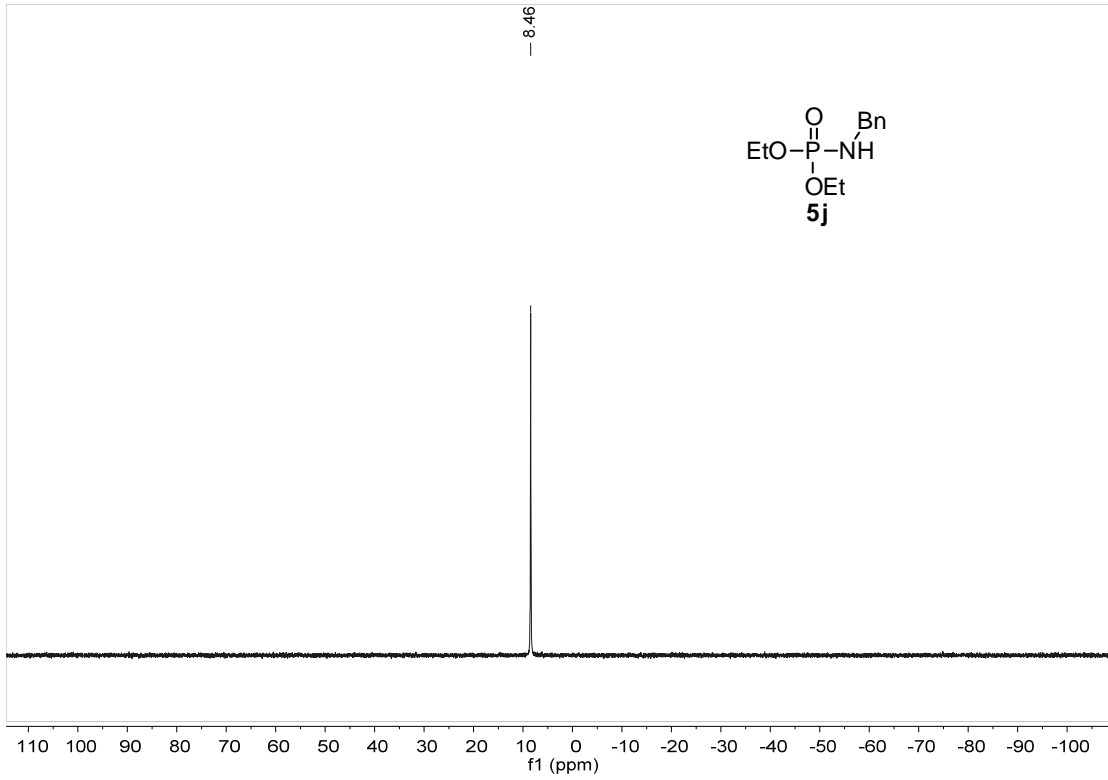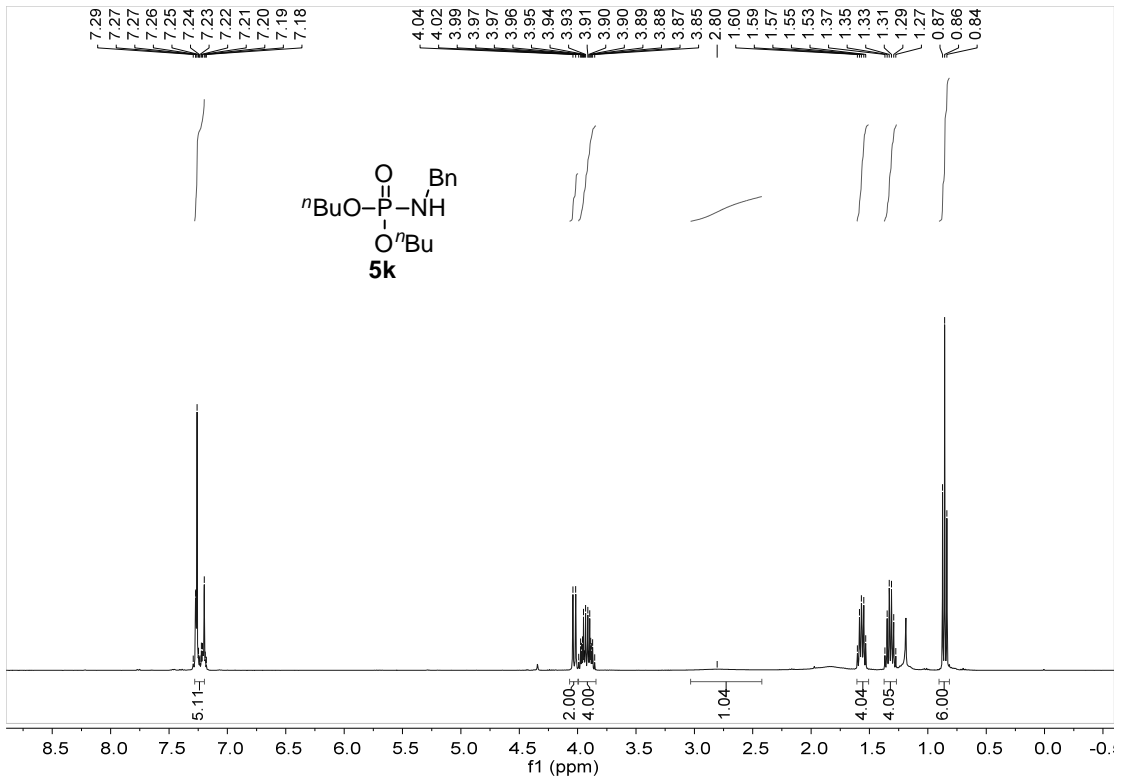



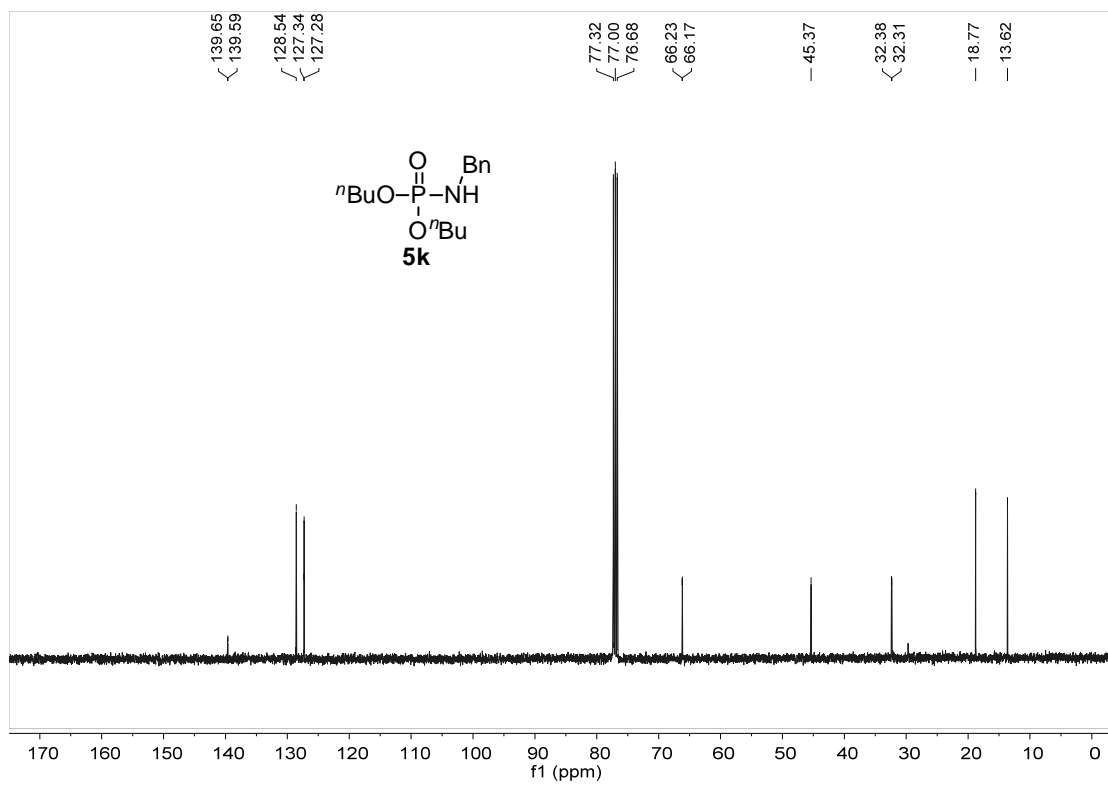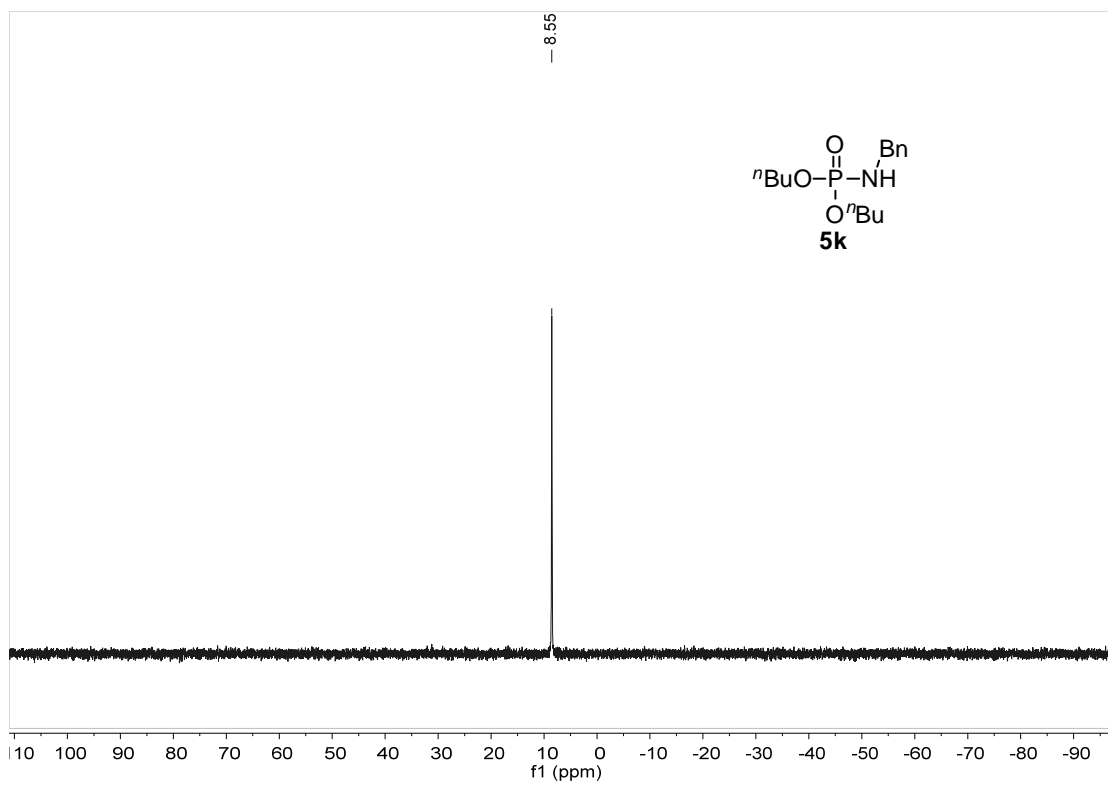

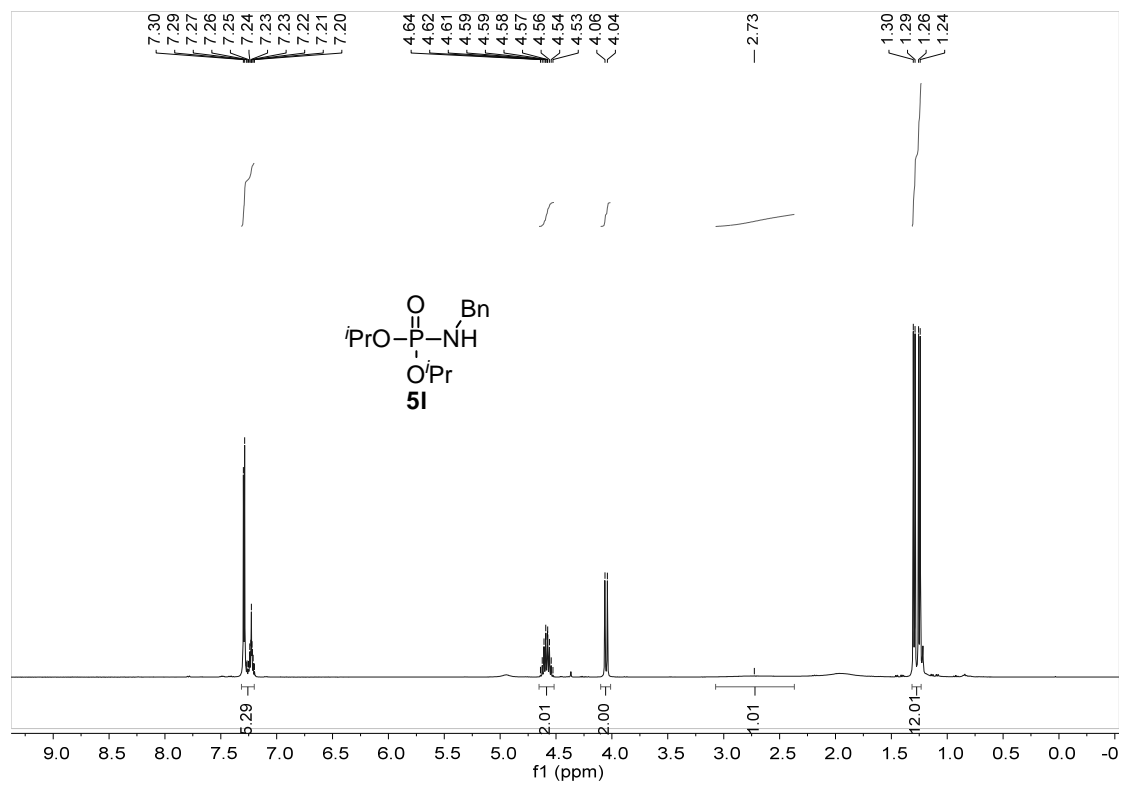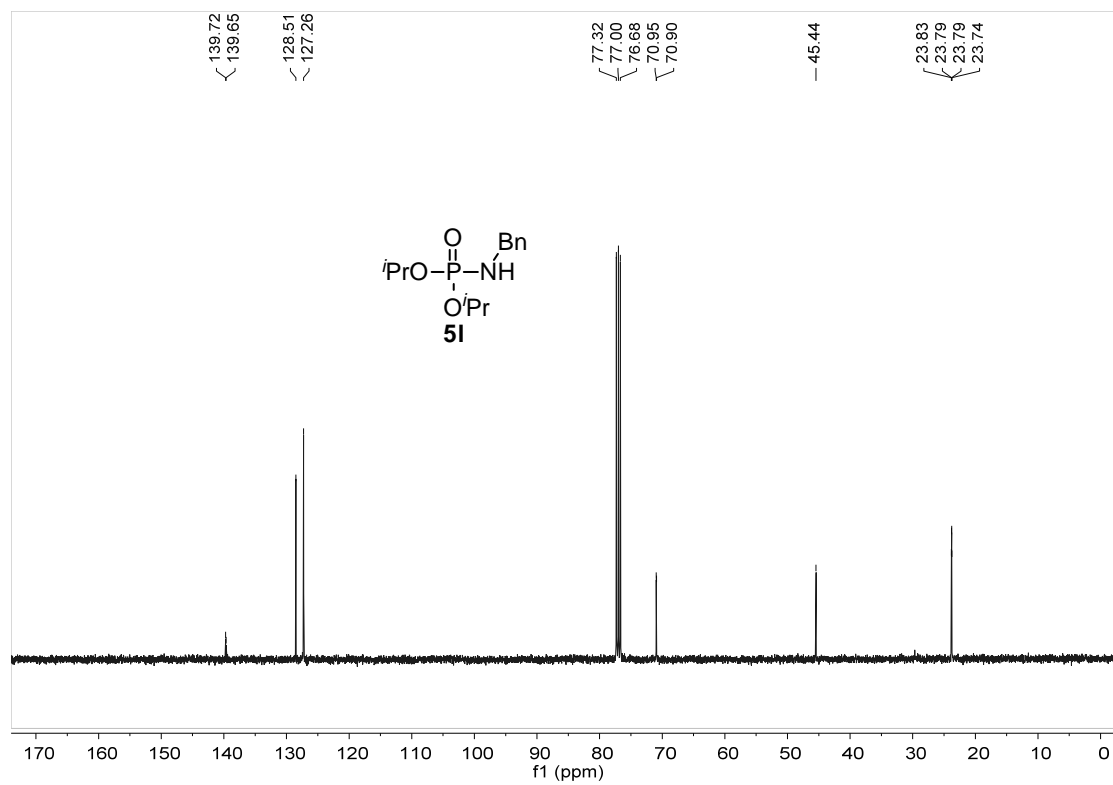

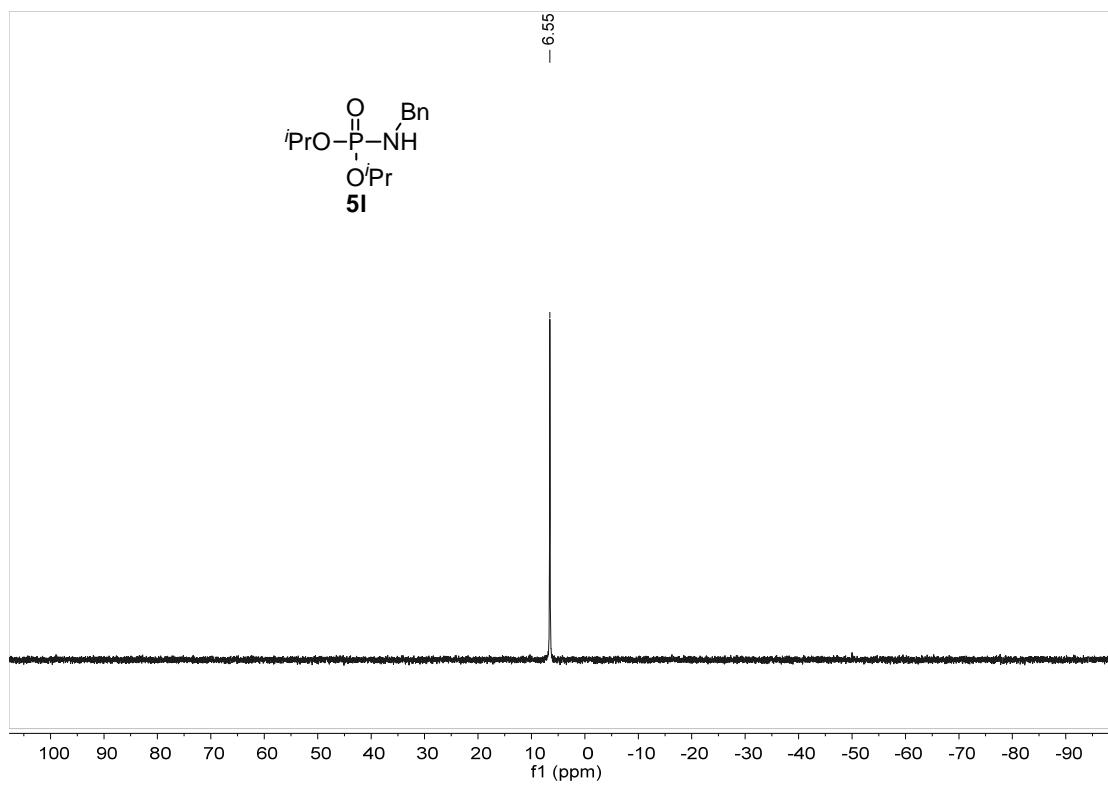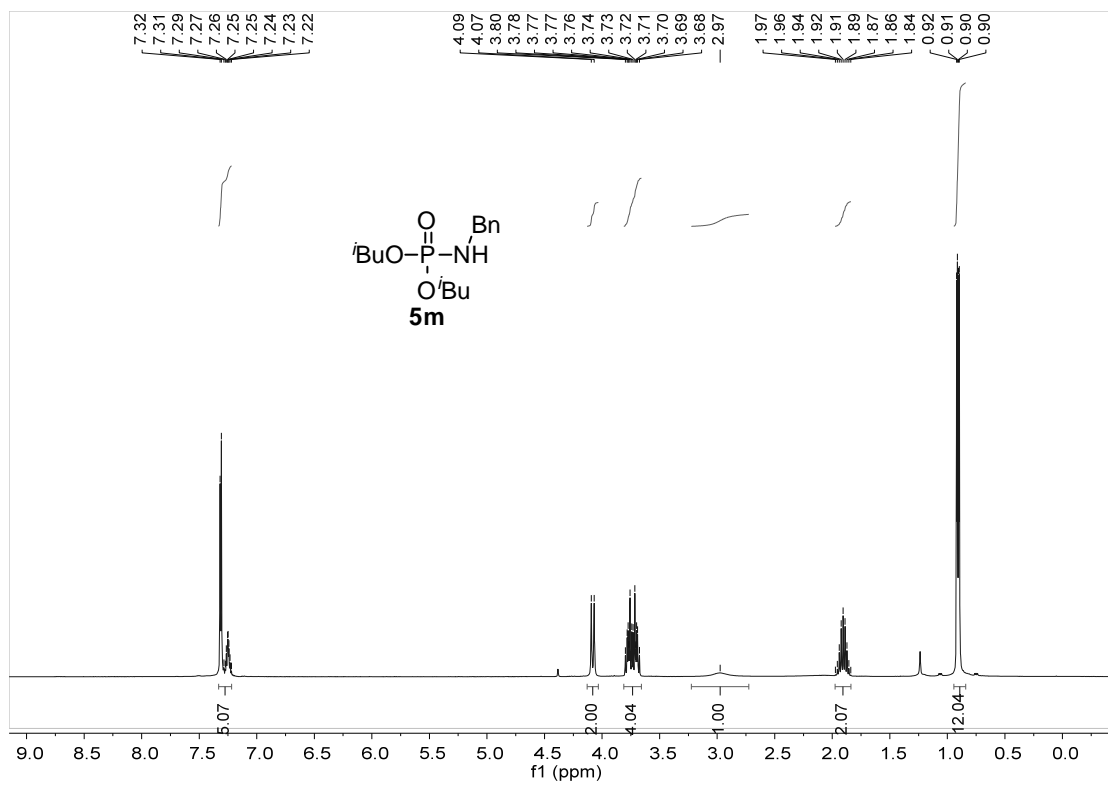

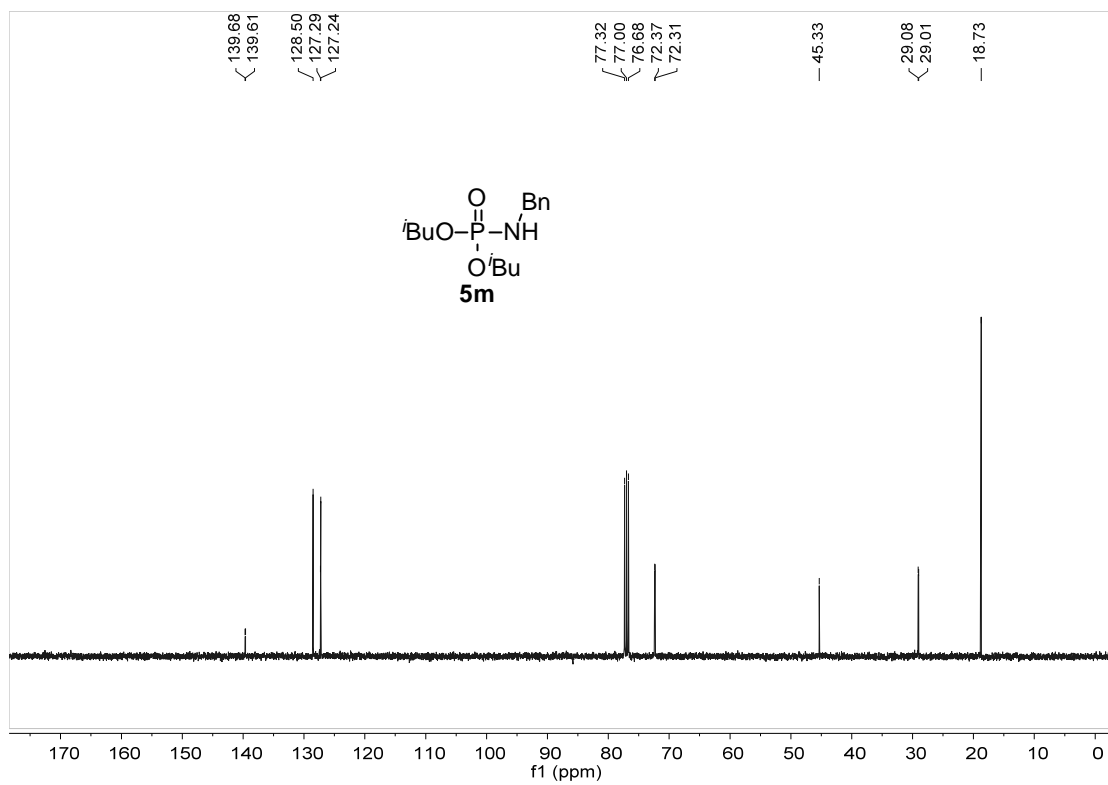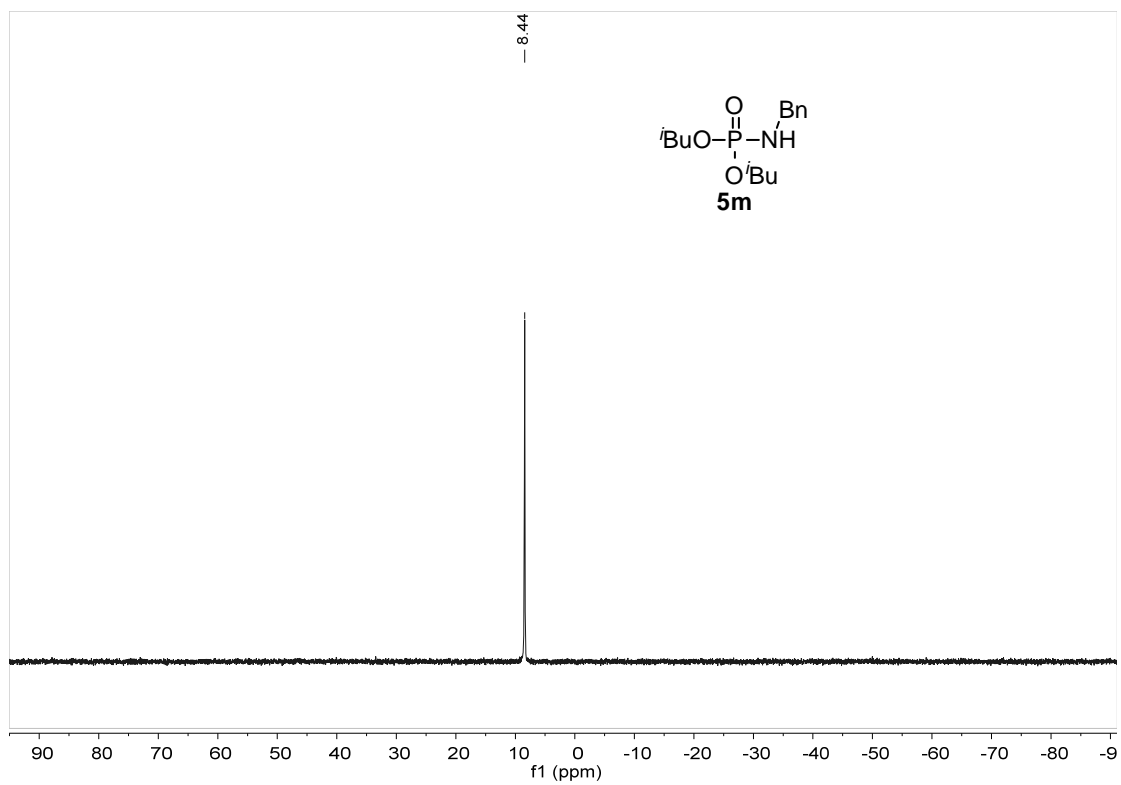

Supplement: c9cc09407e1.pdf [file c9cc09407e1.pdf]
